# Supplementary material
Source: publisher site journal article supplement (https://www.spandidos-publications.com/4260/downloadSupplementary)
Supplement: Supplementary file 1 [file downloadSupplementary]

## Sheet: Table SII
TABLE SII. The ranking results for each of the six cell lines similar to ESCC cells.
pert_id	pert_iname	pert_idose	pert_itime	ZhangScore	pValue	pAdjValue	Cell line
CPC006_A375_24H:BRD-K54233340-300-01-0:10	dorsomorphin	10 μM	24 h	-0.314779	0	0	A375
BRAF001_A375_24H:BRD-K09951645-001-02-7:2.5	dabrafenib	3 μM	24 h	-0.310194	0	0	A375
BRAF001_A375_24H:BRD-U73308409-000-01-9:2.5	vemurafenib	3 μM	24 h	-0.310076	0	0	A375
CPC006_A375_24H:BRD-K41895714-001-02-2:10	AS-605240	10 μM	24 h	-0.304502	0	0	A375
BRAF001_A375_24H:BRD-K16478699-001-05-0:2.5	PLX-4720	3 μM	24 h	-0.29233	0	0	A375
CPC010_A375_6H:BRD-A24643465-001-05-3:10	homoharringtonine	10 μM	6 h	-0.290019	0	0	A375
BRAF001_A375_24H:BRD-K67578145-001-05-5:10	GDC-0879	10 μM	24 h	-0.28912	0	0	A375
CPC006_A375_24H:BRD-K57080016-001-04-3:80	selumetinib	80 μM	24 h	-0.286676	0	0	A375
PRISM001_A375_24H:BRD-K59369769-001-05-4:10	tozasertib	10 μM	24 h	-0.283287	0	0	A375
CPC006_A375_24H:BRD-K12502280-001-01-5:11.1	TG-101348	10 μM	24 h	-0.27385	0	0	A375
CPC006_A375_24H:BRD-K34581968-001-01-2:11.1	BMS-536924	10 μM	24 h	-0.273315	0	0	A375
DOSBIO001_A375_24H:BRD-A19037878:0.37037	trichostatin-a	500 nM	24 h	-0.264036	0	0	A375
CPC006_A375_24H:BRD-U88459701-000-01-8:10	atorvastatin	10 μM	24 h	-0.26116	0	0	A375
CPC006_A375_24H:BRD-K03618428-001-01-3:22.2	PP-110	20 μM	24 h	-0.25951	0	0	A375
CPC007_A375_6H:BRD-K25150581-001-05-5:10	BRD-K25150581	10 μM	6 h	-0.25871	0	0	A375
CPC007_A375_24H:BRD-K81418486-001-21-0:10	vorinostat	10 μM	24 h	-0.256817	0	0	A375
CPC011_A375_6H:BRD-A48261811-001-03-2:10	argatroban	10 μM	6 h	-0.255619	0	0	A375
PRISM001_A375_24H:BRD-K36740062-001-02-5:2.5	GSK-1070916	3 μM	24 h	-0.254267	0	0	A375
CPC006_A375_24H:BRD-K69840642-001-01-4:10	ISOX	10 μM	24 h	-0.252369	0	0	A375
DOS033_A375_24H:BRD-K47394228-001-01-1:5.02	BRD-K47394228	5 μM	24 h	-0.250305	0	0	A375
CPC005_A375_24H:BRD-A81772229-001-01-6:10	simvastatin	10 μM	24 h	-0.247288	0	0	A375
CPC016_A375_6H:BRD-A30437061-001-02-7:10	camptothecin	10 μM	6 h	-0.246102	0	0	A375
DOS049_A375_24H:BRD-K84421421-001-01-1:5	BRD-K84421421	5 μM	24 h	-0.24302	0	0	A375
CPC008_A375_24H:BRD-K29506255-019-01-0:10	BRD-K29506255	10 μM	24 h	-0.242308	0	0	A375
CPC013_A375_6H:BRD-K64606589-001-01-9:10	apicidin	10 μM	6 h	-0.242265	0	0	A375
CPC011_A375_6H:BRD-K37270826-001-20-1:10	mifepristone	10 μM	6 h	-0.241659	0	0	A375
DOSBIO001_A375_24H:BRD-K58292285:9.838	SA-1921085	10 μM	24 h	-0.241456	0	0	A375
CPC020_A375_6H:BRD-K52522949-001-01-7:10	NCH-51	10 μM	6 h	-0.240768	0	0	A375
CPC004_A375_6H:BRD-K99621550-003-03-4:10	tubocurarine	10 μM	6 h	-0.240432	0	0	A375
PCLB001_A375_24H:BRD-A59431241-001-02-9:2.5	COL-3	3 μM	24 h	-0.240081	0	0	A375
CPC013_A375_6H:BRD-K72703948-001-03-6:10	ZM-447439	10 μM	6 h	-0.239562	0	0	A375
CPC006_A375_24H:BRD-K10705233-003-02-8:40	GW-405833	40 μM	24 h	-0.238607	0	0	A375
CPC006_A375_24H:BRD-K53414658-001-01-7:10	tivozanib	10 μM	24 h	-0.237733	0	0	A375
CPC006_A375_24H:BRD-K41859756-001-01-9:10	NVP-AUY922	10 μM	24 h	-0.237176	0	0	A375
CPC016_A375_6H:BRD-K62996583-001-03-8:10	lidoflazine	10 μM	6 h	-0.235401	0	0	A375
DOSBIO002_A375_24H:BRD-A75409952:10	wortmannin	10 μM	24 h	-0.235322	0	0	A375
CPC007_A375_6H:BRD-K25373946-001-04-6:10	BRD-K25373946	10 μM	6 h	-0.235321	0	0	A375
CPC011_A375_6H:BRD-A30977374-001-13-1:10	nifedipine	10 μM	6 h	-0.234451	0	0	A375
CPC005_A375_24H:BRD-K39520573-001-01-2:10	GW-5074	10 μM	24 h	-0.234057	0	0	A375
DOSBIO001_A375_24H:BRD-A19500257:10	geldanamycin	10 μM	24 h	-0.233247	0	0	A375
CPC006_A375_6H:BRD-A91699651-316-06-7:10	chloroquine	10 μM	6 h	-0.231775	0	0	A375
CPC009_A375_6H:BRD-K31887147-019-01-2:10	BRD-K31887147	10 μM	6 h	-0.230709	0	0	A375
CPC006_A375_6H:BRD-A38030642-001-02-0:10	cyclosporin-a	10 μM	6 h	-0.230592	0	0	A375
CPC011_A375_6H:BRD-K18523449-001-02-1:10	mestanolone	10 μM	6 h	-0.228314	0	0	A375
CPC007_A375_6H:BRD-K90207583-001-05-1:10	PSH-008	10 μM	6 h	-0.228014	0	0	A375
CPC006_A375_24H:BRD-K69328504-001-01-7:10	L-690488	10 μM	24 h	-0.227603	0	0	A375
CPC011_A375_6H:BRD-K49481516-004-14-2:10	galantamine	10 μM	6 h	-0.227596	0	0	A375
CPC014_A375_6H:BRD-K64800655-001-01-7:10	PHA-793887	10 μM	6 h	-0.227417	0	0	A375
CPC011_A375_6H:BRD-K37694030-003-07-7:10	doxepin	10 μM	6 h	-0.227156	0	0	A375
CPC007_A375_6H:BRD-K58679021-001-07-7:10	BRD-K58679021	10 μM	6 h	-0.226144	0	0	A375
CPC006_A375_6H:BRD-A62809825-001-01-7:10	thapsigargin	10 μM	6 h	-0.225866	0	0	A375
CPC009_A375_6H:BRD-K03829970-019-01-0:10	BRD-K03829970	10 μM	6 h	-0.225537	0	0	A375
CPC011_A375_6H:BRD-K60160658-003-07-0:10	tiagabine	10 μM	6 h	-0.225465	0	0	A375
CPC004_A375_6H:BRD-A07440155-003-16-3:10	labetalol	10 μM	6 h	-0.224898	0	0	A375
CPC011_A375_6H:BRD-A00520476-001-05-8:10	AF-DX-116	10 μM	6 h	-0.22439	0	0	A375
CPC006_A375_6H:BRD-K66874953-004-02-1:69.83	pifithrin-alpha	70 μM	6 h	-0.224346	0	0	A375
CPC005_A375_6H:BRD-K86509404-001-03-8:10	iso-olomoucine	10 μM	6 h	-0.223903	0	0	A375
CPC009_A375_6H:BRD-K65242613-001-04-6:10	BRD-K65242613	10 μM	6 h	-0.223846	0	0	A375
CPC016_A375_6H:BRD-K27450477-001-03-9:10	EHNA	10 μM	6 h	-0.223293	0	0	A375
CPC014_A375_6H:BRD-U00779237-000-01-7:10	WZ-3105	10 μM	6 h	-0.222983	0	0	A375
CPC011_A375_6H:BRD-K31534764-050-01-7:10	fluvoxamine	10 μM	6 h	-0.222808	0	0	A375
CPC011_A375_6H:BRD-K49111258-311-05-4:10	prazosin	10 μM	6 h	-0.222694	0	0	A375
CPC011_A375_6H:BRD-K02227374-003-04-8:10	milnacipran	10 μM	6 h	-0.221376	0	0	A375
CPC006_A375_24H:BRD-K09499853-305-01-1:10	KU-0060648	10 μM	24 h	-0.22069	0	0	A375
CPC014_A375_6H:BRD-K99964838-001-03-6:10	bosutinib	10 μM	6 h	-0.220352	0	0	A375
CPC011_A375_6H:BRD-K30480208-001-14-4:10	torasemide	10 μM	6 h	-0.219622	0	0	A375
CPC010_A375_6H:BRD-K18816859-002-04-6:10	L-694247	10 μM	6 h	-0.219527	0	0	A375
CPC006_A375_6H:BRD-A79768653-001-02-1:10	sirolimus	10 μM	6 h	-0.219238	0	0	A375
CPC011_A375_6H:BRD-K68132782-003-10-4:10	terbinafine	10 μM	6 h	-0.218789	0	0	A375
CPC005_A375_6H:BRD-K80451230-051-01-8:10	zamifenacin	10 μM	6 h	-0.218661	0	0	A375
CPC006_A375_24H:BRD-K74236984-001-01-4:10	UNC-0321	10 μM	24 h	-0.218446	0	0	A375
CPC005_A375_6H:BRD-A47065382-001-02-9:10	huperzine-a	10 μM	6 h	-0.218436	0	0	A375
CPC006_A375_24H:BRD-K61829047-001-01-6:10	7b-cis	10 μM	24 h	-0.218051	0	0	A375
CPC006_A375_6H:BRD-K16406336-311-01-2:10	methylene-blue	10 μM	6 h	-0.217831	0	0	A375
CPC005_A375_6H:BRD-A43974575-065-04-4:10	tranylcypromine	10 μM	6 h	-0.217699	0	0	A375
CPC016_A375_6H:BRD-K79684402-300-01-0:10	Ro-10-5824	10 μM	6 h	-0.217481	0	0	A375
DOS057_A375_24H:BRD-K22571527-001-01-1:5	BRD-K22571527	5 μM	24 h	-0.216958	0	0	A375
CPC005_A375_24H:BRD-K50464341-001-02-6:10	berbamine	10 μM	24 h	-0.216703	0	0	A375
CPC011_A375_6H:BRD-K09963420-066-10-9:10	saquinavir	10 μM	6 h	-0.216578	0	0	A375
CPC012_A375_6H:BRD-K02130563-001-06-4:10	panobinostat	10 μM	6 h	-0.216252	0	0	A375
CPC006_A375_24H:BRD-K66792149-001-01-8:11.1	quinoclamine	10 μM	24 h	-0.215756	0	0	A375
CPC011_A375_6H:BRD-K45033733-001-08-0:10	famciclovir	10 μM	6 h	-0.214974	0	0	A375
CPC009_A375_6H:BRD-A82197375-001-04-1:10	BRD-A82197375	10 μM	6 h	-0.21493	0	0	A375
CPC011_A375_6H:BRD-A68888262-003-12-8:10	azelastine	10 μM	6 h	-0.214155	0	0	A375
CPC011_A375_6H:BRD-K73991644-001-05-8:10	isoquercetin	10 μM	6 h	-0.214096	0	0	A375
DOS044_A375_24H:BRD-K87554792-001-01-7:5	BRD-K87554792	5 μM	24 h	-0.214014	0	0	A375
PRISM001_A375_24H:BRD-K36134449-001-01-7:5	BRD-K36134449	5 μM	24 h	-0.213942	0	0	A375
CPC011_A375_6H:BRD-K99447003-001-04-9:10	enalaprilat	10 μM	6 h	-0.212809	0	0	A375
CPC006_A375_6H:BRD-K39503511-001-02-1:80	quiflapon	80 μM	6 h	-0.211776	0	0	A375
CPC011_A375_6H:BRD-K44442813-001-07-9:10	pidotimod	10 μM	6 h	-0.211697	0	0	A375
CPC006_A375_6H:BRD-K18849474-001-01-0:79.44	dalcetrapib	80 μM	6 h	-0.211175	0	0	A375
CPC005_A375_6H:BRD-K51476772-001-01-9:10	ST-638	10 μM	6 h	-0.210523	0	0	A375
CPC007_A375_6H:BRD-K72307842-001-02-5:10	BRD-K72307842	10 μM	6 h	-0.210306	0	0	A375
CPC007_A375_24H:BRD-K25662647-001-05-1:10	FU-JMBII105B	10 μM	24 h	-0.210262	0	0	A375
CPC011_A375_6H:BRD-K02992638-001-07-6:10	lamivudine	10 μM	6 h	-0.209871	0	0	A375
PCLB003_A375_24H:BRD-K78431006-001-05-2:1.11	crizotinib	1.11 μM	24 h	-0.209542	0	0	A375
CPC006_A375_6H:BRD-K53855319-001-01-2:11.1	SRT-1720	10 μM	6 h	-0.209425	0	0	A375
CPC009_A375_6H:BRD-K97534490-001-06-1:10	BRD-K97534490	10 μM	6 h	-0.209361	0	0	A375
CPC014_A375_6H:BRD-K79404599-001-03-6:10	enzastaurin	10 μM	6 h	-0.209361	0	0	A375
CPC019_A375_6H:BRD-A94377914-001-02-7:10	merck-ketone	10 μM	6 h	-0.209298	0	0	A375
CPC009_A375_6H:BRD-K82312777-001-03-0:10	KU-C104132	10 μM	6 h	-0.209069	0	0	A375
CPC007_A375_6H:BRD-K19290969-001-07-5:10	BRD-K19290969	10 μM	6 h	-0.207941	0	0	A375
DOS049_A375_24H:BRD-K88647644-001-01-8:5	BRD-K88647644	5 μM	24 h	-0.20748	0	0	A375
CPC006_A375_24H:BRD-K51575138-001-01-7:10	TPCA-1	10 μM	24 h	-0.207368	0	0	A375
CPC012_A375_6H:BRD-K00486725-001-01-8:10	BRD-K00486725	10 μM	6 h	-0.207222	0	0	A375
CPC006_A375_6H:BRD-K68065987-300-03-4:10	MK-2206	10 μM	6 h	-0.207051	0	0	A375
CPC011_A375_6H:BRD-K33106058-001-12-7:10	cytarabine	10 μM	6 h	-0.206531	0	0	A375
CPC006_A375_24H:BRD-K20285085-001-01-4:10	fostamatinib	10 μM	24 h	-0.206471	0	0	A375
CPC006_A375_24H:BRD-A45889380-300-04-8:10	mepacrine	10 μM	24 h	-0.206307	0	0	A375
CPC017_A375_6H:BRD-K04546108-066-01-5:10	JAK3-inhibitor-VI	10 μM	6 h	-0.205921	0	0	A375
DOS047_A375_24H:BRD-K43570134-001-01-3:4.94	BRD-K43570134	5 μM	24 h	-0.205698	0	0	A375
DOSBIO002_A375_24H:BRD-K08251038:10.1126	BRD-K08251038	10 μM	24 h	-0.205604	0	0	A375
DOS046_A375_24H:BRD-K91868345-001-01-7:5	BRD-K91868345	5 μM	24 h	-0.205532	0	0	A375
CPC011_A375_6H:BRD-K88679075-001-04-3:10	methandriol	10 μM	6 h	-0.205256	0	0	A375
CPC010_A375_6H:BRD-K54314721-001-06-0:10	zolmitriptan	10 μM	6 h	-0.204927	0	0	A375
CPC016_A375_6H:BRD-K22010301-001-01-2:10	JLK-6	10 μM	6 h	-0.204499	0	0	A375
CPC006_A375_6H:BRD-K86574132-001-04-9:48	BRD-K86574132	50 μM	6 h	-0.204497	0	0	A375
CPC011_A375_6H:BRD-K75699339-057-05-7:10	rizatriptan	10 μM	6 h	-0.204342	0	0	A375
CPC010_A375_6H:BRD-K70977695-001-04-1:10	BRD-K70977695	10 μM	6 h	-0.204322	0	0	A375
CPC017_A375_6H:BRD-K14441456-001-01-2:10	tyrphostin-AG-556	10 μM	6 h	-0.204222	0	0	A375
CPC009_A375_6H:BRD-K29500995-001-01-6:10	BRD-K29500995	10 μM	6 h	-0.203936	0	0	A375
CPC008_A375_6H:BRD-K01896723-001-01-9:10	BRD-K01896723	10 μM	6 h	-0.203432	0	0	A375
CPC006_A375_24H:BRD-K68336408-001-04-2:56.78	tyrphostin-AG-1478	60 μM	24 h	-0.203363	0	0	A375
CPC011_A375_6H:BRD-K09471561-001-15-8:10	levofloxacin	10 μM	6 h	-0.203205	0	0	A375
CPC013_A375_6H:BRD-A50796384-001-01-3:10	NK26-I-41-1	10 μM	6 h	-0.203177	0	0	A375
CPC017_A375_6H:BRD-A17453586-003-01-5:10	MDL-72832	10 μM	6 h	-0.203109	0	0	A375
CPC011_A375_6H:BRD-K88304388-045-14-6:10	dextrorphan	10 μM	6 h	-0.20306	0	0	A375
CPC014_A375_6H:BRD-K38615104-001-06-8:10	A-443644	10 μM	6 h	-0.202508	0	0	A375
DOS046_A375_24H:BRD-K52758732-001-01-8:5	BRD-K52758732	5 μM	24 h	-0.202363	0	0	A375
CPC006_A375_6H:BRD-K59962020-001-06-9:10	CHEMBL-374350	10 μM	6 h	-0.202118	0	0	A375
CPC010_A375_6H:BRD-A61856038-001-05-3:10	tremulacin	10 μM	6 h	-0.20211	0	0	A375
CPC016_A375_6H:BRD-K54210043-001-02-0:10	NS-1619	10 μM	6 h	-0.202089	0	0	A375
PCLB003_A375_24H:BRD-K24576554-001-01-4:0.37	AT-9283	0.37 μM	24 h	-0.201852	0	0	A375
CPC008_A375_24H:BRD-K30836161-019-01-1:10	BRD-K30836161	10 μM	24 h	-0.201823	0	0	A375
CPC017_A375_6H:BRD-K79930101-300-01-1:10	GW-583340	10 μM	6 h	-0.201668	0	0	A375
DOS046_A375_24H:BRD-K82637111-001-01-9:5	BRD-K82637111	5 μM	24 h	-0.201664	0	0	A375
DOS058_A375_24H:BRD-K44289311-019-01-6:5	BRD-K44289311	5 μM	24 h	-0.201663	0	0	A375
CPC006_A375_24H:BRD-K13049116-001-01-6:10	BMS-754807	10 μM	24 h	-0.201542	0	0	A375
CPC015_A375_6H:BRD-A29426959-050-07-4:10	carbinoxamine	10 μM	6 h	-0.201499	0	0	A375
CPC011_A375_6H:BRD-K07237224-001-15-4:10	moclobemide	10 μM	6 h	-0.201435	0	0	A375
CPC009_A375_6H:BRD-K17023947-001-03-8:10	KU-C104254	10 μM	6 h	-0.201345	0	0	A375
CPC013_A375_6H:BRD-A57300602-001-01-3:10	BRD-A57300602	10 μM	6 h	-0.201293	0	0	A375
CPC010_A375_6H:BRD-K37984227-001-03-8:10	BRD-K37984227	10 μM	6 h	-0.201269	0	0	A375
CPC012_A375_6H:BRD-A59985574-003-01-9:10	topotecan	10 μM	6 h	-0.201239	0	0	A375
CPC009_A375_6H:BRD-K54657957-001-01-8:10	BRD-K54657957	10 μM	6 h	-0.201178	0	0	A375
CPC004_A375_6H:BRD-K06543683-066-01-3:10	bisindolylmaleimide-ix	10 μM	6 h	-0.201155	0	0	A375
CPC011_A375_6H:BRD-K00673382-001-12-2:10	famotidine	10 μM	6 h	-0.20115	0	0	A375
DOSBIO002_A375_24H:BRD-K55149044:10	BRD-K55149044	10 μM	24 h	-0.201079	0	0	A375
CPC006_A375_6H:BRD-K28307902-001-10-0:28.96	flutamide	30 μM	6 h	-0.201041	0	0	A375
DOSBIO001_A375_24H:BRD-K49669601:9.903	BRD-K49669601	10 μM	24 h	-0.20079	0	0	A375
CPC005_A375_24H:BRD-A72711497-236-02-0:10	lasalocid	10 μM	24 h	-0.2006	0	0	A375
DOS056_A375_24H:BRD-K70053541-001-01-3:5	BRD-K70053541	5 μM	24 h	-0.200373	0	0	A375
CPC017_A375_6H:BRD-K43330982-001-01-5:10	JTE-013	10 μM	6 h	-0.199117	0	0	A375
CPC011_A375_6H:BRD-K57930253-001-06-6:10	nitrazepam	10 μM	6 h	-0.198976	0	0	A375
CPC013_A375_6H:BRD-K79090631-001-15-7:10	CGP-60474	10 μM	6 h	-0.198969	0	0	A375
CPC005_A375_6H:BRD-A22713669-001-01-9:10	BVT-948	10 μM	6 h	-0.198605	0	0	A375
CPC009_A375_6H:BRD-K55127335-001-05-5:10	BRD-K55127335	10 μM	6 h	-0.198554	0	0	A375
CPC014_A375_6H:BRD-K01253243-001-01-4:10	SB-590885	10 μM	6 h	-0.198463	0	0	A375
CPC011_A375_6H:BRD-K51671335-001-06-4:10	levosulpiride	10 μM	6 h	-0.198018	0	0	A375
CPC013_A375_6H:BRD-K17743125-001-03-5:10	belinostat	10 μM	6 h	-0.197998	0	0	A375
CPC011_A375_6H:BRD-K30563334-001-01-1:10	rifabutin	10 μM	6 h	-0.197993	0	0	A375
CPC014_A375_6H:BRD-K49181186-001-04-4:10	EMF-sumo1-7	10 μM	6 h	-0.19795	0	0	A375
CPC008_A375_6H:BRD-K57238941-001-06-2:10	BRD-K57238941	10 μM	6 h	-0.197066	0	0	A375
DOS058_A375_24H:BRD-K34816161-019-01-9:5	BRD-K34816161	5 μM	24 h	-0.19677	0	0	A375
DOS044_A375_24H:BRD-K56339035-001-01-7:5.01	BRD-K56339035	5 μM	24 h	-0.196715	0	0	A375
CPC004_A375_6H:BRD-A49447682-001-01-6:10	desoximetasone	10 μM	6 h	-0.196504	0	0	A375
CPC009_A375_6H:BRD-K79222491-001-01-5:10	BRD-K79222491	10 μM	6 h	-0.196434	0	0	A375
CPC010_A375_6H:BRD-K39339537-001-18-6:10	epirizole	10 μM	6 h	-0.196327	0	0	A375
CPC014_A375_6H:BRD-K40175214-001-01-7:10	torin-1	10 μM	6 h	-0.196136	0	0	A375
CPC007_A375_24H:BRD-A54194844-001-02-9:10	BRD-A54194844	10 μM	24 h	-0.196049	0	0	A375
CPC006_A375_24H:BRD-A12230535-001-02-6:44.4	nutlin-3	40 μM	24 h	-0.196002	0	0	A375
CPC007_A375_6H:BRD-K49749421-001-06-8:10	BRD-K49749421	10 μM	6 h	-0.195668	0	0	A375
CPC011_A375_6H:BRD-K25310650-001-04-4:10	ormetoprim	10 μM	6 h	-0.195219	0	0	A375
CPC017_A375_6H:BRD-K82823804-001-01-7:10	PD-407824	10 μM	6 h	-0.19508	0	0	A375
CPC008_A375_6H:BRD-A38425832-001-01-4:10	BRD-A38425832	10 μM	6 h	-0.195018	0	0	A375
CPC014_A375_6H:BRD-K77008974-001-01-6:10	WYE-354	10 μM	6 h	-0.19498	0	0	A375
CPC007_A375_24H:BRD-K32821942-001-12-2:10	azathioprine	10 μM	24 h	-0.194599	0	0	A375
CPC011_A375_6H:BRD-K53061490-003-10-5:10	ozagrel	10 μM	6 h	-0.194549	0	0	A375
CPC010_A375_6H:BRD-K93229693-001-03-4:10	BRD-K93229693	10 μM	6 h	-0.19444	0	0	A375
CPC012_A375_6H:BRD-K13810148-001-02-1:10	givinostat	10 μM	6 h	-0.19444	0	0	A375
CPC010_A375_6H:BRD-K69569876-001-05-7:10	BRD-K69569876	10 μM	6 h	-0.19365	0	0	A375
CPC011_A375_6H:BRD-K44779798-001-05-7:10	miglitol	10 μM	6 h	-0.193415	0	0	A375
CPC010_A375_6H:BRD-K92000912-001-08-4:10	AM-251	10 μM	6 h	-0.193109	0	0	A375
CPC013_A375_6H:BRD-A02333338-001-01-1:10	cyclopamine	10 μM	6 h	-0.192703	0	0	A375
CPC012_A375_6H:BRD-K30993697-001-01-1:10	SC-I-004	10 μM	6 h	-0.192242	0	0	A375
PCLB001_A375_6H:BRD-K19326298-001-02-0:10	MW-SHH-250	10 μM	6 h	-0.192229	0	0	A375
CPC011_A375_6H:BRD-K28849549-001-09-2:10	mesalazine	10 μM	6 h	-0.192216	0	0	A375
CPC013_A375_6H:BRD-K74931283-001-01-8:10	BRD-K74931283	10 μM	6 h	-0.192207	0	0	A375
CPC009_A375_6H:BRD-A11087911-001-05-8:10	BRD-A11087911	10 μM	6 h	-0.192011	0	0	A375
DOS052_A375_24H:BRD-K16117792-001-01-9:4.93	BRD-K16117792	5 μM	24 h	-0.191947	0	0	A375
CPC006_A375_24H:BRD-K93725829-001-01-2:0.5	ERK-inhibitor-11E	500 nM	24 h	-0.191679	0	0	A375
CPC008_A375_24H:BRD-K45399554-001-04-0:10	CAM-9-027-3	10 μM	24 h	-0.191554	0	0	A375
CPC014_A375_6H:BRD-K70549064-001-03-3:10	staurosporine	10 μM	6 h	-0.19145	0	0	A375
CPC011_A375_6H:BRD-K04710043-001-14-5:10	hexamethylenebisacetamide	10 μM	6 h	-0.19138	0	0	A375
CPC010_A375_6H:BRD-K04412738-003-05-2:10	tramadol	10 μM	6 h	-0.191191	0	0	A375
CPC011_A375_6H:BRD-K55055802-001-06-0:10	BRD-K55055802	10 μM	6 h	-0.191168	0	0	A375
CPC020_A375_6H:BRD-K88868628-001-01-0:10	iodoacetic-acid	10 μM	6 h	-0.19114	0	0	A375
CPC020_A375_6H:BRD-A93393712-001-01-1:10	CVF-SUMO-14	10 μM	6 h	-0.190984	0	0	A375
PCLB003_A375_24H:BRD-A52530684-003-01-7:10	doxorubicin	10 μM	24 h	-0.190916	0	0	A375
CPC007_A375_6H:BRD-K23673040-001-12-9:10	BRD-K23673040	10 μM	6 h	-0.190801	0	0	A375
CPC011_A375_6H:BRD-K16336526-001-04-2:10	capsaicin	10 μM	6 h	-0.190719	0	0	A375
CPC008_A375_6H:BRD-K23165181-019-01-0:10	BRD-K23165181	10 μM	6 h	-0.190679	0	0	A375
CPC011_A375_6H:BRD-K62858456-003-09-7:10	lomerizine	10 μM	6 h	-0.190407	0	0	A375
DOS056_A375_24H:BRD-K78486523-001-01-9:5	BRD-K78486523	5 μM	24 h	-0.190367	0	0	A375
CPC015_A375_6H:BRD-K22503835-001-06-0:10	scriptaid	10 μM	6 h	-0.190273	0	0	A375
CPC007_A375_24H:BRD-K22210218-001-04-4:10	BRD-K22210218	10 μM	24 h	-0.190045	0	0	A375
CPC009_A375_6H:BRD-K53579868-001-03-9:10	KU-C103882	10 μM	6 h	-0.189831	0	0	A375
DOS049_A375_24H:BRD-K28991565-001-01-8:5	BRD-K28991565	5 μM	24 h	-0.18971	0	0	A375
DOS043_A375_24H:BRD-K00541818-001-01-8:4.89	BRD-K00541818	5 μM	24 h	-0.189656	0	0	A375
CPC010_A375_6H:BRD-K10467831-001-04-1:10	tibolone	10 μM	6 h	-0.189465	0	0	A375
CPC008_A375_24H:BRD-K38061943-019-01-3:10	BRD-K38061943	10 μM	24 h	-0.189363	0	0	A375
CPC006_A375_24H:BRD-A35588707-001-03-0:1.25	teniposide	1 μM	24 h	-0.189085	0	0	A375
CPC006_A375_24H:BRD-A70155556-001-04-4:40	lovastatin	40 μM	24 h	-0.188386	0	0	A375
CPC017_A375_6H:BRD-A38913120-001-01-0:10	BH3I-1	10 μM	6 h	-0.188142	0	0	A375
CPC016_A375_6H:BRD-K80307267-001-02-1:10	tetramethyl-haematoxylone	10 μM	6 h	-0.188114	0	0	A375
CPC010_A375_6H:BRD-K32795028-001-10-9:10	1-benzylimidazole	10 μM	6 h	-0.187984	0	0	A375
CPC013_A375_6H:BRD-K95760042-001-01-8:10	BRD-K95760042	10 μM	6 h	-0.187881	0	0	A375
CPC017_A375_6H:BRD-K12867552-001-01-3:10	PCI-24781	10 μM	6 h	-0.1878	0	0	A375
CPC013_A375_6H:BRD-K70500696-001-01-6:10	KB188-III-56	10 μM	6 h	-0.18741	0	0	A375
CPC006_A375_24H:BRD-K74305673-001-01-3:10	IKK-2-inhibitor-V	10 μM	24 h	-0.187353	0	0	A375
CPC011_A375_6H:BRD-K10961822-001-03-6:10	latanoprost	10 μM	6 h	-0.186964	0	0	A375
CPC009_A375_6H:BRD-K02458594-001-03-9:10	KU-C103869	10 μM	6 h	-0.186963	0	0	A375
CPC011_A375_6H:BRD-K21806131-050-02-5:10	tegaserod	10 μM	6 h	-0.186873	0	0	A375
PCLB001_A375_24H:BRD-K11306851-001-03-7:0.16	MW-SHH-97	100 nM	24 h	-0.186868	0	0	A375
DOS040_A375_24H:BRD-K22428007-001-01-3:4.99	BRD-K22428007	5 μM	24 h	-0.186496	0	0	A375
DOS034_A375_24H:BRD-K51530321-001-02-7:5	BRD-K51530321	5 μM	24 h	-0.186188	0	0	A375
CPC016_A375_6H:BRD-K87990216-001-03-7:10	piretanide	10 μM	6 h	-0.186138	0	0	A375
DOSBIO001_A375_24H:BRD-K75845944:10.0028	BRD-K75845944	10 μM	24 h	-0.185825	0	0	A375
CPC010_A375_6H:BRD-K30536692-001-04-7:10	BRD-K30536692	10 μM	6 h	-0.185737	0	0	A375
CPC011_A375_6H:BRD-K22227508-015-03-9:10	targinine	10 μM	6 h	-0.185694	0	0	A375
DOS042_A375_24H:BRD-K22387508-001-01-5:5.02	BRD-K22387508	5 μM	24 h	-0.185483	0	0	A375
CPC011_A375_6H:BRD-K66412701-001-05-4:10	pazufloxacin	10 μM	6 h	-0.184956	0	0	A375
CPC009_A375_6H:BRD-K90996982-001-01-5:10	BRD-K90996982	10 μM	6 h	-0.184905	0	0	A375
CPC007_A375_6H:BRD-K18761689-001-05-9:10	BRD-K18761689	10 μM	6 h	-0.184799	0	0	A375
CPC011_A375_6H:BRD-K92870997-001-13-8:10	pterostilbene	10 μM	6 h	-0.184755	0	0	A375
DOS041_A375_24H:BRD-K00575273-001-01-4:5.02	BRD-K00575273	5 μM	24 h	-0.184527	0	0	A375
CPC014_A375_6H:BRD-K63923597-001-04-3:10	barasertib-HQPA	10 μM	6 h	-0.184479	0	0	A375
DOS041_A375_24H:BRD-K56581148-001-01-8:5.02	BRD-K56581148	5 μM	24 h	-0.18447	0	0	A375
CPC008_A375_6H:BRD-A31946439-019-01-5:10	BRD-A31946439	10 μM	6 h	-0.184424	0	0	A375
DOS042_A375_24H:BRD-K98240084-001-01-7:5.18	BRD-K98240084	5 μM	24 h	-0.184327	0	0	A375
CPC013_A375_6H:BRD-K11778372-001-01-1:10	BRD-K11778372	10 μM	6 h	-0.184278	0	0	A375
CPC009_A375_6H:BRD-K39580048-001-04-7:10	ARG-A1-2	10 μM	6 h	-0.184075	0	0	A375
CPC009_A375_6H:BRD-K28366633-001-05-2:10	BRD-K28366633	10 μM	6 h	-0.183661	0	0	A375
CPC007_A375_24H:BRD-K51608872-001-15-6:10	BRD-K51608872	10 μM	24 h	-0.183452	0	0	A375
CPC017_A375_6H:BRD-K54759182-003-02-3:10	dosulepin	10 μM	6 h	-0.183422	0	0	A375
CPC010_A375_6H:BRD-K99615199-001-15-1:10	medroxyprogesterone	10 μM	6 h	-0.183361	0	0	A375
CPC011_A375_6H:BRD-K49807096-003-11-4:10	benazepril	10 μM	6 h	-0.183333	0	0	A375
CPC007_A375_6H:BRD-K19433082-001-04-0:10	BRD-K19433082	10 μM	6 h	-0.183272	0	0	A375
CPC011_A375_6H:BRD-A68589262-001-02-7:10	troxipide	10 μM	6 h	-0.183197	0	0	A375
CPC006_A375_6H:BRD-A13122391-001-01-9:0.08	triptolide	100 nM	6 h	-0.183185	0	0	A375
CPC011_A375_6H:BRD-K08547377-311-11-2:10	irinotecan	10 μM	6 h	-0.183147	0	0	A375
CPC005_A375_6H:BRD-A94675310-003-01-2:10	BRD-A94675310	10 μM	6 h	-0.1831	0	0	A375
CPC007_A375_6H:BRD-K51973945-001-05-8:10	BRD-K51973945	10 μM	6 h	-0.182985	0	0	A375
CPC009_A375_6H:BRD-K11778076-001-01-0:10	BRD-K11778076	10 μM	6 h	-0.182955	0	0	A375
CPC010_A375_6H:BRD-K71671265-001-05-6:10	JAS07-002	10 μM	6 h	-0.182837	0	0	A375
DOS049_A375_24H:BRD-K12977357-001-01-7:5	BRD-K12977357	5 μM	24 h	-0.182643	0	0	A375
CPC006_A375_24H:BRD-A19633847-050-20-6:10	perhexiline	10 μM	24 h	-0.182346	0	0	A375
CPC011_A375_6H:BRD-A44133049-003-04-5:10	azasetron	10 μM	6 h	-0.182343	0	0	A375
CPC016_A375_6H:BRD-K18574842-323-03-3:10	nafcillin	10 μM	6 h	-0.182311	0	0	A375
CPC016_A375_6H:BRD-K94920105-001-01-3:10	DR-2313	10 μM	6 h	-0.182131	0	0	A375
DOS046_A375_24H:BRD-K70330256-001-01-0:5	BRD-K70330256	5 μM	24 h	-0.182019	0	0	A375
CPC010_A375_6H:BRD-K01265221-001-05-5:10	BRD-K01265221	10 μM	6 h	-0.18199	0	0	A375
CPC005_A375_6H:BRD-A78942461-003-01-3:10	ICI-118551	10 μM	6 h	-0.181769	0	0	A375
CPC014_A375_6H:BRD-K19220233-001-01-5:10	JNK-9L	10 μM	6 h	-0.181524	0	0	A375
CPC014_A375_6H:BRD-K30743633-001-06-6:10	TCPOBOP	10 μM	6 h	-0.181511	0	0	A375
CPC010_A375_6H:BRD-K13926615-048-05-3:10	vardenafil	10 μM	6 h	-0.181492	0	0	A375
CPC011_A375_6H:BRD-K06557128-001-03-9:10	voriconazole	10 μM	6 h	-0.181388	0	0	A375
DOS048_A375_24H:BRD-K94646939-001-01-6:4.99	BRD-K94646939	5 μM	24 h	-0.181348	0	0	A375
CPC012_A375_6H:BRD-K92863101-001-01-1:10	BRD-K92863101	10 μM	6 h	-0.181315	0	0	A375
DOS041_A375_24H:BRD-K16974571-001-01-0:5.02	BRD-K16974571	5 μM	24 h	-0.180997	0	0	A375
DOS052_A375_24H:BRD-K96274292-001-01-6:5.06	BRD-K96274292	5 μM	24 h	-0.180872	0	0	A375
PCLB001_A375_24H:BRD-K73037408-001-01-5:10	KUC111774N	10 μM	24 h	-0.180548	0	0	A375
CPC009_A375_6H:BRD-K51302260-001-03-2:10	KU-C103871	10 μM	6 h	-0.180514	0	0	A375
CPC008_A375_6H:BRD-K42021584-001-01-3:10	BRD-K42021584	10 μM	6 h	-0.180247	0	0	A375
CPC007_A375_6H:BRD-K59273480-001-06-4:10	propentofylline	10 μM	6 h	-0.18013	0	0	A375
CPC017_A375_6H:BRD-K60762818-003-15-3:10	desipramine	10 μM	6 h	-0.179998	0	0	A375
CPC007_A375_6H:BRD-K39208132-001-04-2:10	BRD-K39208132	10 μM	6 h	-0.179904	0	0	A375
CPC010_A375_6H:BRD-A17448384-001-07-0:10	beclometasone	10 μM	6 h	-0.179879	0	0	A375
CPC018_A375_6H:BRD-K78126613-001-16-0:10	menadione	10 μM	6 h	-0.179852	0	0	A375
CPC015_A375_6H:BRD-K98490050-001-01-8:10	amsacrine	10 μM	6 h	-0.179681	0	0	A375
CPC012_A375_6H:BRD-K71935468-001-01-9:10	BRD-K71935468	10 μM	6 h	-0.179664	0	0	A375
CPC005_A375_6H:BRD-A60294240-001-02-9:10	tribenoside	10 μM	6 h	-0.179613	0	0	A375
DOS043_A375_24H:BRD-K57962577-001-01-9:4.76	BRD-K57962577	5 μM	24 h	-0.179609	0	0	A375
CPC013_A375_6H:BRD-K61359235-001-01-6:10	BRD-K61359235	10 μM	6 h	-0.179575	0	0	A375
CPC014_A375_6H:BRD-K00184207-001-03-2:10	GR-206	10 μM	6 h	-0.17952	0	0	A375
CPC011_A375_6H:BRD-K39621635-001-04-8:10	artemether	10 μM	6 h	-0.179391	0	0	A375
CPC005_A375_6H:BRD-A95869247-001-14-5:10	indapamide	10 μM	6 h	-0.179286	0	0	A375
CPC011_A375_6H:BRD-K13800121-236-02-5:10	parecoxib	10 μM	6 h	-0.1791	0	0	A375
CPC011_A375_6H:BRD-K46435977-003-08-7:10	valaciclovir	10 μM	6 h	-0.178867	0	0	A375
DOSBIO001_A375_24H:BRD-K28934562:10.0731	BRD-K28934562	10 μM	24 h	-0.178864	0	0	A375
CPC005_A375_6H:BRD-K83302049-003-01-2:10	protopine	10 μM	6 h	-0.178782	0	0	A375
DOS056_A375_24H:BRD-K53717189-001-01-1:5	BRD-K53717189	5 μM	24 h	-0.178677	0	0	A375
CPC005_A375_24H:BRD-K50836978-001-01-7:10	purvalanol-a	10 μM	24 h	-0.178677	0	0	A375
CPC013_A375_6H:BRD-K87909389-001-02-0:10	alvocidib	10 μM	6 h	-0.178584	0	0	A375
CPC011_A375_6H:BRD-K25394294-001-11-5:10	oxaprozin	10 μM	6 h	-0.17854	0	0	A375
CPC005_A375_6H:BRD-K19507340-001-03-1:10	megestrol	10 μM	6 h	-0.178524	0	0	A375
DOS048_A375_24H:BRD-K43851624-001-01-4:5.03	BRD-K43851624	5 μM	24 h	-0.178481	0	0	A375
PRISM001_A375_24H:BRD-K01737880:10	BRD-K01737880	10 μM	24 h	-0.178474	0	0	A375
PCLB001_A375_24H:BRD-K16582605-001-02-9:10	WY-01-034	10 μM	24 h	-0.178304	0	0	A375
CPC009_A375_6H:BRD-K68535470-001-06-7:10	STK-222600	10 μM	6 h	-0.178277	0	0	A375
DOS044_A375_24H:BRD-K79529972-001-01-1:5.02	BRD-K79529972	5 μM	24 h	-0.178108	0	0	A375
PCLB003_A375_24H:BRD-K75295174-001-01-9:10	alisertib	10 μM	24 h	-0.178064	0	0	A375
CPC008_A375_24H:BRD-K66032149-001-01-9:10	VU-0365117-1	10 μM	24 h	-0.178029	0	0	A375
CPC019_A375_6H:BRD-K81249836-001-01-8:10	BRD-K81249836	10 μM	6 h	-0.177993	0	0	A375
CPC014_A375_6H:BRD-K83988098-003-01-8:10	alvespimycin	10 μM	6 h	-0.177795	0	0	A375
DOS049_A375_24H:BRD-K05387676-001-01-2:5	BRD-K05387676	5 μM	24 h	-0.177779	0	0	A375
CPC014_A375_6H:BRD-A26002865-001-01-5:10	verrucarin-a	10 μM	6 h	-0.177664	0	0	A375
CPC011_A375_6H:BRD-A93659613-051-05-1:10	GR-89696	10 μM	6 h	-0.177609	0	0	A375
DOS056_A375_24H:BRD-K44242139-001-01-3:5	BRD-K44242139	5 μM	24 h	-0.177581	0	0	A375
DOS043_A375_24H:BRD-K15935695-001-01-3:5	BRD-K15935695	5 μM	24 h	-0.17758	0	0	A375
CPC011_A375_6H:BRD-K47936004-311-02-0:10	piribedil	10 μM	6 h	-0.177453	0	0	A375
DOS044_A375_24H:BRD-K22674439-001-03-6:5.03	BRD-K22674439	5 μM	24 h	-0.177052	0	0	A375
CPC006_A375_24H:BRD-K05653692-003-04-7:64	DL-PDMP	60 μM	24 h	-0.177008	0	0	A375
PCLB001_A375_24H:BRD-A33746814-001-01-0:10	avicin-g	10 μM	24 h	-0.176915	0	0	A375
CPC005_A375_24H:BRD-K21680192-300-06-0:10	mitoxantrone	10 μM	24 h	-0.176848	0	0	A375
CPC006_A375_6H:BRD-K19216856-001-02-7:88.8	epigallocatechin	90 μM	6 h	-0.176124	0	0	A375
BRAF001_A375_6H:BRD-K53737926-003-18-7:0.625	amitriptyline	500 nM	6 h	-0.176073	0	0	A375
CPC005_A375_6H:BRD-A47494775-003-03-0:10	dipivefrine	10 μM	6 h	-0.176003	0	0	A375
CPC007_A375_6H:BRD-K40758391-001-06-4:10	BRD-K40758391	10 μM	6 h	-0.176	0	0	A375
DOS033_A375_24H:BRD-K38700430-001-01-4:5.02	BRD-K38700430	5 μM	24 h	-0.175975	0	0	A375
CPC005_A375_6H:BRD-A66563878-003-01-8:10	medetomidine	10 μM	6 h	-0.175864	0	0	A375
CPC008_A375_6H:BRD-K98676510-001-01-6:10	BRD-K98676510	10 μM	6 h	-0.175754	0	0	A375
CPC011_A375_6H:BRD-K73196317-003-10-6:10	urapidil	10 μM	6 h	-0.175707	0	0	A375
CPC009_A375_6H:BRD-K21482967-003-01-5:10	BRD-K21482967	10 μM	6 h	-0.175706	0	0	A375
CPC007_A375_24H:BRD-K37940862-004-03-4:10	BRD-K37940862	10 μM	24 h	-0.175684	0	0	A375
CPC006_A375_6H:BRD-K92301463-001-03-0:10	16,16-dimethylprostaglandin-e2	10 μM	6 h	-0.175599	0	0	A375
CPC010_A375_6H:BRD-K56478238-001-04-2:10	BRD-K56478238	10 μM	6 h	-0.175568	0	0	A375
CPC009_A375_6H:BRD-A47598013-001-03-4:10	citalopram	10 μM	6 h	-0.175369	0	0	A375
CPC005_A375_24H:BRD-K49294207-300-01-2:10	BIBU-1361	10 μM	24 h	-0.175131	0	0	A375
DOS044_A375_24H:BRD-K80568112-001-01-7:5	BRD-K80568112	5 μM	24 h	-0.174953	0	0	A375
CPC013_A375_6H:BRD-K44812652-001-01-0:10	BRD-K44812652	10 μM	6 h	-0.174951	0	0	A375
CPC014_A375_6H:BRD-K13514097-001-01-2:10	everolimus	10 μM	6 h	-0.174804	0	0	A375
CPC007_A375_6H:BRD-K30381384-001-05-8:10	BRD-K30381384	10 μM	6 h	-0.174711	0	0	A375
CPC020_A375_6H:BRD-K10799896-001-18-9:10	clobetasol	10 μM	6 h	-0.174576	0	0	A375
DOSBIO002_A375_24H:BRD-K74461819:9.98767	BRD-K74461819	10 μM	24 h	-0.174572	0	0	A375
CPC007_A375_6H:BRD-A02747686-001-02-8:10	BRD-A02747686	10 μM	6 h	-0.174347	0	0	A375
CPC014_A375_6H:BRD-A50454580-001-01-1:10	PD-0325901	10 μM	6 h	-0.174317	0	0	A375
CPC016_A375_6H:BRD-K70778732-003-15-0:10	trazodone	10 μM	6 h	-0.174237	0	0	A375
CPC005_A375_24H:BRD-A84481105-003-17-2:10	thioridazine	10 μM	24 h	-0.174047	0	0	A375
DOS048_A375_24H:BRD-K57754556-001-01-5:4.97	BRD-K57754556	5 μM	24 h	-0.173954	0	0	A375
CPC013_A375_6H:BRD-K24014699-001-01-2:10	BRD-K24014699	10 μM	6 h	-0.173793	0	0	A375
DOS058_A375_24H:BRD-K45223163-019-01-3:5	BRD-K45223163	5 μM	24 h	-0.173733	0	0	A375
DOS034_A375_24H:BRD-K05351800-001-01-7:5.01	BRD-K05351800	5 μM	24 h	-0.173687	0	0	A375
CPC007_A375_6H:BRD-K53142391-001-06-5:10	BRD-K53142391	10 μM	6 h	-0.173637	0	0	A375
CPC008_A375_24H:BRD-K30351863-019-01-2:10	BRD-K30351863	10 μM	24 h	-0.173619	0	0	A375
DOS041_A375_24H:BRD-K63531989-001-01-6:5	BRD-K63531989	5 μM	24 h	-0.173556	0	0	A375
CPC006_A375_24H:BRD-K33272502-001-01-2:40	DG-041	40 μM	24 h	-0.173531	0	0	A375
PCLB002_A375_24H:BRD-K68488863:10	ENMD-2076	10 μM	24 h	-0.173473	0	0	A375
CPC010_A375_6H:BRD-K51155404-019-03-3:10	BRD-K51155404	10 μM	6 h	-0.173461	0	0	A375
DOS049_A375_24H:BRD-K76880231-004-01-2:5	BRD-K76880231	5 μM	24 h	-0.173406	0	0	A375
DOS048_A375_24H:BRD-K70003473-001-01-0:5.04	BRD-K70003473	5 μM	24 h	-0.173333	0	0	A375
CPC010_A375_6H:BRD-K70578146-001-03-4:10	dactinomycin	10 μM	6 h	-0.173309	0	0	A375
CPC013_A375_6H:BRD-K67867734-001-01-8:10	SEW-00445	10 μM	6 h	-0.172996	0	0	A375
CPC009_A375_6H:BRD-K77547920-001-04-2:10	BRD-K77547920	10 μM	6 h	-0.172862	0	0	A375
DOS052_A375_24H:BRD-K07660364-001-01-7:4.91	BRD-K07660364	5 μM	24 h	-0.172709	0	0	A375
CPC011_A375_6H:BRD-K21733600-001-11-7:10	rofecoxib	10 μM	6 h	-0.172632	0	0	A375
PCLB003_A375_24H:BRD-K04466929-001-05-1:0.04	Merck60	0.04 μM	24 h	-0.172597	0	0	A375
CPC005_A375_24H:BRD-K51018020-001-01-9:10	VAMA-37	10 μM	24 h	-0.172521	0	0	A375
CPC008_A375_24H:BRD-K42455570-001-04-3:10	BRD-K42455570	10 μM	24 h	-0.172329	0	0	A375
CPC011_A375_6H:BRD-A29485665-001-07-8:10	bicalutamide	10 μM	6 h	-0.172255	0	0	A375
DOS046_A375_24H:BRD-K68906258-001-01-9:5	BRD-K68906258	5 μM	24 h	-0.171987	0	0	A375
DOS042_A375_24H:BRD-K62014585-001-01-2:4.98	BRD-K62014585	5 μM	24 h	-0.171899	0	0	A375
CPC005_A375_6H:BRD-K42142750-001-04-9:10	retrorsine	10 μM	6 h	-0.171851	0	0	A375
CPC013_A375_6H:BRD-K70086257-001-01-7:10	BRD-K70086257	10 μM	6 h	-0.171851	0	0	A375
DOS048_A375_24H:BRD-K96707310-001-01-3:5	BRD-K96707310	5 μM	24 h	-0.17176	0	0	A375
CPC011_A375_6H:BRD-K97752965-001-10-7:10	nicorandil	10 μM	6 h	-0.171758	0	0	A375
CPC012_A375_6H:BRD-K22828860-001-01-0:10	BRD-K22828860	10 μM	6 h	-0.171756	0	0	A375
CPC020_A375_6H:BRD-A80638690-001-02-8:10	floxuridine	10 μM	6 h	-0.171656	0	0	A375
CPC005_A375_6H:BRD-A10903566-003-02-8:10	imiloxan	10 μM	6 h	-0.171537	0	0	A375
DOS058_A375_24H:BRD-K37795473-019-01-5:5	BRD-K37795473	5 μM	24 h	-0.171367	0	0	A375
CPC010_A375_6H:BRD-A14208071-004-16-4:10	oxyphenonium	10 μM	6 h	-0.171344	0	0	A375
CPC008_A375_24H:BRD-K95337198-001-04-1:10	BRD-K95337198	10 μM	24 h	-0.171324	0	0	A375
DOS058_A375_24H:BRD-K23147993-019-01-6:5	BRD-K23147993	5 μM	24 h	-0.171179	0	0	A375
PCLB002_A375_24H:BRD-K93367411:33.33	BRD-K93367411	33.33 μM	24 h	-0.171157	0	0	A375
CPC011_A375_6H:BRD-K47278471-003-21-4:10	diphenhydramine	10 μM	6 h	-0.17113	0	0	A375
PCLB001_A375_6H:BRD-K90370028-001-01-9:0.16	AT1-SHH-09	100 nM	6 h	-0.171123	0	0	A375
CPC010_A375_6H:BRD-A56245458-001-07-3:10	reichstein	10 μM	6 h	-0.170939	0	0	A375
DOSBIO002_A375_24H:BRD-K91946056:10.036	BRD-K91946056	10 μM	24 h	-0.170794	0	0	A375
DOS053_A375_24H:BRD-K72267874-001-01-4:4.92	BRD-K72267874	5 μM	24 h	-0.170647	0	0	A375
CPC012_A375_6H:BRD-A36165599-001-01-1:10	BRD-A36165599	10 μM	6 h	-0.170554	0	0	A375
CPC008_A375_6H:BRD-K75784474-019-01-1:10	BRD-K75784474	10 μM	6 h	-0.170441	0	0	A375
DOS043_A375_24H:BRD-K69947829-001-02-0:5.01	BRD-K69947829	5 μM	24 h	-0.170415	0	0	A375
CPC008_A375_6H:BRD-K32944375-019-01-3:10	BRD-K32944375	10 μM	6 h	-0.170297	0	0	A375
CPC017_A375_6H:BRD-K47693913-001-02-4:10	evoxine	10 μM	6 h	-0.170281	0	0	A375
DOSBIO001_A375_24H:BRD-K48222931:10.2274	BRD-K48222931	10 μM	24 h	-0.170031	0	0	A375
CPC005_A375_6H:BRD-K78599730-001-03-4:10	manumycin-a	10 μM	6 h	-0.170004	0	0	A375
CPC006_A375_6H:BRD-A67788537-001-01-7:120	salermide	100 μM	6 h	-0.169868	0	0	A375
CPC012_A375_6H:BRD-K74761218-001-03-5:10	WT-171	10 μM	6 h	-0.169865	0	0	A375
CPC011_A375_6H:BRD-K33211335-337-11-0:10	dextromethorphan	10 μM	6 h	-0.169846	0	0	A375
DOSBIO002_A375_24H:BRD-K87125912:9.98177	BRD-K87125912	10 μM	24 h	-0.169801	0	0	A375
DOS041_A375_24H:BRD-K17181267-001-01-0:5.02	BRD-K17181267	5 μM	24 h	-0.169746	0	0	A375
DOS040_A375_24H:BRD-K88391199-001-01-2:5.01	BRD-K88391199	5 μM	24 h	-0.169727	0	0	A375
CPC007_A375_24H:BRD-K88198340-001-05-0:10	BRD-K88198340	10 μM	24 h	-0.169451	0	0	A375
DOS039_A375_24H:BRD-K61873274-001-01-8:4.93	BRD-K61873274	5 μM	24 h	-0.169301	0	0	A375
CPC009_A375_6H:BRD-K30649484-015-07-3:10	mafenide	10 μM	6 h	-0.169091	0	0	A375
DOS047_A375_24H:BRD-K27161555-001-01-1:5.06	BRD-K27161555	5 μM	24 h	-0.169075	0	0	A375
CPC017_A375_6H:BRD-K43389675-001-01-3:10	daunorubicin	10 μM	6 h	-0.169042	0	0	A375
CPC006_A375_24H:BRD-K35960502-001-10-1:10	niclosamide	10 μM	24 h	-0.169	0	0	A375
CPC008_A375_6H:BRD-K26815099-019-01-8:10	BRD-K26815099	10 μM	6 h	-0.168996	0	0	A375
CPC014_A375_6H:BRD-K51313569-001-02-9:10	palbociclib	10 μM	6 h	-0.168913	0	0	A375
DOS058_A375_24H:BRD-K14031425-019-01-1:5	BRD-K14031425	5 μM	24 h	-0.168865	0	0	A375
CPC009_A375_6H:BRD-A17718497-001-03-9:10	BRD-A17718497	10 μM	6 h	-0.168834	0	0	A375
CPC008_A375_6H:BRD-K24156250-001-06-1:10	BRD-K24156250	10 μM	6 h	-0.16858	0	0	A375
CPC010_A375_6H:BRD-K23383398-001-04-0:10	T-0901317	10 μM	6 h	-0.168314	0	0	A375
CPC007_A375_6H:BRD-K86682249-001-08-1:10	BRD-K86682249	10 μM	6 h	-0.168274	0	0	A375
CPC011_A375_6H:BRD-K84955386-001-03-7:10	hyperoside	10 μM	6 h	-0.168039	0	0	A375
DOS044_A375_24H:BRD-K60144139-001-02-8:5.07	BRD-K60144139	5 μM	24 h	-0.168038	0	0	A375
DOS048_A375_24H:BRD-K06217925-001-01-9:4.99	BRD-K06217925	5 μM	24 h	-0.167758	0	0	A375
CPC017_A375_6H:BRD-K04414442-001-03-4:10	SB-222200	10 μM	6 h	-0.167605	0	0	A375
CPC007_A375_6H:BRD-K66438357-001-05-6:10	BRD-K66438357	10 μM	6 h	-0.167581	0	0	A375
DOS043_A375_24H:BRD-K63521663-001-01-0:5.17	BRD-K63521663	5 μM	24 h	-0.167503	0	0	A375
DOS047_A375_24H:BRD-K32897268-001-01-1:5.04	BRD-K32897268	5 μM	24 h	-0.167443	0	0	A375
CPC020_A375_6H:BRD-K08806317-001-02-1:10	timolol	10 μM	6 h	-0.167337	0	0	A375
DOS047_A375_24H:BRD-K74671783-001-01-5:4.93	SA-1459008	5 μM	24 h	-0.167333	0	0	A375
DOS052_A375_24H:BRD-K43931839-001-02-3:5	BRD-K43931839	5 μM	24 h	-0.167182	0	0	A375
CPC014_A375_6H:BRD-K62459624-001-07-9:10	BRD-K62459624	10 μM	6 h	-0.167138	0	0	A375
PCLB001_A375_6H:BRD-A69592287-001-01-3:10	oxetane	10 μM	6 h	-0.167089	0	0	A375
CPC010_A375_6H:BRD-K06186994-001-05-3:10	BRD-K06186994	10 μM	6 h	-0.167079	0	0	A375
CPC009_A375_6H:BRD-K49577446-001-09-8:10	flunisolide	10 μM	6 h	-0.167044	0	0	A375
CPC007_A375_6H:BRD-K10057859-001-02-1:10	BRD-K10057859	10 μM	6 h	-0.16703	0	0	A375
PRISM001_A375_24H:CMAP-AZD-1152HQPA:1.25	AZD-1152HQPA	1 μM	24 h	-0.166912	0	0	A375
DOSBIO001_A375_24H:BRD-K79947405:10.0148	BRD-K79947405	10 μM	24 h	-0.166902	0	0	A375
CPC009_A375_6H:BRD-K74501079-001-13-2:10	azithromycin	10 μM	6 h	-0.166736	0	0	A375
DOS039_A375_24H:BRD-K11468634-001-01-3:5.12	BRD-K11468634	5 μM	24 h	-0.166687	0	0	A375
DOSBIO001_A375_24H:BRD-K08412560:10.0896	BRD-K08412560	10 μM	24 h	-0.166669	0	0	A375
CPC005_A375_24H:BRD-K55127134-300-07-0:10	fluphenazine	10 μM	24 h	-0.166627	0	0	A375
DOS056_A375_24H:BRD-K16930585-001-01-6:5	BRD-K16930585	5 μM	24 h	-0.166552	0	0	A375
CPC007_A375_6H:BRD-K67880862-001-06-4:10	PSH-027	10 μM	6 h	-0.166536	0	0	A375
PCLB001_A375_6H:BRD-K07572174-001-22-0:10	curcumin	10 μM	6 h	-0.166479	0	0	A375
CPC006_A375_6H:BRD-K93176058-001-02-8:10	AC-55649	10 μM	6 h	-0.166328	0	0	A375
CPC007_A375_6H:BRD-K60202068-001-05-2:10	BRD-K60202068	10 μM	6 h	-0.166264	0	0	A375
CPC012_A375_6H:BRD-K76425827-001-01-2:10	BRD-K76425827	10 μM	6 h	-0.166167	0	0	A375
CPC009_A375_6H:BRD-K76612204-001-01-8:10	BRD-K76612204	10 μM	6 h	-0.166125	0	0	A375
CPC018_A375_6H:BRD-K87158025-003-01-2:10	benzamil	10 μM	6 h	-0.165969	0	0	A375
CPC006_A375_6H:BRD-K09778810-001-03-1:10	FGIN-1-27	10 μM	6 h	-0.165924	0	0	A375
DOS046_A375_24H:BRD-K58446572-001-01-7:5	BRD-K58446572	5 μM	24 h	-0.165901	0	0	A375
CPC006_A375_24H:BRD-K68143200-001-05-9:10	NSC-95397	10 μM	24 h	-0.165663	0	0	A375
CPC019_A375_6H:BRD-K99756483-001-01-8:10	BRD-K99756483	10 μM	6 h	-0.165529	0	0	A375
CPC005_A375_6H:BRD-K09497549-001-03-6:10	kawain	10 μM	6 h	-0.165276	0	0	A375
CPC017_A375_6H:BRD-K68341547-003-01-6:10	W-9	10 μM	6 h	-0.164848	0	0	A375
CPC005_A375_6H:BRD-K98297262-001-01-1:10	BRD-K98297262	10 μM	6 h	-0.164695	0	0	A375
CPC013_A375_6H:BRD-K13390322-001-01-4:10	AT-7519	10 μM	6 h	-0.164654	0	0	A375
CPC013_A375_6H:BRD-K05520923-001-02-7:10	BRD-K05520923	10 μM	6 h	-0.164602	0	0	A375
DOS049_A375_24H:BRD-K48183516-001-01-8:5	BRD-K48183516	5 μM	24 h	-0.164591	0	0	A375
CPC017_A375_6H:BRD-A14574269-051-01-4:10	UB-165	10 μM	6 h	-0.16452	0	0	A375
CPC014_A375_6H:BRD-K83794624-001-01-7:10	pirarubicin	10 μM	6 h	-0.164471	0	0	A375
CPC009_A375_6H:BRD-A26384407-001-21-0:10	chlorthalidone	10 μM	6 h	-0.164414	0	0	A375
CPC007_A375_24H:BRD-A47816767-001-11-1:10	BRD-A47816767	10 μM	24 h	-0.164375	0	0	A375
CPC020_A375_6H:BRD-K53308430-001-02-4:10	SA-1017940	10 μM	6 h	-0.164371	0	0	A375
CPC006_A375_24H:BRD-A36630025-001-02-6:0.35	SN-38	500 nM	24 h	-0.164243	0	0	A375
DOSBIO001_A375_24H:BRD-K73008154:9.91582	BRD-K73008154	10 μM	24 h	-0.164171	0	0	A375
PCLB001_A375_6H:BRD-K45028728-001-02-0:0.16	WY-01-045	100 nM	6 h	-0.164125	0	0	A375
DOS044_A375_24H:BRD-K70072942-001-02-6:5.02	BRD-K70072942	5 μM	24 h	-0.164059	0	0	A375
CPC016_A375_6H:BRD-K78122587-300-01-9:10	NNC-55-0396	10 μM	6 h	-0.163929	0	0	A375
CPC014_A375_6H:BRD-K72420232-001-02-4:10	WZ-4002	10 μM	6 h	-0.163791	0	0	A375
CPC008_A375_24H:BRD-K14749055-001-01-3:10	BRD-K14749055	10 μM	24 h	-0.163783	0	0	A375
CPC007_A375_6H:BRD-K72676786-001-05-4:10	BRD-K72676786	10 μM	6 h	-0.163744	0	0	A375
CPC016_A375_6H:BRD-K37312348-001-06-9:10	kenpaullone	10 μM	6 h	-0.163668	0	0	A375
CPC014_A375_6H:BRD-K33926001-001-01-9:10	BRD-K33926001	10 μM	6 h	-0.163652	0	0	A375
CPC011_A375_6H:BRD-K98530306-003-12-6:10	clonidine	10 μM	6 h	-0.163581	0	0	A375
CPC019_A375_6H:BRD-K68007270-001-01-0:10	BRD-K68007270	10 μM	6 h	-0.163298	0	0	A375
CPC017_A375_6H:BRD-K11927976-050-01-1:10	ER-27319	10 μM	6 h	-0.163075	0	0	A375
DOS049_A375_24H:BRD-K51395794-001-01-5:5	BRD-K51395794	5 μM	24 h	-0.163035	0	0	A375
CPC007_A375_6H:BRD-K93443135-001-05-2:10	BRD-K93443135	10 μM	6 h	-0.162905	0	0	A375
CPC006_A375_24H:BRD-K61662457-001-02-2:20	CAY-10594	20 μM	24 h	-0.162853	0	0	A375
CPC011_A375_6H:BRD-K95808480-001-04-8:10	taxifolin	10 μM	6 h	-0.162746	0	0	A375
CPC009_A375_6H:BRD-K24705176-001-01-7:10	BRD-K24705176	10 μM	6 h	-0.162742	0	0	A375
DOS058_A375_24H:BRD-K27760381-001-01-0:5	BRD-K27760381	5 μM	24 h	-0.162675	0	0	A375
CPC013_A375_6H:BRD-K11636097-001-01-5:10	JNJ-7706621	10 μM	6 h	-0.162588	0	0	A375
CPC016_A375_6H:BRD-K41337261-003-01-0:10	ZM-306416	10 μM	6 h	-0.162373	0	0	A375
DOS039_A375_24H:BRD-K84691165-001-01-9:4.92	BRD-K84691165	5 μM	24 h	-0.162284	0	0	A375
CPC007_A375_6H:BRD-K84203638-001-05-3:10	BRD-K84203638	10 μM	6 h	-0.162247	0	0	A375
CPC011_A375_6H:BRD-K27316855-001-09-1:10	calcitriol	10 μM	6 h	-0.162245	0	0	A375
CPC016_A375_6H:BRD-A06352508-001-02-9:10	SB-218078	10 μM	6 h	-0.162208	0	0	A375
CPC008_A375_6H:BRD-K33720394-001-01-1:10	BRD-K33720394	10 μM	6 h	-0.162001	0	0	A375
DOS046_A375_24H:BRD-K41335306-001-01-5:5	BRD-K41335306	5 μM	24 h	-0.161989	0	0	A375
CPC010_A375_6H:BRD-K04993501-002-01-7:10	cefixime	10 μM	6 h	-0.161898	0	0	A375
DOS039_A375_24H:BRD-K63424643-001-01-2:4.99	BRD-K63424643	5 μM	24 h	-0.161777	0	0	A375
CPC010_A375_6H:BRD-K73589401-001-20-2:10	corticosterone	10 μM	6 h	-0.161699	0	0	A375
CPC015_A375_6H:BRD-K04548931-003-05-8:10	epirubicin	10 μM	6 h	-0.161564	0	0	A375
CPC009_A375_6H:BRD-K96621343-001-04-1:10	BRD-K96621343	10 μM	6 h	-0.161415	0	0	A375
CPC007_A375_6H:BRD-K54503842-001-05-4:10	JAS07-010	10 μM	6 h	-0.161359	0	0	A375
CPC006_A375_6H:BRD-A02481876-001-09-9:60	importazole	60 μM	6 h	-0.161338	0	0	A375
CPC010_A375_6H:BRD-K31471398-311-04-6:10	dihydrexidine	10 μM	6 h	-0.161314	0	0	A375
CPC020_A375_6H:BRD-K94173926-001-01-6:10	I-505056	10 μM	6 h	-0.161266	0	0	A375
DOS052_A375_24H:BRD-K61387428-001-01-4:4.98	BRD-K61387428	5 μM	24 h	-0.161241	0	0	A375
CPC020_A375_6H:BRD-A93255169-001-20-0:10	thalidomide	10 μM	6 h	-0.161194	0	0	A375
CPC010_A375_6H:BRD-A55962179-001-15-5:10	omeprazole	10 μM	6 h	-0.161162	0	0	A375
CPC011_A375_6H:BRD-A86044036-001-22-4:10	flurbiprofen-(+/-)	10 μM	6 h	-0.161157	0	0	A375
CPC008_A375_24H:BRD-A95937159-001-02-1:10	BRD-A95937159	10 μM	24 h	-0.161153	0	0	A375
DOS034_A375_24H:BRD-K15050703-001-01-1:4.99	BRD-K15050703	5 μM	24 h	-0.161137	0	0	A375
CPC010_A375_6H:BRD-U86222656-000-01-7:10	BRD-U86222656	10 μM	6 h	-0.161128	0	0	A375
CPC009_A375_6H:BRD-K50907285-001-01-4:10	BRD-K50907285	10 μM	6 h	-0.161103	0	0	A375
CPC007_A375_6H:BRD-K97181089-001-07-6:10	amiloride	10 μM	6 h	-0.161004	0	0	A375
DOS058_A375_24H:BRD-K68121359-019-01-5:5	BRD-K68121359	5 μM	24 h	-0.161	0	0	A375
CPC008_A375_6H:BRD-K10846167-001-01-6:10	BRD-K10846167	10 μM	6 h	-0.160863	0	0	A375
CPC005_A375_24H:BRD-K50841342-001-01-6:10	PAC-1	10 μM	24 h	-0.16081	0	0	A375
CPC009_A375_6H:BRD-A69421747-019-01-1:10	BRD-A69421747	10 μM	6 h	-0.160452	0	0	A375
DOSBIO002_A375_24H:BRD-K63423329:10.1315	BRD-K63423329	10 μM	24 h	-0.160218	0	0	A375
CPC013_A375_6H:BRD-K43739430-001-01-5:10	ST-4029487	10 μM	6 h	-0.160158	0	0	A375
CPC006_A375_24H:BRD-K64890080-001-03-9:10	BI-2536	10 μM	24 h	-0.160141	0	0	A375
DOS052_A375_24H:BRD-K32053117-001-01-4:5.04	BRD-K32053117	5 μM	24 h	-0.160104	0	0	A375
CPC011_A375_6H:BRD-K34437622-001-04-9:10	5-FP	10 μM	6 h	-0.16009	0	0	A375
DOS052_A375_24H:BRD-K48431409-001-01-1:5.07	BRD-K48431409	5 μM	24 h	-0.160065	0	0	A375
CPC011_A375_6H:BRD-K39391626-001-02-3:10	ethylestrenol	10 μM	6 h	-0.159797	0	0	A375
CPC020_A375_6H:BRD-K06009608-001-01-4:10	BRD-K06009608	10 μM	6 h	-0.15966	0	0	A375
DOS040_A375_24H:BRD-K50808811-001-01-7:5.02	BRD-K50808811	5 μM	24 h	-0.159599	0	0	A375
DOS041_A375_24H:BRD-K69197680-001-01-2:5.1	BRD-K69197680	5 μM	24 h	-0.159562	0	0	A375
CPC004_A375_6H:BRD-A51714012-001-03-1:10	venlafaxine	10 μM	6 h	-0.159462	0	0	A375
CPC020_A375_6H:BRD-K74507776-001-01-0:10	BRD-K74507776	10 μM	6 h	-0.159437	0	0	A375
CPC010_A375_6H:BRD-K71103788-003-08-8:10	duloxetine	10 μM	6 h	-0.159409	0	0	A375
CPC009_A375_6H:BRD-K55722623-001-01-3:10	BRD-K55722623	10 μM	6 h	-0.159312	0	0	A375
CPC009_A375_6H:BRD-K84141129-001-01-0:10	VU-0400193-3	10 μM	6 h	-0.159163	0	0	A375
CPC005_A375_24H:BRD-A53416814-001-01-5:10	ceramide	10 μM	24 h	-0.159148	0	0	A375
CPC011_A375_6H:BRD-K84566043-004-04-9:10	fenpiverinium	10 μM	6 h	-0.159088	0	0	A375
CPC010_A375_6H:BRD-K67783091-003-05-1:10	haloperidol	10 μM	6 h	-0.159054	0	0	A375
CPC014_A375_6H:BRD-M64432851-001-01-9:10	sunitinib	10 μM	6 h	-0.158915	0	0	A375
CPC007_A375_6H:BRD-A28422330-001-07-7:10	BRD-A28422330	10 μM	6 h	-0.15889	0	0	A375
CPC006_A375_24H:BRD-A71390734-001-01-7:0.08	idarubicin	100 nM	24 h	-0.158878	0	0	A375
DOS054_A375_24H:BRD-K46643133-001-01-6:5	BRD-K46643133	5 μM	24 h	-0.158786	0	0	A375
CPC006_A375_24H:BRD-K19295594-001-08-5:11.1	gossypol	10 μM	24 h	-0.158765	0	0	A375
DOS039_A375_24H:BRD-K91244634-001-01-1:5	BRD-K91244634	5 μM	24 h	-0.158762	0	0	A375
CPC004_A375_6H:BRD-A41519720-001-03-0:10	ezetimibe	10 μM	6 h	-0.158761	0	0	A375
CPC011_A375_6H:BRD-A40639672-234-14-9:10	ketorolac	10 μM	6 h	-0.158595	0	0	A375
CPC006_A375_24H:BRD-A18763547-300-04-8:10	BAX-channel-blocker	10 μM	24 h	-0.158545	0	0	A375
CPC009_A375_6H:BRD-K81814927-001-01-9:10	BRD-K81814927	10 μM	6 h	-0.158457	0	0	A375
CPC013_A375_6H:BRD-K80786583-001-01-5:10	BRD-K80786583	10 μM	6 h	-0.158454	0	0	A375
DOS055_A375_24H:BRD-K68211814-001-01-1:5	BRD-K68211814	5 μM	24 h	-0.15831	0	0	A375
CPC007_A375_24H:BRD-A76641868-001-03-2:10	BRD-A76641868	10 μM	24 h	-0.15826	0	0	A375
CPC011_A375_6H:BRD-A92630576-050-20-9:10	trimebutine	10 μM	6 h	-0.158113	0	0	A375
CPC017_A375_6H:BRD-K84987553-001-01-1:10	MDM2-inhibitor	10 μM	6 h	-0.158067	0	0	A375
DOSBIO001_A375_24H:BRD-K27305650:10	LY-294002	10 μM	24 h	-0.158049	0	0	A375
CPC016_A375_6H:BRD-K60274257-001-01-1:10	dephostatin	10 μM	6 h	-0.157946	0	0	A375
CPC007_A375_6H:BRD-K12540328-001-05-0:10	BRD-K12540328	10 μM	6 h	-0.157917	0	0	A375
DOS053_A375_24H:BRD-K88180879-001-01-6:4.99	BRD-K88180879	5 μM	24 h	-0.157882	0	0	A375
CPC004_A375_6H:BRD-K20482099-001-01-1:10	rutin	10 μM	6 h	-0.157572	0	0	A375
CPC011_A375_6H:BRD-K94144010-001-12-1:10	cotinine	10 μM	6 h	-0.157564	0	0	A375
CPC006_A375_24H:BRD-K70792160-003-02-0:24	10-DEBC	20 μM	24 h	-0.15739	0	0	A375
CPC006_A375_24H:BRD-K26664453-001-03-4:10	cytochalasin-b	10 μM	24 h	-0.157325	0	0	A375
DOS056_A375_24H:BRD-K73329392-001-01-4:5	BRD-K73329392	5 μM	24 h	-0.157283	0	0	A375
DOS047_A375_24H:BRD-K33776933-001-01-1:5	BRD-K33776933	5 μM	24 h	-0.157204	0	0	A375
CPC007_A375_6H:BRD-K87657228-001-04-6:10	BRD-K87657228	10 μM	6 h	-0.157145	0	0	A375
CPC010_A375_6H:BRD-K53423944-001-06-1:10	BRD-K53423944	10 μM	6 h	-0.157133	0	0	A375
DOS049_A375_24H:BRD-K35654724-001-01-1:5	BRD-K35654724	5 μM	24 h	-0.157109	0	0	A375
CPC005_A375_24H:BRD-A08709697-001-02-9:10	heliotrine	10 μM	24 h	-0.156949	0	0	A375
CPC014_A375_6H:BRD-U08759356-000-01-6:10	EI-346-erlotinib-analog	10 μM	6 h	-0.156915	0	0	A375
DOS043_A375_24H:BRD-K78133682-001-01-4:5.1	BRD-K78133682	5 μM	24 h	-0.15691	0	0	A375
CPC007_A375_6H:BRD-K70503895-001-04-3:10	BRD-K70503895	10 μM	6 h	-0.156772	0	0	A375
CPC020_A375_6H:BRD-A25088322-001-01-2:10	CVF-SUMO-7	10 μM	6 h	-0.156566	0	0	A375
CPC018_A375_6H:BRD-K03440695-001-02-6:10	boldine	10 μM	6 h	-0.156482	0	0	A375
CPC014_A375_6H:BRD-K46062088-001-01-4:10	ST-4062971	10 μM	6 h	-0.156464	0	0	A375
CPC010_A375_6H:BRD-A27489425-001-10-7:10	rolitetracycline	10 μM	6 h	-0.156422	0	0	A375
CPC012_A375_6H:BRD-A63583287-001-01-8:10	SA-1447005	10 μM	6 h	-0.156413	0	0	A375
CPC010_A375_6H:BRD-K43736954-001-18-1:10	cortisone	10 μM	6 h	-0.15639	0	0	A375
DOS042_A375_24H:BRD-K29474997-001-01-2:4.99	BRD-K29474997	5 μM	24 h	-0.156216	0	0	A375
CPC007_A375_6H:BRD-K56446541-001-04-1:10	BRD-K56446541	10 μM	6 h	-0.156204	0	0	A375
CPC009_A375_6H:BRD-K37150847-001-10-1:10	BRD-K37150847	10 μM	6 h	-0.156042	0	0	A375
CPC004_A375_6H:BRD-K77947974-001-05-6:10	fluspirilene	10 μM	6 h	-0.155918	0	0	A375
DOS049_A375_24H:BRD-K99032206-001-01-0:5	BRD-K99032206	5 μM	24 h	-0.155894	0	0	A375
CPC018_A375_6H:BRD-K32598858-001-04-5:10	BRD-K32598858	10 μM	6 h	-0.155828	0	0	A375
DOS044_A375_24H:BRD-K37252182-001-01-7:5.03	BRD-K37252182	5 μM	24 h	-0.155758	0	0	A375
PCLB003_A375_24H:BRD-K10466330-001-01-5:0.37	AVA	0.37 μM	24 h	-0.155705	0	0	A375
CPC011_A375_6H:BRD-A24381660-001-15-2:10	zeranol	10 μM	6 h	-0.155674	0	0	A375
CPC011_A375_6H:BRD-A16444946-001-05-5:10	acarbose	10 μM	6 h	-0.155634	0	0	A375
CPC012_A375_6H:BRD-K70771662-001-01-3:10	BRD-K70771662	10 μM	6 h	-0.155624	0	0	A375
DOS048_A375_24H:BRD-K44787412-001-01-5:5.03	BRD-K44787412	5 μM	24 h	-0.155588	0	0	A375
DOS044_A375_24H:BRD-K48263651-001-01-3:5.04	BRD-K48263651	5 μM	24 h	-0.15554	0	0	A375
CPC012_A375_6H:BRD-A19248578-001-02-9:10	latrunculin-b	10 μM	6 h	-0.155349	0	0	A375
CPC018_A375_6H:BRD-K20655524-003-07-0:10	mefexamide	10 μM	6 h	-0.155338	0	0	A375
CPC006_A375_24H:BRD-K32330832-001-01-0:11.1	VER-155008	10 μM	24 h	-0.155283	0	0	A375
CPC009_A375_6H:BRD-K86217247-019-01-5:10	BRD-K86217247	10 μM	6 h	-0.155279	0	0	A375
CPC014_A375_6H:BRD-K18135438-001-08-4:10	chenodeoxycholic-acid	10 μM	6 h	-0.155273	0	0	A375
DOS048_A375_24H:BRD-K46965430-001-01-3:5.02	BRD-K46965430	5 μM	24 h	-0.155107	0	0	A375
CPC010_A375_6H:BRD-K89125793-001-21-1:10	tinidazole	10 μM	6 h	-0.15505	0	0	A375
DOSBIO002_A375_24H:BRD-K73876582:9.9748	BRD-K73876582	10 μM	24 h	-0.155016	0	0	A375
DOS046_A375_24H:BRD-K05502425-001-01-0:5	BRD-K05502425	5 μM	24 h	-0.154918	0	0	A375
DOS047_A375_24H:BRD-K80278608-001-01-4:5.03	BRD-K80278608	5 μM	24 h	-0.15489	0	0	A375
CPC012_A375_6H:BRD-K81441552-001-01-3:10	BRD-K81441552	10 μM	6 h	-0.154883	0	0	A375
CPC013_A375_6H:BRD-K05452595-001-01-2:10	BRD-K05452595	10 μM	6 h	-0.154717	0	0	A375
CPC009_A375_6H:BRD-K52321331-019-01-2:10	BRD-K52321331	10 μM	6 h	-0.15466	0	0	A375
CPC016_A375_6H:BRD-K83322645-103-01-6:10	L-693403	10 μM	6 h	-0.154573	0	0	A375
CPC012_A375_6H:BRD-K88710727-001-01-4:10	BRD-K88710727	10 μM	6 h	-0.154542	0	0	A375
CPC009_A375_6H:BRD-A39599596-019-01-3:10	BRD-A39599596	10 μM	6 h	-0.15454	0	0	A375
DOS048_A375_24H:BRD-K76436920-001-01-5:4.96	BRD-K76436920	5 μM	24 h	-0.154435	0	0	A375
CPC010_A375_6H:BRD-K51350053-048-10-8:10	toremifene	10 μM	6 h	-0.154399	0	0	A375
CPC014_A375_6H:BRD-K45114207-001-01-0:10	BRD-K45114207	10 μM	6 h	-0.154378	0	0	A375
DOS039_A375_24H:BRD-K31487013-001-01-0:5.05	BRD-K31487013	5 μM	24 h	-0.154352	0	0	A375
DOS040_A375_24H:BRD-K93240833-001-01-6:5.05	BRD-K93240833	5 μM	24 h	-0.154348	0	0	A375
CPC009_A375_6H:BRD-K55216615-001-05-7:10	BRD-K55216615	10 μM	6 h	-0.154253	0	0	A375
CPC006_A375_24H:BRD-K92241597-001-02-9:80	tosedostat	80 μM	24 h	-0.15414	0	0	A375
CPC010_A375_6H:BRD-A22897758-002-02-8:10	pinacidil	10 μM	6 h	-0.154018	0	0	A375
CPC005_A375_24H:BRD-K31342827-001-06-2:10	bisindolylmaleimide	10 μM	24 h	-0.153831	0	0	A375
CPC013_A375_6H:BRD-K48016779-001-01-2:10	BRD-K48016779	10 μM	6 h	-0.153755	0	0	A375
DOS048_A375_24H:BRD-K94243176-001-01-4:5	BRD-K94243176	5 μM	24 h	-0.153728	0	0	A375
CPC013_A375_6H:BRD-K06765193-001-05-3:10	BRD-K06765193	10 μM	6 h	-0.153694	0	0	A375
CPC005_A375_6H:BRD-K40782193-003-01-1:10	QX-222	10 μM	6 h	-0.153602	0	0	A375
PCLB001_A375_24H:BRD-K55896799-001-02-1:2.5	BRD-K55896799	3 μM	24 h	-0.15353	0	0	A375
DOS058_A375_24H:BRD-K91224798-019-01-7:5	BRD-K91224798	5 μM	24 h	-0.153467	0	0	A375
DOS043_A375_24H:BRD-K19167425-001-01-6:5.06	BRD-K19167425	5 μM	24 h	-0.153428	0	0	A375
DOS057_A375_24H:BRD-K81953058-001-01-6:5	BRD-K81953058	5 μM	24 h	-0.15324	0	0	A375
CPC006_A375_24H:BRD-K69932463-001-03-1:10	AZD-8055	10 μM	24 h	-0.153232	0	0	A375
DOS034_A375_24H:BRD-K32389477-001-01-6:4.85	BRD-K32389477	5 μM	24 h	-0.153133	0	0	A375
CPC010_A375_6H:BRD-K56745457-001-13-9:10	azauridine	10 μM	6 h	-0.152947	0	0	A375
DOS041_A375_24H:BRD-K86938339-001-01-3:5.07	BRD-K86938339	5 μM	24 h	-0.15292	0	0	A375
CPC006_A375_6H:BRD-K24132293-001-16-0:10	piperlongumine	10 μM	6 h	-0.152891	0	0	A375
CPC011_A375_6H:BRD-K25224017-001-21-9:10	pirenperone	10 μM	6 h	-0.152753	0	0	A375
PCLB001_A375_6H:BRD-A15100685-001-02-6:10	avicin-d	10 μM	6 h	-0.152657	0	0	A375
CPC011_A375_6H:BRD-K32311154-003-07-3:10	nifekalant	10 μM	6 h	-0.152616	0	0	A375
CPC017_A375_6H:BRD-K67298865-001-03-3:10	SB-431542	10 μM	6 h	-0.152551	0	0	A375
CPC014_A375_6H:BRD-K99291625-001-06-4:10	SB-203580	10 μM	6 h	-0.152515	0	0	A375
DOS049_A375_24H:BRD-K44525591-001-01-2:5	BRD-K44525591	5 μM	24 h	-0.1524	0	0	A375
CPC014_A375_6H:BRD-A03946276-001-01-3:10	BRD-A03946276	10 μM	6 h	-0.152326	0	0	A375
DOS055_A375_24H:BRD-K78088483-001-01-1:5	BRD-K78088483	5 μM	24 h	-0.152315	0	0	A375
CPC010_A375_6H:BRD-A36275421-001-18-6:10	BRD-A36275421	10 μM	6 h	-0.152224	0	0	A375
CPC011_A375_6H:BRD-K44353683-001-04-2:10	nateglinide	10 μM	6 h	-0.152211	0	0	A375
CPC010_A375_6H:BRD-K04136539-001-03-7:10	BRD-K04136539	10 μM	6 h	-0.152187	0	0	A375
CPC019_A375_6H:BRD-K04695623-001-01-3:10	BRD-K04695623	10 μM	6 h	-0.152077	0	0	A375
DOS054_A375_24H:BRD-K30098855-001-01-7:5	BRD-K30098855	5 μM	24 h	-0.151954	0	0	A375
CPC008_A375_6H:BRD-K05549170-001-01-8:10	BRD-K05549170	10 μM	6 h	-0.15193	0	0	A375
CPC017_A375_6H:BRD-K62206109-303-01-1:10	VUF-5681	10 μM	6 h	-0.151868	0	0	A375
CPC004_A375_6H:BRD-K02637541-001-06-5:10	celecoxib	10 μM	6 h	-0.151768	0	0	A375
CPC018_A375_6H:BRD-K17110974-001-04-7:10	aristolochic-acid	10 μM	6 h	-0.151761	0	0	A375
CPC008_A375_24H:BRD-A81377415-019-01-0:10	BRD-A81377415	10 μM	24 h	-0.15175	0	0	A375
CPC007_A375_6H:BRD-K22988559-001-07-5:10	BRD-K22988559	10 μM	6 h	-0.151465	0	0	A375
CPC009_A375_6H:BRD-K68756823-001-01-4:10	FR-180204	10 μM	6 h	-0.151347	0	0	A375
CPC018_A375_6H:BRD-K43887077-001-02-8:10	dopamine	10 μM	6 h	-0.151339	0	0	A375
DOS052_A375_24H:BRD-K20820984-001-01-0:4.99	BRD-K20820984	5 μM	24 h	-0.15122	0	0	A375
DOS033_A375_24H:BRD-K14078057-001-01-5:4.92	BRD-K14078057	5 μM	24 h	-0.151212	0	0	A375
CPC011_A375_6H:BRD-K00532621-003-06-9:10	midazolam	10 μM	6 h	-0.151206	0	0	A375
CPC012_A375_6H:BRD-K72238567-001-12-4:10	fludarabine	10 μM	6 h	-0.151157	0	0	A375
CPC011_A375_6H:BRD-K31920458-001-17-8:10	mestranol	10 μM	6 h	-0.151107	0	0	A375
CPC005_A375_24H:BRD-A15034104-002-03-6:10	bergenin	10 μM	24 h	-0.150607	0	0	A375
CPC014_A375_6H:BRD-U64289953-000-01-2:10	XMD-1185H	10 μM	6 h	-0.150552	0	0	A375
CPC019_A375_6H:BRD-K51556300-001-01-9:10	BRD-K51556300	10 μM	6 h	-0.150548	0	0	A375
CPC011_A375_6H:BRD-K17849083-001-23-8:10	tranilast	10 μM	6 h	-0.150431	0	0	A375
CPC010_A375_6H:BRD-A80386041-001-04-6:10	KUC103423N	10 μM	6 h	-0.150359	0	0	A375
DOS041_A375_24H:BRD-K61782241-001-01-1:5.1	BRD-K61782241	5 μM	24 h	-0.150347	0	0	A375
DOS056_A375_24H:BRD-K09551497-001-01-6:5	BRD-K09551497	5 μM	24 h	-0.150225	0	0	A375
CPC008_A375_6H:BRD-K83620635-001-02-9:10	BRD-K83620635	10 μM	6 h	-0.150138	0	0	A375
CPC011_A375_6H:BRD-A49172652-001-23-0:10	lansoprazole	10 μM	6 h	-0.150095	0	0	A375
CPC010_A375_6H:BRD-K28143534-003-20-0:10	cyproheptadine	10 μM	6 h	-0.150067	0	0	A375
DOS049_A375_24H:BRD-K63227090-001-01-7:5	BRD-K63227090	5 μM	24 h	-0.150047	0	0	A375
CPC008_A375_24H:BRD-K36533576-001-03-1:10	KU-C103875	10 μM	24 h	-0.150037	0	0	A375
CPC013_A375_6H:BRD-K66866270-001-01-1:10	BRD-K66866270	10 μM	6 h	-0.150021	0	0	A375
CPC006_A375_24H:BRD-K90999434-003-01-9:10	BRD-K90999434	10 μM	24 h	-0.149691	0	0	A375
CPC007_A375_24H:BRD-A99911370-001-04-1:10	BRD-A99911370	10 μM	24 h	-0.149656	0	0	A375
DOSBIO001_A375_24H:BRD-K60391168:10.1841	BRD-K60391168	10 μM	24 h	-0.149635	0	0	A375
DOS052_A375_24H:BRD-K22630074-001-01-2:4.95	BRD-K22630074	5 μM	24 h	-0.149545	0	0	A375
DOS039_A375_24H:BRD-K10279767-001-01-4:4.9	BRD-K10279767	5 μM	24 h	-0.149477	0	0	A375
DOS049_A375_24H:BRD-K10938308-004-01-5:5	BRD-K10938308	5 μM	24 h	-0.149411	0	0	A375
CPC019_A375_6H:BRD-A32595718-001-01-9:10	BJM-CSC-15	10 μM	6 h	-0.149299	0	0	A375
CPC017_A375_6H:BRD-K26573499-300-01-3:10	DMAB-anabaseine	10 μM	6 h	-0.149276	0	0	A375
DOS041_A375_24H:BRD-K74192638-001-01-9:5.01	BRD-K74192638	5 μM	24 h	-0.149219	0	0	A375
DOS039_A375_24H:BRD-K22825029-001-01-4:4.98	BRD-K22825029	5 μM	24 h	-0.149014	0	0	A375
CPC005_A375_24H:BRD-A08003242-001-02-7:10	rhodomyrtoxin-b	10 μM	24 h	-0.149005	0	0	A375
CPC013_A375_6H:BRD-K79254416-001-08-5:10	decitabine	10 μM	6 h	-0.148865	0	0	A375
CPC009_A375_6H:BRD-K11757396-004-01-1:10	BRD-K11757396	10 μM	6 h	-0.148854	0	0	A375
DOS048_A375_24H:BRD-K39447340-001-01-0:5.01	BRD-K39447340	5 μM	24 h	-0.148803	0	0	A375
DOS048_A375_24H:BRD-K16724492-001-01-5:4.97	BRD-K16724492	5 μM	24 h	-0.148705	0	0	A375
DOS055_A375_24H:BRD-K99827928-001-01-0:5	BRD-K99827928	5 μM	24 h	-0.148691	0	0	A375
CPC012_A375_6H:BRD-K61717269-001-01-4:10	BRD-K61717269	10 μM	6 h	-0.148666	0	0	A375
CPC014_A375_6H:BRD-K47943470-001-07-7:10	tyrphostin-51	10 μM	6 h	-0.148635	0	0	A375
CPC018_A375_6H:BRD-K61250553-003-16-5:10	loperamide	10 μM	6 h	-0.148572	0	0	A375
DOS046_A375_24H:BRD-K13234528-001-01-6:5	BRD-K13234528	5 μM	24 h	-0.148565	0	0	A375
CPC005_A375_6H:BRD-A19736161-003-03-0:10	ondansetron	10 μM	6 h	-0.148416	0	0	A375
CPC014_A375_6H:BRD-K00337317-001-01-7:10	NU-7441	10 μM	6 h	-0.148353	0	0	A375
PCLB002_A375_24H:BRD-K81839095:1.11	estrone	1.11 μM	24 h	-0.148335	0	0	A375
DOS044_A375_24H:BRD-K43326597-001-01-0:5.03	BRD-K43326597	5 μM	24 h	-0.148176	0	0	A375
CPC005_A375_6H:BRD-K55454768-001-01-8:10	TAS-301	10 μM	6 h	-0.148171	0	0	A375
CPC019_A375_6H:BRD-K32238524-001-01-8:10	BRD-K32238524	10 μM	6 h	-0.148159	0	0	A375
CPC010_A375_6H:BRD-A71262238-001-06-8:10	nafadotride	10 μM	6 h	-0.148122	0	0	A375
CPC007_A375_24H:BRD-K27484191-001-07-4:10	BRD-K27484191	10 μM	24 h	-0.1481	0	0	A375
CPC017_A375_6H:BRD-K11911061-003-02-8:10	GR-127935	10 μM	6 h	-0.14804	0	0	A375
CPC018_A375_6H:BRD-A97437073-001-03-1:10	rosiglitazone	10 μM	6 h	-0.147997	0	0	A375
CPC004_A375_6H:BRD-K67043667-001-15-7:10	altretamine	10 μM	6 h	-0.147925	0	0	A375
DOS047_A375_24H:BRD-K03669312-001-01-5:4.98	BRD-K03669312	5 μM	24 h	-0.14755	0	0	A375
CPC017_A375_6H:BRD-K00486786-001-01-4:10	Ro-08-2750	10 μM	6 h	-0.147539	0	0	A375
CPC017_A375_6H:BRD-K65814004-003-01-1:10	diphenyleneiodonium	10 μM	6 h	-0.147474	0	0	A375
CPC008_A375_24H:BRD-K44432556-001-03-0:10	VU-0418946-1	10 μM	24 h	-0.147294	0	0	A375
CPC009_A375_6H:BRD-K43267173-001-01-8:10	BRD-K43267173	10 μM	6 h	-0.147267	0	0	A375
DOSBIO001_A375_24H:BRD-K51350137:9.9775	SA-90377	10 μM	24 h	-0.147253	0	0	A375
CPC006_A375_6H:BRD-K19796430-001-01-5:10	sonidegib	10 μM	6 h	-0.14722	0	0	A375
CPC017_A375_6H:BRD-K26134695-001-02-8:10	calpeptin	10 μM	6 h	-0.147159	0	0	A375
CPC008_A375_6H:BRD-K49791723-001-01-6:10	BRD-K49791723	10 μM	6 h	-0.147158	0	0	A375
DOS057_A375_24H:BRD-K85236313-001-01-3:5	BRD-K85236313	5 μM	24 h	-0.147148	0	0	A375
CPC010_A375_6H:BRD-K12102668-001-20-6:10	nialamide	10 μM	6 h	-0.147021	0	0	A375
CPC009_A375_6H:BRD-A29721261-001-06-6:10	BRD-A29721261	10 μM	6 h	-0.147008	0	0	A375
PRISM001_A375_24H:BRD-K83963101-001-01-0:10	MLN-8054	10 μM	24 h	-0.146932	0	0	A375
CPC011_A375_6H:BRD-A23359898-001-06-2:10	sibutramine	10 μM	6 h	-0.146922	0	0	A375
DOS057_A375_24H:BRD-K87864638-001-01-8:5	SA-1925996	5 μM	24 h	-0.146879	0	0	A375
CPC009_A375_6H:BRD-K02735834-001-01-4:10	BRD-K02735834	10 μM	6 h	-0.146866	0	0	A375
DOS057_A375_24H:BRD-K75872636-001-01-7:5	BRD-K75872636	5 μM	24 h	-0.146833	0	0	A375
CPC008_A375_6H:BRD-K95858622-001-03-4:10	BRD-K95858622	10 μM	6 h	-0.146723	0	0	A375
DOS039_A375_24H:BRD-K78778476-001-01-6:5.05	BRD-K78778476	5 μM	24 h	-0.146638	0	0	A375
CPC011_A375_6H:BRD-A24191444-338-07-1:10	ifenprodil	10 μM	6 h	-0.146624	0	0	A375
CPC010_A375_6H:BRD-K86565213-001-04-9:10	BRD-K86565213	10 μM	6 h	-0.146558	0	0	A375
CPC018_A375_6H:BRD-K09602097-001-04-5:10	forskolin	10 μM	6 h	-0.146501	0	0	A375
DOS041_A375_24H:BRD-K41571462-001-01-5:4.99	BRD-K41571462	5 μM	24 h	-0.146355	0	0	A375
CPC012_A375_6H:BRD-A43155244-001-01-2:10	BRD-A43155244	10 μM	6 h	-0.14635	0	0	A375
CPC011_A375_6H:BRD-K57222227-002-02-8:10	indometacin	10 μM	6 h	-0.146341	0	0	A375
DOS034_A375_24H:BRD-K67484450-001-01-4:5.03	BRD-K67484450	5 μM	24 h	-0.146336	0	0	A375
DOS046_A375_24H:BRD-K58860003-001-01-8:5	SA-1921617	5 μM	24 h	-0.14629	0	0	A375
CPC012_A375_6H:BRD-K49372556-001-01-7:10	mofezolac	10 μM	6 h	-0.146244	0	0	A375
CPC004_A375_6H:BRD-K08287586-001-08-5:10	butyl-paraben	10 μM	6 h	-0.146207	0	0	A375
CPC008_A375_6H:BRD-K88317944-001-01-5:10	VU-0420364-1	10 μM	6 h	-0.146116	0	0	A375
CPC014_A375_6H:BRD-K38756014-001-03-6:10	farnesylcysteine-methyl-ester	10 μM	6 h	-0.146078	0	0	A375
DOS049_A375_24H:BRD-K60918127-001-01-1:5	BRD-K60918127	5 μM	24 h	-0.146007	0	0	A375
CPC010_A375_6H:BRD-K61217870-001-04-0:10	N-(3-acetamidophenyl)-3-chlorobenzamide	10 μM	6 h	-0.145972	0	0	A375
DOS053_A375_24H:BRD-K27049144-001-01-6:4.82	BRD-K27049144	5 μM	24 h	-0.145819	0	0	A375
DOS049_A375_24H:BRD-K65677539-004-01-4:5	BRD-K65677539	5 μM	24 h	-0.145785	0	0	A375
DOS044_A375_24H:BRD-K58941403-001-01-2:5.03	BRD-K58941403	5 μM	24 h	-0.145715	0	0	A375
DOS044_A375_24H:BRD-K29379469-001-01-2:5.02	BRD-K29379469	5 μM	24 h	-0.145602	0	0	A375
CPC010_A375_6H:BRD-K86595100-001-08-3:10	chlordiazepoxide	10 μM	6 h	-0.145527	0	0	A375
DOS047_A375_24H:BRD-K45356824-001-01-0:5.11	SA-1973497	5 μM	24 h	-0.145525	0	0	A375
DOS056_A375_24H:BRD-K86297549-001-01-0:5	BRD-K86297549	5 μM	24 h	-0.145514	0	0	A375
CPC012_A375_6H:BRD-K82837433-001-01-6:10	BRD-K82837433	10 μM	6 h	-0.145511	0	0	A375
CPC016_A375_6H:BRD-A70268693-103-01-9:10	PG-9	10 μM	6 h	-0.145385	0	0	A375
CPC006_A375_24H:BRD-K17561142-003-16-8:10	amiodarone	10 μM	24 h	-0.145363	0	0	A375
DOS053_A375_24H:BRD-K63731274-001-01-6:5.03	BRD-K63731274	5 μM	24 h	-0.145318	0	0	A375
CPC007_A375_6H:BRD-K45675241-004-06-1:10	BRD-K45675241	10 μM	6 h	-0.145265	0	0	A375
DOS049_A375_24H:BRD-K62774106-001-01-1:5	BRD-K62774106	5 μM	24 h	-0.145244	0	0	A375
DOS044_A375_24H:BRD-K61079130-001-03-2:5	BRD-K61079130	5 μM	24 h	-0.145207	0	0	A375
DOS039_A375_24H:BRD-K96039110-001-01-3:5.06	BRD-K96039110	5 μM	24 h	-0.145148	0	0	A375
CPC012_A375_6H:BRD-K73155123-001-01-9:10	BRD-K73155123	10 μM	6 h	-0.145114	0	0	A375
DOS041_A375_24H:BRD-K61428915-001-01-6:4.97	BRD-K61428915	5 μM	24 h	-0.145108	0	0	A375
CPC011_A375_6H:BRD-K93880783-001-20-9:10	stavudine	10 μM	6 h	-0.145053	0	0	A375
DOS041_A375_24H:BRD-K40591230-001-01-5:5.04	BRD-K40591230	5 μM	24 h	-0.145036	0	0	A375
CPC009_A375_6H:BRD-K23531129-001-03-2:10	KU-C104230	10 μM	6 h	-0.144976	0	0	A375
DOS042_A375_24H:BRD-K60548400-001-01-4:5.04	BRD-K60548400	5 μM	24 h	-0.144865	0	0	A375
DOS041_A375_24H:BRD-K77835518-001-01-5:4.97	BRD-K77835518	5 μM	24 h	-0.144816	0	0	A375
CPC005_A375_24H:BRD-K89732114-300-07-1:10	trifluoperazine	10 μM	24 h	-0.144808	0	0	A375
CPC006_A375_24H:BRD-K21672174-001-02-2:160	Ro-28-1675	100 μM	24 h	-0.144705	0	0	A375
DOSBIO002_A375_24H:BRD-K81210389:10.4409	BRD-K81210389	10 μM	24 h	-0.144667	0	0	A375
CPC020_A375_6H:BRD-K83932973-001-01-0:10	YL-62	10 μM	6 h	-0.144613	0	0	A375
DOS055_A375_24H:BRD-K95683812-001-01-0:5	BRD-K95683812	5 μM	24 h	-0.144603	0	0	A375
CPC008_A375_24H:BRD-K67619794-001-01-0:10	BRD-K67619794	10 μM	24 h	-0.144574	0	0	A375
DOS043_A375_24H:BRD-K08663380-001-01-0:5.3	BRD-K08663380	5 μM	24 h	-0.144561	0	0	A375
CPC005_A375_24H:BRD-K49049886-001-03-8:10	CGS-15943	10 μM	24 h	-0.144543	0	0	A375
CPC012_A375_6H:BRD-K15475572-001-01-8:10	BRD-K15475572	10 μM	6 h	-0.144534	0	0	A375
DOSBIO002_A375_24H:BRD-K40506152:10.0791	BRD-K40506152	10 μM	24 h	-0.144532	0	0	A375
CPC016_A375_6H:BRD-K45401373-001-04-3:10	betulinic-acid	10 μM	6 h	-0.144524	0	0	A375
CPC020_A375_6H:BRD-K03406345-001-11-2:10	azacitidine	10 μM	6 h	-0.14451	0	0	A375
CPC010_A375_6H:BRD-K15715913-001-05-6:10	fluperlapine	10 μM	6 h	-0.144481	0	0	A375
CPC006_A375_24H:BRD-K78513633-001-07-4:177.6	lonidamine	100 μM	24 h	-0.144467	0	0	A375
DOSBIO002_A375_24H:BRD-K39647256:10	BRD-K39647256	10 μM	24 h	-0.14446	0	0	A375
CPC018_A375_6H:BRD-A43940795-001-03-6:10	tetrahydropalmatine	10 μM	6 h	-0.14443	0	0	A375
DOS049_A375_24H:BRD-K89354425-001-01-5:5	BRD-K89354425	5 μM	24 h	-0.144339	0	0	A375
CPC010_A375_6H:BRD-K56855930-003-02-2:10	BRD-K56855930	10 μM	6 h	-0.144339	0	0	A375
CPC011_A375_6H:BRD-K71289571-001-08-0:10	zafirlukast	10 μM	6 h	-0.144219	0	0	A375
CPC005_A375_24H:BRD-A04026261-001-01-0:10	YO-2	10 μM	24 h	-0.144164	0	0	A375
CPC020_A375_6H:BRD-K04733502-001-01-8:10	BRD-K04733502	10 μM	6 h	-0.144111	0	0	A375
CPC008_A375_6H:BRD-K48654774-001-01-5:10	BRD-K48654774	10 μM	6 h	-0.144076	0	0	A375
CPC008_A375_24H:BRD-K88707333-001-04-0:10	BRD-K88707333	10 μM	24 h	-0.144056	0	0	A375
CPC017_A375_6H:BRD-K14618467-003-01-8:10	IKK-16	10 μM	6 h	-0.144012	0	0	A375
DOS053_A375_24H:BRD-K12678780-001-01-8:5.04	BRD-K12678780	5 μM	24 h	-0.143979	0	0	A375
CPC005_A375_24H:BRD-K59332007-300-01-9:10	linopirdine	10 μM	24 h	-0.143746	0	0	A375
CPC018_A375_6H:BRD-K32501161-300-04-7:10	vanoxerine	10 μM	6 h	-0.14374	0	0	A375
CPC013_A375_6H:BRD-K08799950-001-01-2:10	BRD-K08799950	10 μM	6 h	-0.143738	0	0	A375
CPC012_A375_6H:BRD-K37852224-001-01-4:10	BRD-K37852224	10 μM	6 h	-0.143623	0	0	A375
DOS053_A375_24H:BRD-K95762279-001-02-6:5.02	BRD-K95762279	5 μM	24 h	-0.143614	0	0	A375
CPC016_A375_6H:BRD-K88358234-003-01-4:10	xaliproden	10 μM	6 h	-0.143603	0	0	A375
CPC010_A375_6H:BRD-K26257340-001-06-7:10	BRD-K26257340	10 μM	6 h	-0.143521	0	0	A375
CPC014_A375_6H:BRD-K69852452-001-02-6:10	F-1566-0341	10 μM	6 h	-0.14342	0	0	A375
PCLB002_A375_24H:BRD-K63828191:3.33	raloxifene	3.33 μM	24 h	-0.143412	0	0	A375
CPC016_A375_6H:BRD-K96402602-001-01-8:10	farnesylthiotriazole	10 μM	6 h	-0.143293	0	0	A375
CPC012_A375_6H:BRD-K52831896-001-01-5:10	BRD-K52831896	10 μM	6 h	-0.143288	0	0	A375
DOS039_A375_24H:BRD-K09796735-001-01-9:4.9	BRD-K09796735	5 μM	24 h	-0.143282	0	0	A375
CPC010_A375_6H:BRD-K94296811-001-02-1:10	BRD-K94296811	10 μM	6 h	-0.14324	0	0	A375
CPC007_A375_6H:BRD-A44862234-001-02-2:10	BRD-A44862234	10 μM	6 h	-0.143232	0	0	A375
CPC006_A375_6H:BRD-K80672993-001-01-1:88.8	M2-PK-activator	90 μM	6 h	-0.143208	0	0	A375
DOS054_A375_24H:BRD-K79609340-001-01-6:5	BRD-K79609340	5 μM	24 h	-0.143043	0	0	A375
CPC007_A375_6H:BRD-K26767475-001-05-4:10	BRD-K26767475	10 μM	6 h	-0.143021	0	0	A375
CPC011_A375_6H:BRD-K88789588-001-10-7:10	letrozole	10 μM	6 h	-0.142935	0	0	A375
DOSBIO001_A375_24H:BRD-K00540336:10.1113	BRD-K00540336	10 μM	24 h	-0.142676	0	0	A375
CPC013_A375_6H:BRD-K42644990-003-01-6:10	BRD-K42644990	10 μM	6 h	-0.142634	0	0	A375
CPC009_A375_6H:BRD-A01320529-001-08-3:10	salmeterol	10 μM	6 h	-0.14257	0	0	A375
CPC008_A375_6H:BRD-A89104433-019-01-8:10	VU-0415556-1	10 μM	6 h	-0.142546	0	0	A375
DOS052_A375_24H:BRD-K39066612-001-01-9:5.04	BRD-K39066612	5 μM	24 h	-0.142535	0	0	A375
CPC007_A375_6H:BRD-K73004613-001-04-0:10	BRD-K73004613	10 μM	6 h	-0.142341	0	0	A375
CPC014_A375_6H:BRD-K09186807-001-01-6:10	KIN001-244	10 μM	6 h	-0.142327	0	0	A375
CPC017_A375_6H:BRD-K60230970-001-04-3:10	MG-132	10 μM	6 h	-0.14232	0	0	A375
CPC006_A375_6H:BRD-A62182663-001-01-4:10	YK-4279	10 μM	6 h	-0.142268	0	0	A375
DOS053_A375_24H:BRD-K38052671-001-01-8:5	BRD-K38052671	5 μM	24 h	-0.142253	0	0	A375
DOS041_A375_24H:BRD-K13529284-001-01-3:5.04	BRD-K13529284	5 μM	24 h	-0.142134	0	0	A375
DOS043_A375_24H:BRD-K73575094-001-01-3:5.02	BRD-K73575094	5 μM	24 h	-0.14205	0	0	A375
CPC004_A375_6H:BRD-A75552914-001-09-3:10	isoxicam	10 μM	6 h	-0.141924	0	0	A375
CPC006_A375_24H:BRD-K60219430-001-01-6:10	serdemetan	10 μM	24 h	-0.141872	0	0	A375
DOS043_A375_24H:BRD-K34160774-001-01-9:5.05	BRD-K34160774	5 μM	24 h	-0.141841	0	0	A375
CPC009_A375_6H:BRD-K52800308-001-03-8:10	KU-C103658	10 μM	6 h	-0.141721	0	0	A375
CPC004_A375_6H:BRD-K28936863-051-18-1:10	ketotifen	10 μM	6 h	-0.141711	0	0	A375
CPC013_A375_6H:BRD-K15672523-001-01-0:10	BRD-K15672523	10 μM	6 h	-0.141698	0	0	A375
DOS048_A375_24H:BRD-K04630954-001-01-9:5.06	BRD-K04630954	5 μM	24 h	-0.141662	0	0	A375
CPC011_A375_6H:BRD-K27305388-005-14-1:10	BRD-K27305388	10 μM	6 h	-0.141569	0	0	A375
DOSBIO001_A375_24H:BRD-K29251608:10.0387	BRD-K29251608	10 μM	24 h	-0.141536	0	0	A375
DOS056_A375_24H:BRD-K66340791-001-01-7:5	BRD-K66340791	5 μM	24 h	-0.141501	0	0	A375
CPC010_A375_6H:BRD-K63488275-001-05-3:10	CS-2092524	10 μM	6 h	-0.141415	0	0	A375
CPC006_A375_24H:BRD-K12184916-001-03-0:0.63	NVP-BEZ235	500 nM	24 h	-0.14137	0	0	A375
DOS040_A375_24H:BRD-K36618611-001-01-1:4.6	BRD-K36618611	5 μM	24 h	-0.141364	0	0	A375
CPC017_A375_6H:BRD-K14200658-001-02-6:10	syrosingopine	10 μM	6 h	-0.141256	0	0	A375
CPC009_A375_6H:BRD-K26304855-001-01-5:10	BRD-K26304855	10 μM	6 h	-0.141251	0	0	A375
CPC014_A375_6H:BRD-K94294671-003-01-3:10	OSI-027	10 μM	6 h	-0.141199	0	0	A375
CPC010_A375_6H:BRD-K41713976-003-04-2:10	E-4031	10 μM	6 h	-0.14103	0	0	A375
DOS033_A375_24H:BRD-K08922114-001-01-3:4.83	BRD-K08922114	5 μM	24 h	-0.140868	0	0	A375
CPC010_A375_6H:BRD-K76534306-001-17-7:10	enrofloxacin	10 μM	6 h	-0.140856	0	0	A375
DOS042_A375_24H:BRD-K61741250-001-01-5:5.04	BRD-K61741250	5 μM	24 h	-0.140817	0	0	A375
CPC006_A375_6H:BRD-A68631409-001-01-3:10	evodiamine	10 μM	6 h	-0.140691	0	0	A375
CPC016_A375_6H:BRD-K30867024-003-01-7:10	SB-216641	10 μM	6 h	-0.140532	0	0	A375
CPC004_A375_6H:BRD-A62184259-001-02-8:10	cycloheximide	10 μM	6 h	-0.140458	0	0	A375
CPC007_A375_24H:BRD-A43126523-001-06-4:10	BRD-A43126523	10 μM	24 h	-0.140432	0	0	A375
CPC009_A375_6H:BRD-K72817452-001-01-6:10	BRD-K72817452	10 μM	6 h	-0.140375	0	0	A375
CPC018_A375_6H:BRD-K78280988-001-02-2:10	anandamide	10 μM	6 h	-0.140375	0	0	A375
DOSBIO002_A375_24H:BRD-K61753121:10.0904	BRD-K61753121	10 μM	24 h	-0.140369	0	0	A375
CPC013_A375_6H:BRD-A57107094-001-01-7:10	BRD-A57107094	10 μM	6 h	-0.140363	0	0	A375
CPC007_A375_6H:BRD-K10355322-001-06-9:10	BRD-K10355322	10 μM	6 h	-0.14025	0	0	A375
DOSBIO002_A375_24H:BRD-K63158888:9.97077	BRD-K63158888	10 μM	24 h	-0.140228	0	0	A375
CPC005_A375_6H:BRD-A99571536-001-04-4:10	dubinidine	10 μM	6 h	-0.140179	0	0	A375
CPC018_A375_6H:BRD-A99449986-001-01-4:10	MT-21	10 μM	6 h	-0.140079	0	0	A375
DOS053_A375_24H:BRD-K49909254-001-01-1:4.93	BRD-K49909254	5 μM	24 h	-0.140019	0	0	A375
DOS048_A375_24H:BRD-K74428993-001-01-6:5.04	BRD-K74428993	5 μM	24 h	-0.140004	0	0	A375
DOS040_A375_24H:BRD-K90338784-001-01-0:5.01	BRD-K90338784	5 μM	24 h	-0.139974	0	0	A375
CPC020_A375_6H:BRD-K07530279-001-04-0:10	BRD-K07530279	10 μM	6 h	-0.139834	0	0	A375
CPC009_A375_6H:BRD-K58982513-001-01-3:10	BRD-K58982513	10 μM	6 h	-0.139831	0	0	A375
CPC017_A375_6H:BRD-K89210380-001-03-8:10	biotin	10 μM	6 h	-0.139806	0	0	A375
CPC005_A375_24H:BRD-K40624912-003-02-3:10	ZM-39923	10 μM	24 h	-0.139743	0	0	A375
DOSBIO002_A375_24H:BRD-K23872111:10.1133	BRD-K23872111	10 μM	24 h	-0.139682	0	0	A375
CPC005_A375_24H:BRD-A52660433-066-01-3:10	tetrindole	10 μM	24 h	-0.139606	0	0	A375
CPC004_A375_6H:BRD-A97701745-001-09-5:10	pindolol	10 μM	6 h	-0.139566	0	0	A375
CPC006_A375_6H:BRD-K15318909-001-04-8:44.4	PRIMA1	40 μM	6 h	-0.139548	0	0	A375
DOS039_A375_24H:BRD-K71287386-001-01-4:5.11	BRD-K71287386	5 μM	24 h	-0.139439	0	0	A375
CPC006_A375_24H:BRD-K47983010-001-02-1:10	BX-795	10 μM	24 h	-0.139424	0	0	A375
DOS039_A375_24H:BRD-K39629581-001-01-1:4.94	BRD-K39629581	5 μM	24 h	-0.139404	0	0	A375
CPC014_A375_6H:BRD-K28178212-003-01-5:10	GW-441756	10 μM	6 h	-0.1393	0	0	A375
CPC009_A375_6H:BRD-K75477256-001-01-4:10	BRD-K75477256	10 μM	6 h	-0.139172	0	0	A375
CPC013_A375_6H:BRD-K53327986-001-01-4:10	BRD-K53327986	10 μM	6 h	-0.139149	0	0	A375
DOS039_A375_24H:BRD-K65752719-001-01-3:5.1	BRD-K65752719	5 μM	24 h	-0.138939	0	0	A375
DOS054_A375_24H:BRD-K10225413-001-01-5:5	BRD-K10225413	5 μM	24 h	-0.138906	0	0	A375
CPC012_A375_6H:BRD-K03736784-001-01-1:10	MD-II-038	10 μM	6 h	-0.138878	0	0	A375
DOS054_A375_24H:BRD-K38385119-001-01-2:5	BRD-K38385119	5 μM	24 h	-0.138866	0	0	A375
CPC014_A375_6H:BRD-A26595446-001-08-1:10	BRD-A26595446	10 μM	6 h	-0.13884	0	0	A375
DOS048_A375_24H:BRD-K70653194-001-01-0:5.03	BRD-K70653194	5 μM	24 h	-0.138757	0	0	A375
CPC004_A375_6H:BRD-K82036761-003-07-0:10	sertraline	10 μM	6 h	-0.138685	0	0	A375
CPC007_A375_24H:BRD-K34452916-001-06-8:10	FU-JMBII127B	10 μM	24 h	-0.138643	0	0	A375
DOS049_A375_24H:BRD-K96103104-001-01-5:5	BRD-K96103104	5 μM	24 h	-0.138613	0	0	A375
DOS033_A375_24H:BRD-K31042955-001-01-3:5.02	BRD-K31042955	5 μM	24 h	-0.138602	0	0	A375
CPC009_A375_6H:BRD-A81233518-004-14-6:10	glycopyrrolate	10 μM	6 h	-0.138596	0	0	A375
CPC011_A375_6H:BRD-K52080565-001-07-6:10	nandrolone	10 μM	6 h	-0.138577	0	0	A375
CPC020_A375_6H:BRD-K46211610-003-22-6:10	tolazoline	10 μM	6 h	-0.138547	0	0	A375
CPC007_A375_6H:BRD-K07790824-001-03-2:10	BRD-K07790824	10 μM	6 h	-0.138542	0	0	A375
DOS054_A375_24H:BRD-K89148860-001-01-3:5	BRD-K89148860	5 μM	24 h	-0.138516	0	0	A375
DOS052_A375_24H:BRD-K55345900-001-02-5:5.01	BRD-K55345900	5 μM	24 h	-0.138427	0	0	A375
CPC005_A375_24H:BRD-K63430059-001-09-9:10	methoxsalen	10 μM	24 h	-0.138183	0	0	A375
DOS040_A375_24H:BRD-K74964997-001-01-6:5.03	BRD-K74964997	5 μM	24 h	-0.138136	0	0	A375
CPC005_A375_24H:BRD-A75769826-003-01-3:10	SDM-25N	10 μM	24 h	-0.138105	0	0	A375
CPC012_A375_6H:BRD-K10010115-001-01-2:10	BRD-K10010115	10 μM	6 h	-0.138102	0	0	A375
DOS039_A375_24H:BRD-K20255967-001-01-0:5.02	BRD-K20255967	5 μM	24 h	-0.138097	0	0	A375
CPC008_A375_6H:BRD-K92158425-001-01-5:10	BRD-K92158425	10 μM	6 h	-0.137993	0	0	A375
DOS057_A375_24H:BRD-K44937047-001-01-9:5	BRD-K44937047	5 μM	24 h	-0.137899	0	0	A375
CPC016_A375_6H:BRD-K97158071-001-08-2:10	droperidol	10 μM	6 h	-0.137879	0	0	A375
DOS049_A375_24H:BRD-K92333822-004-01-7:5	BRD-K92333822	5 μM	24 h	-0.137868	0	0	A375
CPC008_A375_6H:BRD-K88668773-001-05-8:10	BRD-K88668773	10 μM	6 h	-0.137854	0	0	A375
CPC008_A375_6H:BRD-K44366801-001-04-1:10	BRD-K44366801	10 μM	6 h	-0.137845	0	0	A375
CPC020_A375_6H:BRD-K72732164-001-01-6:10	BRD-K72732164	10 μM	6 h	-0.137838	0	0	A375
CPC006_A375_24H:BRD-K54256913-001-01-2:10	MK-1775	10 μM	24 h	-0.137836	0	0	A375
PRISM001_A375_6H:BRD-K52047316-001-01-0:5	BRD-K52047316	5 μM	6 h	-0.1377	0	0	A375
DOS041_A375_24H:BRD-K79145303-001-01-6:5.01	BRD-K79145303	5 μM	24 h	-0.137596	0	0	A375
CPC004_A375_6H:BRD-A92177080-001-01-3:10	betamethasone-acetate	10 μM	6 h	-0.137425	0	0	A375
DOS044_A375_24H:BRD-K62714735-001-01-6:5.01	BRD-K62714735	5 μM	24 h	-0.13736	0	0	A375
DOS054_A375_24H:BRD-K24009388-001-01-8:5	BRD-K24009388	5 μM	24 h	-0.137355	0	0	A375
CPC004_A375_6H:BRD-K99595596-004-03-4:10	salsolinol	10 μM	6 h	-0.13732	0	0	A375
CPC005_A375_6H:BRD-A47513740-001-02-5:10	calyculin	10 μM	6 h	-0.137293	0	0	A375
CPC009_A375_6H:BRD-K10114046-001-01-6:10	BRD-K10114046	10 μM	6 h	-0.137289	0	0	A375
CPC010_A375_6H:BRD-K80184735-001-02-8:10	KUC104240N	10 μM	6 h	-0.137243	0	0	A375
CPC009_A375_6H:BRD-A83706824-019-01-3:10	BRD-A83706824	10 μM	6 h	-0.137195	0	0	A375
CPC005_A375_24H:BRD-A30435184-001-01-5:10	metergoline	10 μM	24 h	-0.137099	0	0	A375
CPC010_A375_6H:BRD-A86990971-001-04-3:10	KUC103424N	10 μM	6 h	-0.137041	0	0	A375
DOS053_A375_24H:BRD-K06731779-001-01-6:5.03	BRD-K06731779	5 μM	24 h	-0.137032	0	0	A375
DOS056_A375_24H:BRD-K98328967-001-01-2:5	BRD-K98328967	5 μM	24 h	-0.136968	0	0	A375
CPC009_A375_6H:BRD-K94381355-001-04-9:10	BRD-K94381355	10 μM	6 h	-0.136963	0	0	A375
CPC020_A375_6H:BRD-A50774520-001-01-5:10	CVF-SUMO-11	10 μM	6 h	-0.136937	0	0	A375
CPC011_A375_6H:BRD-A33168282-003-13-1:10	sotalol	10 μM	6 h	-0.136895	0	0	A375
DOS040_A375_24H:BRD-K89609393-001-01-0:5.02	BRD-K89609393	5 μM	24 h	-0.136795	0	0	A375
CPC006_A375_6H:BRD-A58280226-001-01-2:4	Y-27632	3 μM	6 h	-0.136759	0	0	A375
DOS041_A375_24H:BRD-K64682090-001-01-2:5.04	BRD-K64682090	5 μM	24 h	-0.136752	0	0	A375
CPC009_A375_6H:BRD-K14270862-001-01-3:10	BRD-K14270862	10 μM	6 h	-0.13673	0	0	A375
CPC010_A375_6H:BRD-K32696739-001-16-6:10	noreleagnine	10 μM	6 h	-0.136681	0	0	A375
CPC008_A375_6H:BRD-K28362289-001-06-6:10	BRD-K28362289	10 μM	6 h	-0.136655	0	0	A375
CPC008_A375_24H:BRD-K30434763-019-01-7:10	BRD-K30434763	10 μM	24 h	-0.136652	0	0	A375
DOS058_A375_24H:BRD-K97176469-019-01-1:5	BRD-K97176469	5 μM	24 h	-0.136633	0	0	A375
CPC013_A375_6H:BRD-K54573313-001-01-6:10	BRD-K54573313	10 μM	6 h	-0.136605	0	0	A375
CPC005_A375_24H:BRD-K13211965-003-01-0:10	L-741742	10 μM	24 h	-0.136556	0	0	A375
DOS041_A375_24H:BRD-K39241486-001-01-1:5.02	BRD-K39241486	5 μM	24 h	-0.136489	0	0	A375
CPC005_A375_6H:BRD-A31159102-003-13-0:10	fluoxetine	10 μM	6 h	-0.136488	0	0	A375
CPC020_A375_6H:BRD-A09722536-002-13-1:10	cyclophosphamide	10 μM	6 h	-0.136442	0	0	A375
CPC010_A375_6H:BRD-K30097969-001-04-6:10	pitavastatin	10 μM	6 h	-0.136401	0	0	A375
DOS049_A375_24H:BRD-K26586614-001-01-9:5	BRD-K26586614	5 μM	24 h	-0.136331	0	0	A375
CPC005_A375_24H:BRD-A44701612-066-01-9:10	dihydroergocristine	10 μM	24 h	-0.136271	0	0	A375
CPC012_A375_6H:BRD-K15419449-001-01-7:10	I-303059	10 μM	6 h	-0.136263	0	0	A375
CPC016_A375_6H:BRD-K56047318-001-03-0:10	RHC-80267	10 μM	6 h	-0.136253	0	0	A375
CPC009_A375_6H:BRD-K96147838-001-01-5:10	BRD-K96147838	10 μM	6 h	-0.136242	0	0	A375
DOSBIO002_A375_24H:BRD-K13559922:10.0387	BRD-K13559922	10 μM	24 h	-0.136191	0	0	A375
CPC014_A375_6H:BRD-K37720887-001-01-1:10	SB-525334	10 μM	6 h	-0.13618	0	0	A375
CPC007_A375_6H:BRD-K87964538-001-07-4:10	BRD-K87964538	10 μM	6 h	-0.136132	0	0	A375
CPC019_A375_6H:BRD-K88278225-001-01-9:10	BRD-K88278225	10 μM	6 h	-0.136124	0	0	A375
PCLB003_A375_24H:BRD-K81528515-001-01-3:10	nilotinib	10 μM	24 h	-0.136068	0	0	A375
CPC011_A375_6H:BRD-A12560204-001-14-1:10	nitrendipine	10 μM	6 h	-0.136067	0	0	A375
PCLB002_A375_24H:BRD-K45330754:10	diethylstilbestrol	10 μM	24 h	-0.13605	0	0	A375
CPC011_A375_6H:BRD-A42423104-011-04-7:10	benproperine	10 μM	6 h	-0.135965	0	0	A375
DOSBIO002_A375_24H:BRD-A13084692:3.33333	troglitazone	3 μM	24 h	-0.135935	0	0	A375
CPC014_A375_6H:BRD-M16762496-001-01-9:10	PIK-75	10 μM	6 h	-0.135907	0	0	A375
CPC020_A375_6H:BRD-K76357752-001-03-2:10	BRD-K76357752	10 μM	6 h	-0.135903	0	0	A375
CPC004_A375_6H:BRD-K70301876-034-06-1:10	escitalopram	10 μM	6 h	-0.135897	0	0	A375
DOS034_A375_24H:BRD-K55699053-001-01-2:5.04	BRD-K55699053	5 μM	24 h	-0.135808	0	0	A375
CPC010_A375_6H:BRD-K39462424-050-07-2:10	dexchlorpheniramine	10 μM	6 h	-0.135732	0	0	A375
CPC016_A375_6H:BRD-A22783572-065-01-3:10	vinblastine	10 μM	6 h	-0.135588	0	0	A375
DOS054_A375_24H:BRD-K59085546-001-01-5:5	BRD-K59085546	5 μM	24 h	-0.135581	0	0	A375
CPC004_A375_6H:BRD-A16694057-001-03-5:10	BADGE	10 μM	6 h	-0.135525	0	0	A375
CPC011_A375_6H:BRD-A87387433-001-02-7:10	cefpodoxime	10 μM	6 h	-0.135431	0	0	A375
CPC005_A375_6H:BRD-K91336023-001-01-4:10	mesulergine	10 μM	6 h	-0.135384	0	0	A375
CPC006_A375_24H:BRD-K73261812-001-01-1:10	BRD-K73261812	10 μM	24 h	-0.135358	0	0	A375
CPC007_A375_6H:BRD-A71657825-001-05-0:10	2-(biphenyl-4-ylsulfonamido)pentanedioic-acid	10 μM	6 h	-0.135213	0	0	A375
CPC008_A375_24H:BRD-K68833544-001-01-9:10	BRD-K68833544	10 μM	24 h	-0.135178	0	0	A375
DOS044_A375_24H:BRD-K58087285-001-01-7:5.03	BRD-K58087285	5 μM	24 h	-0.135151	0	0	A375
CPC015_A375_6H:BRD-A58564983-001-03-8:10	selamectin	10 μM	6 h	-0.135149	0	0	A375
CPC009_A375_6H:BRD-K83670234-001-01-1:10	BRD-K83670234	10 μM	6 h	-0.13499	0	0	A375
CPC008_A375_24H:BRD-K36665199-001-01-2:10	BRD-K36665199	10 μM	24 h	-0.134927	0	0	A375
CPC016_A375_6H:BRD-K03670461-001-02-0:10	tyrphostin-AG-82	10 μM	6 h	-0.134916	0	0	A375
CPC020_A375_6H:BRD-K91863345-001-06-7:10	MW-STK33-1B	10 μM	6 h	-0.134838	0	0	A375
CPC007_A375_6H:BRD-K06748700-001-05-5:10	BRD-K06748700	10 μM	6 h	-0.134832	0	0	A375
CPC010_A375_6H:BRD-K85853281-001-03-9:10	BRD-K85853281	10 μM	6 h	-0.134821	0	0	A375
DOS042_A375_24H:BRD-K03935278-001-01-2:5.03	BRD-K03935278	5 μM	24 h	-0.134807	0	0	A375
CPC004_A375_6H:BRD-K46937689-001-08-5:10	phenazone	10 μM	6 h	-0.134805	0	0	A375
DOS040_A375_24H:BRD-K46707636-001-01-1:5	BRD-K46707636	5 μM	24 h	-0.134633	0	0	A375
CPC008_A375_6H:BRD-K97516968-001-01-2:10	VU-0418000-1	10 μM	6 h	-0.134545	0	0	A375
CPC008_A375_6H:BRD-K77681376-001-01-4:10	BRD-K77681376	10 μM	6 h	-0.134426	0	0	A375
CPC005_A375_24H:BRD-K53959060-001-01-3:10	indirubin	10 μM	24 h	-0.134334	0	0	A375
CPC017_A375_6H:BRD-K11373525-003-01-3:10	ZD-7155	10 μM	6 h	-0.134283	0	0	A375
CPC014_A375_6H:BRD-A01317026-001-01-2:10	7,8-dihydro-L-biopterin	10 μM	6 h	-0.134184	0	0	A375
DOS048_A375_24H:BRD-K41354272-001-01-6:5.03	BRD-K41354272	5 μM	24 h	-0.134179	0	0	A375
DOS054_A375_24H:BRD-K43624963-001-01-4:5	BRD-K43624963	5 μM	24 h	-0.134138	0	0	A375
PCLB002_A375_24H:BRD-K00627859:3.33	tubastatin-a	3.33 μM	24 h	-0.13409	0	0	A375
DOS055_A375_24H:BRD-K53092731-001-01-2:5	BRD-K53092731	5 μM	24 h	-0.13408	0	0	A375
CPC014_A375_6H:BRD-K75081836-001-01-3:10	BRD-K75081836	10 μM	6 h	-0.133988	0	0	A375
DOS057_A375_24H:BRD-K22264435-001-01-4:5	BRD-K22264435	5 μM	24 h	-0.133947	0	0	A375
DOS049_A375_24H:BRD-K74327009-001-01-2:5	BRD-K74327009	5 μM	24 h	-0.133929	0	0	A375
DOS049_A375_24H:BRD-K18260949-001-01-7:5	BRD-K18260949	5 μM	24 h	-0.133909	0	0	A375
CPC006_A375_24H:BRD-K67844266-001-01-3:11.1	pevonedistat	10 μM	24 h	-0.133886	0	0	A375
CPC009_A375_6H:BRD-A20846977-001-01-6:10	VU-0447126-2	10 μM	6 h	-0.133748	0	0	A375
CPC005_A375_24H:BRD-K79092138-001-06-0:10	nitrofural	10 μM	24 h	-0.13368	0	0	A375
DOS052_A375_24H:BRD-K40518011-001-01-3:4.96	BRD-K40518011	5 μM	24 h	-0.133602	0	0	A375
CPC018_A375_6H:BRD-A80928489-001-01-0:10	1-monopalmitin	10 μM	6 h	-0.133573	0	0	A375
DOS055_A375_24H:BRD-K35939150-001-01-9:5	BRD-K35939150	5 μM	24 h	-0.133502	0	0	A375
CPC012_A375_6H:BRD-K84855052-001-01-6:10	BRD-K84855052	10 μM	6 h	-0.133439	0	0	A375
CPC012_A375_6H:BRD-K19146323-001-01-3:10	STK-661558	10 μM	6 h	-0.13339	0	0	A375
DOSBIO001_A375_24H:BRD-K92232855:10.1419	BRD-K92232855	10 μM	24 h	-0.13337	0	0	A375
CPC019_A375_6H:BRD-K98824517-001-06-4:10	BRD-K98824517	10 μM	6 h	-0.133313	0	0	A375
DOS040_A375_24H:BRD-K72347310-001-01-6:5.05	BRD-K72347310	5 μM	24 h	-0.133312	0	0	A375
CPC020_A375_6H:BRD-A51182606-001-07-4:10	chloramphenicol	10 μM	6 h	-0.133306	0	0	A375
DOS033_A375_24H:BRD-K73388067-001-01-4:4.98	BRD-K73388067	5 μM	24 h	-0.133257	0	0	A375
CPC007_A375_6H:BRD-K98219271-001-07-1:10	BRD-K98219271	10 μM	6 h	-0.133229	0	0	A375
CPC017_A375_6H:BRD-A00267231-001-01-1:10	hemado	10 μM	6 h	-0.133223	0	0	A375
DOS039_A375_24H:BRD-K02653582-001-01-3:4.97	BRD-K02653582	5 μM	24 h	-0.133194	0	0	A375
DOS042_A375_24H:BRD-K06228572-001-01-2:5.07	BRD-K06228572	5 μM	24 h	-0.133154	0	0	A375
CPC014_A375_6H:BRD-K71035033-001-01-4:10	masitinib	10 μM	6 h	-0.133123	0	0	A375
CPC010_A375_6H:BRD-A62647958-001-08-5:10	BRD-A62647958	10 μM	6 h	-0.133119	0	0	A375
DOS048_A375_24H:BRD-K89692527-001-01-5:5.04	BRD-K89692527	5 μM	24 h	-0.133033	0	0	A375
CPC015_A375_6H:BRD-K57033106-048-03-6:10	tripelennamine	10 μM	6 h	-0.133014	0	0	A375
CPC008_A375_6H:BRD-K58999277-019-01-5:10	BRD-K58999277	10 μM	6 h	-0.133007	0	0	A375
CPC018_A375_6H:BRD-K75478907-001-01-5:10	GS-39783	10 μM	6 h	-0.132993	0	0	A375
CPC007_A375_6H:BRD-A72069525-001-05-0:10	BRD-A72069525	10 μM	6 h	-0.132969	0	0	A375
CPC012_A375_6H:BRD-K86693415-001-03-7:10	BRD-K86693415	10 μM	6 h	-0.132961	0	0	A375
DOS052_A375_24H:BRD-K18511213-001-02-0:5	BRD-K18511213	5 μM	24 h	-0.132928	0	0	A375
CPC009_A375_6H:BRD-K35240538-001-19-7:10	methylprednisolone	10 μM	6 h	-0.132825	0	0	A375
CPC017_A375_6H:BRD-K68246049-001-01-4:10	TTNPB	10 μM	6 h	-0.132784	0	0	A375
CPC008_A375_24H:BRD-K40329609-019-01-5:10	BRD-K40329609	10 μM	24 h	-0.132784	0	0	A375
BRAF001_A375_24H:BRD-K63675182-003-18-6:10	triflupromazine	10 μM	24 h	-0.132718	0	0	A375
DOS048_A375_24H:BRD-K38232832-001-01-2:5.02	BRD-K38232832	5 μM	24 h	-0.132667	0	0	A375
CPC005_A375_24H:BRD-K04210847-001-01-1:10	tamoxifen	10 μM	24 h	-0.132625	0	0	A375
CPC019_A375_6H:BRD-K23582869-001-01-3:10	BRD-K23582869	10 μM	6 h	-0.132612	0	0	A375
CPC016_A375_6H:BRD-K78294846-001-02-5:10	osthol	10 μM	6 h	-0.13256	0	0	A375
CPC005_A375_6H:BRD-A65767837-001-03-6:10	hydrocortisone-acetate	10 μM	6 h	-0.13253	0	0	A375
CPC017_A375_6H:BRD-A49906757-004-03-1:10	scopolamine-n-oxide	10 μM	6 h	-0.132421	0	0	A375
CPC007_A375_24H:BRD-K11717138-001-20-4:10	benzbromarone	10 μM	24 h	-0.13241	0	0	A375
CPC008_A375_6H:BRD-K53780220-001-01-0:10	BRD-K53780220	10 μM	6 h	-0.132393	0	0	A375
CPC020_A375_6H:BRD-K79390395-001-07-4:10	BRD-K79390395	10 μM	6 h	-0.132305	0	0	A375
CPC016_A375_6H:BRD-A95096829-300-01-4:10	PNU-96415E	10 μM	6 h	-0.132216	0	0	A375
DOS049_A375_24H:BRD-K28107603-001-01-5:5	BRD-K28107603	5 μM	24 h	-0.132175	0	0	A375
CPC012_A375_6H:BRD-A39093044-001-05-4:10	K784-3187	10 μM	6 h	-0.132108	0	0	A375
PCLB003_A375_24H:BRD-K17016787-001-10-0:0.04	estriol	0.04 μM	24 h	-0.132071	0	0	A375
CPC019_A375_6H:BRD-K96076993-001-01-7:10	SA-25547	10 μM	6 h	-0.131991	0	0	A375
CPC007_A375_6H:BRD-K68102868-001-05-8:10	BRD-K68102868	10 μM	6 h	-0.13185	0	0	A375
CPC007_A375_24H:BRD-K33305493-001-02-9:10	BRD-K33305493	10 μM	24 h	-0.131811	0	0	A375
CPC011_A375_6H:BRD-K49668410-001-13-9:10	clarithromycin	10 μM	6 h	-0.131801	0	0	A375
CPC004_A375_6H:BRD-K00603606-003-13-3:10	ticlopidine	10 μM	6 h	-0.131787	0	0	A375
DOS058_A375_24H:BRD-K34404444-001-01-1:5	BRD-K34404444	5 μM	24 h	-0.131629	0	0	A375
CPC004_A375_6H:BRD-A55416093-001-03-1:10	colforsin	10 μM	6 h	-0.131623	0	0	A375
CPC010_A375_6H:BRD-K41410256-001-03-2:10	balsalazide	10 μM	6 h	-0.131618	0	0	A375
CPC018_A375_6H:BRD-K06234293-001-01-8:10	LY-364947	10 μM	6 h	-0.131589	0	0	A375
CPC009_A375_6H:BRD-K87371039-003-01-5:10	BRD-K87371039	10 μM	6 h	-0.131579	0	0	A375
CPC016_A375_6H:BRD-K37691127-001-02-2:10	hinokitiol	10 μM	6 h	-0.131491	0	0	A375
CPC019_A375_6H:BRD-K67414432-001-01-4:10	BRD-K67414432	10 μM	6 h	-0.131352	0	0	A375
DOS033_A375_24H:BRD-K11169037-001-01-0:5.03	BRD-K11169037	5 μM	24 h	-0.131351	0	0	A375
CPC013_A375_6H:BRD-K43256821-001-01-7:10	BRD-K43256821	10 μM	6 h	-0.131348	0	0	A375
CPC013_A375_6H:BRD-K35638681-001-01-5:10	BRD-K35638681	10 μM	6 h	-0.131305	0	0	A375
CPC018_A375_6H:BRD-K39965020-001-03-4:10	doconexent	10 μM	6 h	-0.131287	0	0	A375
DOSBIO001_A375_24H:BRD-K67514995:10.0099	BRD-K67514995	10 μM	24 h	-0.1312	0	0	A375
CPC009_A375_6H:BRD-K67742177-001-01-7:10	BRD-K67742177	10 μM	6 h	-0.13118	0	0	A375
DOS034_A375_24H:BRD-K37631226-001-01-0:5.01	BRD-K37631226	5 μM	24 h	-0.131138	0	0	A375
DOS055_A375_24H:BRD-K31558029-001-01-0:5	BRD-K31558029	5 μM	24 h	-0.131089	0	0	A375
CPC007_A375_24H:BRD-K71746704-001-05-5:10	BRD-K71746704	10 μM	24 h	-0.131057	0	0	A375
CPC011_A375_6H:BRD-K14765469-003-10-6:10	vesamicol	10 μM	6 h	-0.131001	0	0	A375
CPC007_A375_6H:BRD-K97926541-001-06-8:10	BRD-K97926541	10 μM	6 h	-0.130952	0	0	A375
PCLB001_A375_6H:BRD-K92084213-001-01-9:0.63	MW-SHH-61	500 nM	6 h	-0.130936	0	0	A375
DOS055_A375_24H:BRD-K13307254-001-01-0:5	BRD-K13307254	5 μM	24 h	-0.130785	0	0	A375
DOS041_A375_24H:BRD-K75111717-001-01-2:5.08	BRD-K75111717	5 μM	24 h	-0.130779	0	0	A375
DOS047_A375_24H:BRD-K79564569-001-01-7:4.99	SA-1457305	5 μM	24 h	-0.130771	0	0	A375
CPC008_A375_24H:BRD-A21406558-001-01-5:10	BRD-A21406558	10 μM	24 h	-0.130692	0	0	A375
DOS049_A375_24H:BRD-K83491689-001-01-2:5	BRD-K83491689	5 μM	24 h	-0.13065	0	0	A375
CPC006_A375_24H:BRD-K64642496-001-01-6:40	KO-143	40 μM	24 h	-0.130642	0	0	A375
DOS058_A375_24H:BRD-K65044501-019-01-9:5	BRD-K65044501	5 μM	24 h	-0.130633	0	0	A375
DOSBIO001_A375_24H:BRD-K70875408:10.1708	BRD-K70875408	10 μM	24 h	-0.130621	0	0	A375
PCLB003_A375_24H:BRD-K59019422-001-01-3:1.11	BRD-K59019422	1.11 μM	24 h	-0.130567	0	0	A375
CPC018_A375_6H:BRD-K17674993-001-03-1:10	diflorasone	10 μM	6 h	-0.130471	0	0	A375
DOS033_A375_24H:BRD-K90256762-001-01-0:5.03	BRD-K90256762	5 μM	24 h	-0.130433	0	0	A375
DOS054_A375_24H:BRD-K48165980-001-01-2:5	BRD-K48165980	5 μM	24 h	-0.130297	0	0	A375
CPC017_A375_6H:BRD-K59574735-001-05-0:10	ubenimex	10 μM	6 h	-0.130216	0	0	A375
DOS048_A375_24H:BRD-K90305015-001-01-0:5.01	BRD-K90305015	5 μM	24 h	-0.130199	0	0	A375
DOS042_A375_24H:BRD-K44341698-001-01-6:5.02	BRD-K44341698	5 μM	24 h	-0.130094	0	0	A375
DOS039_A375_24H:BRD-K81799166-001-01-2:3.98	BRD-K81799166	3 μM	24 h	-0.130084	0	0	A375
DOS040_A375_24H:BRD-K13428252-001-01-6:5.03	BRD-K13428252	5 μM	24 h	-0.129959	0	0	A375
DOS057_A375_24H:BRD-K10937407-001-01-3:5	BRD-K10937407	5 μM	24 h	-0.12988	0	0	A375
CPC007_A375_6H:BRD-A25829966-001-02-8:10	BRD-A25829966	10 μM	6 h	-0.129864	0	0	A375
CPC010_A375_6H:BRD-K92317137-001-08-1:10	BRD-K92317137	10 μM	6 h	-0.129858	0	0	A375
DOS052_A375_24H:BRD-K55362990-001-01-3:4.98	BRD-K55362990	5 μM	24 h	-0.129835	0	0	A375
CPC006_A375_24H:BRD-K81473043-001-04-7:0.35	tanespimycin	500 nM	24 h	-0.129782	0	0	A375
CPC004_A375_6H:BRD-K72726508-001-01-3:10	arcyriaflavin-a	10 μM	6 h	-0.129781	0	0	A375
DOS048_A375_24H:BRD-K76358141-001-01-4:5	BRD-K76358141	5 μM	24 h	-0.129759	0	0	A375
DOS049_A375_24H:BRD-K99626290-001-01-6:5	BRD-K99626290	5 μM	24 h	-0.129676	0	0	A375
CPC012_A375_6H:BRD-K55715339-001-01-2:10	BRD-K55715339	10 μM	6 h	-0.12964	0	0	A375
CPC011_A375_6H:BRD-A50684349-066-08-3:10	fenoldopam	10 μM	6 h	-0.12964	0	0	A375
DOS054_A375_24H:BRD-K95607309-001-01-9:5	BRD-K95607309	5 μM	24 h	-0.129562	0	0	A375
CPC007_A375_24H:BRD-K27440500-001-05-6:10	BRD-K27440500	10 μM	24 h	-0.129552	0	0	A375
CPC006_A375_24H:BRD-K52075040-001-03-0:44.4	cerulenin	40 μM	24 h	-0.129545	0	0	A375
CPC014_A375_6H:BRD-K85985071-001-20-7:10	ellipticine	10 μM	6 h	-0.129505	0	0	A375
DOS044_A375_24H:BRD-K36716113-001-01-6:5	BRD-K36716113	5 μM	24 h	-0.129459	0	0	A375
DOSBIO002_A375_24H:BRD-K23564937:10.1488	BRD-K23564937	10 μM	24 h	-0.129429	0	0	A375
CPC012_A375_6H:BRD-A51777634-001-01-0:10	VU-0418933-1	10 μM	6 h	-0.129391	0	0	A375
DOS048_A375_24H:BRD-K02058097-001-01-3:5.01	BRD-K02058097	5 μM	24 h	-0.12936	0	0	A375
CPC005_A375_6H:BRD-A73859745-236-01-8:10	glycodeoxycholic-acid	10 μM	6 h	-0.12932	0	0	A375
CPC005_A375_24H:BRD-A26787626-001-02-9:10	cyclopiazonic-acid	10 μM	24 h	-0.129224	0	0	A375
DOS054_A375_24H:BRD-K93538891-001-01-2:5	BRD-K93538891	5 μM	24 h	-0.129166	0	0	A375
PCLB003_A375_24H:BRD-K61691971-001-01-0:1.11	avrainvillamide-analog-1	1.11 μM	24 h	-0.129086	0	0	A375
CPC016_A375_6H:BRD-K82865713-001-02-6:10	prostaglandin-b2	10 μM	6 h	-0.129031	0	0	A375
DOS033_A375_24H:BRD-K66361302-001-01-5:4.99	SA-424827	5 μM	24 h	-0.12902	0	0	A375
DOS058_A375_24H:BRD-K52536034-019-01-5:5	BRD-K52536034	5 μM	24 h	-0.128978	0	0	A375
CPC007_A375_6H:BRD-K48199208-001-05-8:10	BRD-K48199208	10 μM	6 h	-0.128969	0	0	A375
CPC017_A375_6H:BRD-K86882815-001-01-6:10	cabergoline	10 μM	6 h	-0.128899	0	0	A375
DOS046_A375_24H:BRD-K74381836-001-01-8:5	SA-1921456	5 μM	24 h	-0.128877	0	0	A375
CPC016_A375_6H:BRD-K88677950-001-01-3:10	PD-198306	10 μM	6 h	-0.128783	0	0	A375
CPC008_A375_6H:BRD-K14355517-001-01-1:10	BRD-K14355517	10 μM	6 h	-0.128714	0	0	A375
DOS043_A375_24H:BRD-K95919017-001-01-1:5	BRD-K95919017	5 μM	24 h	-0.12871	0	0	A375
CPC014_A375_6H:BRD-A18497530-001-05-3:10	5-iodotubercidin	10 μM	6 h	-0.12865	0	0	A375
CPC016_A375_6H:BRD-K91699951-001-03-7:10	benzonatate	10 μM	6 h	-0.128489	0	0	A375
DOS040_A375_24H:BRD-K41423295-001-01-2:5.09	BRD-K41423295	5 μM	24 h	-0.128463	0	0	A375
DOS043_A375_24H:BRD-K36313546-001-01-9:5	BRD-K36313546	5 μM	24 h	-0.128454	0	0	A375
CPC009_A375_6H:BRD-K24281017-001-03-8:10	KU-C103656	10 μM	6 h	-0.128437	0	0	A375
CPC012_A375_6H:BRD-K69501658-001-01-3:10	BRD-K69501658	10 μM	6 h	-0.128417	0	0	A375
BRAF001_A375_24H:BRD-K92049597-001-14-1:10	triamterene	10 μM	24 h	-0.128402	0	0	A375
DOS040_A375_24H:BRD-K26840329-001-01-6:4.95	BRD-K26840329	5 μM	24 h	-0.128291	0	0	A375
DOS049_A375_24H:BRD-K11911738-001-01-7:5	BRD-K11911738	5 μM	24 h	-0.128287	0	0	A375
DOS049_A375_24H:BRD-K21159035-001-01-1:5	BRD-K21159035	5 μM	24 h	-0.128173	0	0	A375
DOS046_A375_24H:BRD-K55767450-001-01-6:5	BRD-K55767450	5 μM	24 h	-0.128165	0	0	A375
DOSBIO002_A375_24H:BRD-K55155550:10.089	BRD-K55155550	10 μM	24 h	-0.128122	0	0	A375
DOS040_A375_24H:BRD-K68664718-001-01-8:4.98	BRD-K68664718	5 μM	24 h	-0.128044	0	0	A375
CPC017_A375_6H:BRD-K74284736-001-01-5:10	L-689560	10 μM	6 h	-0.127936	0	0	A375
CPC006_A375_24H:BRD-K28360340-001-01-8:10	TW-37	10 μM	24 h	-0.127922	0	0	A375
DOS043_A375_24H:BRD-K95367721-001-01-0:5.03	BRD-K95367721	5 μM	24 h	-0.127908	0	0	A375
CPC013_A375_6H:BRD-A20488704-001-01-7:10	BRD-A20488704	10 μM	6 h	-0.127899	0	0	A375
PCLB003_A375_24H:BRD-K43797669-001-22-1:10	genistein	10 μM	24 h	-0.127888	0	0	A375
CPC017_A375_6H:BRD-A95939040-008-03-3:10	sertaconazole	10 μM	6 h	-0.127798	0	0	A375
CPC015_A375_6H:BRD-K59753853-001-01-5:10	MDL-29951	10 μM	6 h	-0.127731	0	0	A375
CPC010_A375_6H:BRD-K82034465-001-03-7:10	BRD-K82034465	10 μM	6 h	-0.127711	0	0	A375
CPC008_A375_6H:BRD-K64822626-001-03-3:10	KU-C104135	10 μM	6 h	-0.127691	0	0	A375
CPC012_A375_6H:BRD-K41220170-236-01-4:10	BRD-K41220170	10 μM	6 h	-0.127657	0	0	A375
DOS033_A375_24H:BRD-K93971021-001-01-8:5	BRD-K93971021	5 μM	24 h	-0.127656	0	0	A375
CPC013_A375_6H:BRD-K24681473-004-01-4:10	YM-155	10 μM	6 h	-0.127648	0	0	A375
DOS034_A375_24H:BRD-K62019457-001-02-4:5	BRD-K62019457	5 μM	24 h	-0.127616	0	0	A375
DOS056_A375_24H:BRD-K32253397-001-01-1:5	BRD-K32253397	5 μM	24 h	-0.127614	0	0	A375
CPC017_A375_6H:BRD-A58269583-001-02-0:10	deoxyandirobin	10 μM	6 h	-0.12757	0	0	A375
DOS057_A375_24H:BRD-K31928320-001-01-1:5	BRD-K31928320	5 μM	24 h	-0.127546	0	0	A375
CPC010_A375_6H:BRD-A66435872-050-04-0:10	HTMT	10 μM	6 h	-0.127486	0	0	A375
CPC009_A375_6H:BRD-K85853911-001-01-1:10	KUC104542N	10 μM	6 h	-0.127485	0	0	A375
CPC009_A375_6H:BRD-K06555716-019-01-7:10	BRD-K06555716	10 μM	6 h	-0.127389	0	0	A375
DOS043_A375_24H:BRD-K93112400-001-01-0:5.01	BRD-K93112400	5 μM	24 h	-0.127379	0	0	A375
DOS041_A375_24H:BRD-K92810472-001-01-3:5.01	BRD-K92810472	5 μM	24 h	-0.127336	0	0	A375
CPC010_A375_6H:BRD-K17915279-001-05-8:10	JAS07-004	10 μM	6 h	-0.127265	0	0	A375
CPC005_A375_6H:BRD-K67511046-003-03-7:10	naloxone	10 μM	6 h	-0.127073	0	0	A375
CPC012_A375_6H:BRD-A80788753-001-01-7:10	EMF-sumo1-10	10 μM	6 h	-0.127058	0	0	A375
DOS053_A375_24H:BRD-K09059658-001-01-5:5	BRD-K09059658	5 μM	24 h	-0.127056	0	0	A375
DOS053_A375_24H:BRD-K48457318-001-02-4:4.91	BRD-K48457318	5 μM	24 h	-0.126987	0	0	A375
CPC009_A375_6H:BRD-K35133769-001-01-2:10	BRD-K35133769	10 μM	6 h	-0.126817	0	0	A375
CPC014_A375_6H:BRD-K77908580-001-05-4:10	entinostat	10 μM	6 h	-0.12676	0	0	A375
DOS034_A375_24H:BRD-K08221563-001-01-6:5.12	BRD-K08221563	5 μM	24 h	-0.126672	0	0	A375
CPC006_A375_6H:BRD-K08417745-001-02-9:88.8	SID-26681509	90 μM	6 h	-0.126623	0	0	A375
CPC007_A375_24H:BRD-K40087974-001-10-5:10	BRD-K40087974	10 μM	24 h	-0.126573	0	0	A375
CPC019_A375_6H:BRD-K67870070-001-01-4:10	SA-247615	10 μM	6 h	-0.126553	0	0	A375
CPC012_A375_6H:BRD-K42308740-001-01-5:10	ST-056792	10 μM	6 h	-0.126539	0	0	A375
CPC008_A375_6H:BRD-K50985433-001-04-5:10	BRD-K50985433	10 μM	6 h	-0.126518	0	0	A375
CPC006_A375_6H:BRD-K04623885-001-03-4:80	BIBR-1532	80 μM	6 h	-0.126393	0	0	A375
CPC004_A375_6H:BRD-K40887525-001-14-4:10	ritanserin	10 μM	6 h	-0.126297	0	0	A375
CPC007_A375_6H:BRD-K49814456-001-09-2:10	BRD-K49814456	10 μM	6 h	-0.126291	0	0	A375
CPC008_A375_24H:BRD-K44978960-019-01-8:10	BRD-K44978960	10 μM	24 h	-0.126288	0	0	A375
CPC008_A375_24H:BRD-K40378749-001-01-1:10	BRD-K40378749	10 μM	24 h	-0.12625	0	0	A375
DOS052_A375_24H:BRD-K92924609-001-01-8:5.09	BRD-K92924609	5 μM	24 h	-0.126216	0	0	A375
CPC007_A375_24H:BRD-K95352812-019-02-2:10	BRD-K95352812	10 μM	24 h	-0.126204	0	0	A375
CPC010_A375_6H:BRD-K56024573-001-04-7:10	BRD-K56024573	10 μM	6 h	-0.126184	0	0	A375
CPC006_A375_24H:BRD-K28907958-001-02-7:11.1	CD-437	10 μM	24 h	-0.126151	0	0	A375
CPC009_A375_6H:BRD-A67981824-236-01-2:10	cefotaxime	10 μM	6 h	-0.126131	0	0	A375
DOSBIO001_A375_24H:BRD-K17139610:10.0402	BRD-K17139610	10 μM	24 h	-0.126068	0	0	A375
CPC017_A375_6H:BRD-K74141488-003-03-9:10	naftifine	10 μM	6 h	-0.126046	0	0	A375
CPC005_A375_6H:BRD-K48059230-003-01-1:10	YM-298198	10 μM	6 h	-0.126011	0	0	A375
CPC008_A375_24H:BRD-K07259155-001-05-2:10	BRD-K07259155	10 μM	24 h	-0.125984	0	0	A375
CPC014_A375_6H:BRD-K19499941-001-05-9:10	BRD-K19499941	10 μM	6 h	-0.12588	0	0	A375
CPC009_A375_6H:BRD-K61981833-001-03-9:10	KU-C104227	10 μM	6 h	-0.125872	0	0	A375
CPC006_A375_24H:BRD-A41451487-001-06-2:160	PK-11195	100 μM	24 h	-0.125812	0	0	A375
CPC010_A375_6H:BRD-K95547711-001-04-3:10	BRD-K95547711	10 μM	6 h	-0.125808	0	0	A375
DOS044_A375_24H:BRD-K28997108-001-01-9:5.03	BRD-K28997108	5 μM	24 h	-0.125785	0	0	A375
CPC013_A375_6H:BRD-A77704559-001-01-5:10	BRD-A77704559	10 μM	6 h	-0.125767	0	0	A375
CPC011_A375_6H:BRD-A34817987-001-24-1:10	itraconazole	10 μM	6 h	-0.125716	0	0	A375
DOS055_A375_24H:BRD-K42957595-001-01-5:5	BRD-K42957595	5 μM	24 h	-0.125686	0	0	A375
DOS039_A375_24H:BRD-K15973523-001-01-2:5.18	BRD-K15973523	5 μM	24 h	-0.125622	0	0	A375
CPC010_A375_6H:BRD-K93034159-001-20-9:10	cladribine	10 μM	6 h	-0.1256	0	0	A375
DOS043_A375_24H:BRD-K58999044-001-03-1:5.03	BRD-K58999044	5 μM	24 h	-0.125569	0	0	A375
CPC004_A375_6H:BRD-K77925998-050-06-9:10	quipazine	10 μM	6 h	-0.125551	0	0	A375
CPC014_A375_6H:BRD-K31841256-001-01-4:10	BRD-K31841256	10 μM	6 h	-0.125508	0	0	A375
CPC013_A375_6H:BRD-K96704748-001-01-2:10	BRD-K96704748	10 μM	6 h	-0.125485	0	0	A375
CPC010_A375_6H:BRD-A72180425-001-10-6:10	K784-3188	10 μM	6 h	-0.125419	0	0	A375
DOS042_A375_24H:BRD-K52184420-001-01-4:5.03	BRD-K52184420	5 μM	24 h	-0.125175	0	0	A375
DOSBIO001_A375_24H:BRD-K47512679:10.0463	BRD-K47512679	10 μM	24 h	-0.125167	0	0	A375
CPC010_A375_6H:BRD-K65742362-001-06-3:10	BRD-K65742362	10 μM	6 h	-0.125132	0	0	A375
CPC014_A375_6H:BRD-K01493881-001-20-3:10	apigenin	10 μM	6 h	-0.124954	0	0	A375
CPC018_A375_6H:BRD-A50311610-300-06-2:10	meclizine	10 μM	6 h	-0.124895	0	0	A375
CPC007_A375_6H:BRD-K89237706-001-08-7:10	noscapine	10 μM	6 h	-0.124892	0	0	A375
DOS042_A375_24H:BRD-K96634415-001-01-3:5.06	BRD-K96634415	5 μM	24 h	-0.124869	0	0	A375
DOS055_A375_24H:BRD-K29094514-001-01-2:5	BRD-K29094514	5 μM	24 h	-0.124868	0	0	A375
CPC017_A375_6H:BRD-A68281735-001-02-0:10	REV-5901	10 μM	6 h	-0.124808	0	0	A375
CPC008_A375_6H:BRD-K79554012-001-01-1:10	BRD-K79554012	10 μM	6 h	-0.12479	0	0	A375
CPC013_A375_6H:BRD-U82589721-000-01-4:10	HG-5-113-01	10 μM	6 h	-0.124789	0	0	A375
CPC007_A375_6H:BRD-K60571253-001-05-5:10	BRD-K60571253	10 μM	6 h	-0.124744	0	0	A375
CPC006_A375_6H:BRD-A04706586-236-01-7:10	bucladesine	10 μM	6 h	-0.124607	0	0	A375
CPC004_A375_6H:BRD-A27554692-001-01-3:10	altrenogest	10 μM	6 h	-0.124601	0	0	A375
CPC014_A375_6H:BRD-A60245366-001-01-1:10	AS-601245	10 μM	6 h	-0.124573	0	0	A375
DOS042_A375_24H:BRD-K71346068-001-01-3:4.99	BRD-K71346068	5 μM	24 h	-0.124534	0	0	A375
DOSBIO001_A375_24H:BRD-K70345064:10.0331	BRD-K70345064	10 μM	24 h	-0.124513	0	0	A375
CPC005_A375_24H:BRD-A18419789-001-01-4:10	etoposide	10 μM	24 h	-0.124506	0	0	A375
DOSBIO001_A375_24H:BRD-K79657514:10.2249	BRD-K79657514	10 μM	24 h	-0.1245	0	0	A375
DOS054_A375_24H:BRD-K01751906-001-01-5:5	BRD-K01751906	5 μM	24 h	-0.124484	0	0	A375
DOSBIO002_A375_24H:BRD-K66658536:9.95069	BRD-K66658536	10 μM	24 h	-0.124457	0	0	A375
CPC006_A375_24H:BRD-K67075780-001-03-7:160	TGX-115	100 μM	24 h	-0.124441	0	0	A375
CPC008_A375_24H:BRD-K09138889-001-03-4:10	KU-C104131	10 μM	24 h	-0.124371	0	0	A375
CPC007_A375_24H:BRD-K51745483-001-04-1:10	BRD-K51745483	10 μM	24 h	-0.124359	0	0	A375
DOS043_A375_24H:BRD-K18246949-001-01-6:5.14	BRD-K18246949	5 μM	24 h	-0.124358	0	0	A375
DOS042_A375_24H:BRD-K18001731-001-01-7:5.03	BRD-K18001731	5 μM	24 h	-0.124247	0	0	A375
DOS043_A375_24H:BRD-K76439996-001-01-8:5.4	BRD-K76439996	5 μM	24 h	-0.124235	0	0	A375
CPC007_A375_24H:BRD-K36087356-001-04-2:10	BRD-K36087356	10 μM	24 h	-0.124231	0	0	A375
CPC009_A375_6H:BRD-K18861610-001-04-4:10	BRD-K18861610	10 μM	6 h	-0.124224	0	0	A375
CPC019_A375_6H:BRD-K82196068-001-01-9:10	BRD-K82196068	10 μM	6 h	-0.124201	0	0	A375
DOS040_A375_24H:BRD-K38498572-001-01-3:5.05	BRD-K38498572	5 μM	24 h	-0.124196	0	0	A375
DOS046_A375_24H:BRD-K90463980-001-01-8:5	BRD-K90463980	5 μM	24 h	-0.124155	0	0	A375
CPC009_A375_6H:BRD-K20401833-001-01-2:10	BRD-K20401833	10 μM	6 h	-0.124148	0	0	A375
DOS054_A375_24H:BRD-K06833365-001-01-0:5	BRD-K06833365	5 μM	24 h	-0.124132	0	0	A375
CPC006_A375_6H:BRD-K18190982-002-01-2:44.4	COT-10b	40 μM	6 h	-0.124097	0	0	A375
CPC012_A375_6H:BRD-A20697603-001-05-6:10	thiostrepton	10 μM	6 h	-0.123971	0	0	A375
CPC008_A375_24H:BRD-K89209981-001-01-7:10	BRD-K89209981	10 μM	24 h	-0.123926	0	0	A375
CPC007_A375_6H:BRD-K03371390-001-06-2:10	BRD-K03371390	10 μM	6 h	-0.123909	0	0	A375
CPC012_A375_6H:BRD-K66426634-001-01-5:10	BRD-K66426634	10 μM	6 h	-0.12386	0	0	A375
DOS039_A375_24H:BRD-K93459801-001-01-0:5.13	BRD-K93459801	5 μM	24 h	-0.123852	0	0	A375
CPC009_A375_6H:BRD-K30570479-001-01-1:10	VU-0400195-3	10 μM	6 h	-0.12385	0	0	A375
CPC018_A375_6H:BRD-A40431293-001-01-0:10	BRD-A40431293	10 μM	6 h	-0.123781	0	0	A375
CPC007_A375_6H:BRD-K92458042-001-05-3:10	BRD-K92458042	10 μM	6 h	-0.123773	0	0	A375
CPC008_A375_24H:BRD-K69097969-001-03-2:10	VU-0418939-2	10 μM	24 h	-0.123755	0	0	A375
DOS044_A375_24H:BRD-K74299234-001-01-0:5.01	BRD-K74299234	5 μM	24 h	-0.123755	0	0	A375
CPC008_A375_6H:BRD-K92817986-001-03-3:10	BIX-02188	10 μM	6 h	-0.123724	0	0	A375
DOS055_A375_24H:BRD-K19147748-001-01-8:5	BRD-K19147748	5 μM	24 h	-0.123678	0	0	A375
CPC012_A375_6H:BRD-K42568865-001-01-3:10	BRD-K42568865	10 μM	6 h	-0.123663	0	0	A375
PCLB001_A375_6H:BRD-K25444257-001-02-2:0.63	MW-SHH-54	500 nM	6 h	-0.123635	0	0	A375
CPC005_A375_6H:BRD-A92161634-001-02-6:10	scopoline	10 μM	6 h	-0.123613	0	0	A375
CPC008_A375_24H:BRD-K40175949-001-04-3:10	BRD-K40175949	10 μM	24 h	-0.123563	0	0	A375
CPC017_A375_6H:BRD-K21667562-001-01-4:10	AM-404	10 μM	6 h	-0.123542	0	0	A375
DOS054_A375_24H:BRD-K26766547-001-01-9:5	BRD-K26766547	5 μM	24 h	-0.123538	0	0	A375
CPC009_A375_6H:BRD-K68020183-001-01-9:10	BRD-K68020183	10 μM	6 h	-0.123536	0	0	A375
CPC007_A375_24H:BRD-K40224283-001-06-8:10	BRD-K40224283	10 μM	24 h	-0.12352	0	0	A375
DOS053_A375_24H:BRD-K39622686-001-01-0:5.04	BRD-K39622686	5 μM	24 h	-0.12351	0	0	A375
DOS043_A375_24H:BRD-K70469022-001-01-9:5.04	BRD-K70469022	5 μM	24 h	-0.123466	0	0	A375
DOS033_A375_24H:BRD-K92455082-001-01-9:5.06	BRD-K92455082	5 μM	24 h	-0.123451	0	0	A375
CPC006_A375_6H:BRD-K32405725-001-01-0:88.8	etomoxir	90 μM	6 h	-0.123433	0	0	A375
DOS043_A375_24H:BRD-K49480198-001-01-2:5	BRD-K49480198	5 μM	24 h	-0.12341	0	0	A375
CPC011_A375_6H:BRD-A05186015-001-04-4:10	bupropion	10 μM	6 h	-0.123409	0	0	A375
DOS040_A375_24H:BRD-K35470597-001-01-6:5.01	BRD-K35470597	5 μM	24 h	-0.123335	0	0	A375
CPC012_A375_6H:BRD-K24031526-001-01-5:10	BRD-K24031526	10 μM	6 h	-0.123281	0	0	A375
CPC004_A375_6H:BRD-K06712146-001-01-2:10	YM-90709	10 μM	6 h	-0.123246	0	0	A375
CPC011_A375_6H:BRD-K89348303-001-09-7:10	ramipril	10 μM	6 h	-0.123215	0	0	A375
DOS044_A375_24H:BRD-K60024977-001-01-9:5.03	BRD-K60024977	5 μM	24 h	-0.123215	0	0	A375
DOS056_A375_24H:BRD-K02372107-001-01-6:5	BRD-K02372107	5 μM	24 h	-0.123186	0	0	A375
CPC009_A375_6H:BRD-K67778494-001-09-0:10	BRD-K67778494	10 μM	6 h	-0.12318	0	0	A375
DOS057_A375_24H:BRD-K15697250-001-01-6:5	BRD-K15697250	5 μM	24 h	-0.123168	0	0	A375
DOS039_A375_24H:BRD-K43556160-001-01-9:4.93	BRD-K43556160	5 μM	24 h	-0.123114	0	0	A375
DOS048_A375_24H:BRD-K02217114-001-01-4:5.01	BRD-K02217114	5 μM	24 h	-0.12309	0	0	A375
CPC014_A375_6H:BRD-K94018295-001-06-5:10	EMF-sumo1-3	10 μM	6 h	-0.122982	0	0	A375
DOS046_A375_24H:BRD-K72814870-001-01-7:5	BRD-K72814870	5 μM	24 h	-0.122946	0	0	A375
CPC016_A375_6H:BRD-A76093993-001-01-8:10	cromakalim	10 μM	6 h	-0.122934	0	0	A375
DOS041_A375_24H:BRD-K24213763-001-01-1:5.45	BRD-K24213763	5 μM	24 h	-0.122812	0	0	A375
CPC016_A375_6H:BRD-K94512704-001-02-1:10	spiramide	10 μM	6 h	-0.122811	0	0	A375
CPC012_A375_6H:BRD-K94572506-001-01-7:10	BRD-K94572506	10 μM	6 h	-0.122737	0	0	A375
CPC010_A375_6H:BRD-K99582188-001-04-0:10	BRD-K99582188	10 μM	6 h	-0.122729	0	0	A375
CPC008_A375_6H:BRD-K99530743-001-01-3:10	BRD-K99530743	10 μM	6 h	-0.122694	0	0	A375
CPC010_A375_6H:BRD-K28029915-066-02-5:10	dolasetron	10 μM	6 h	-0.122631	0	0	A375
CPC006_A375_24H:BRD-K03816923-001-04-7:9.68	rottlerin	10 μM	24 h	-0.122626	0	0	A375
DOS040_A375_24H:BRD-K91269653-001-01-4:4.96	BRD-K91269653	5 μM	24 h	-0.122543	0	0	A375
CPC013_A375_6H:BRD-K07881437-001-01-2:10	danusertib	10 μM	6 h	-0.122542	0	0	A375
DOS049_A375_24H:BRD-K37935437-001-01-0:5	BRD-K37935437	5 μM	24 h	-0.122541	0	0	A375
CPC014_A375_6H:BRD-K66956375-001-05-5:10	oleoylethanolamide	10 μM	6 h	-0.122512	0	0	A375
PCLB001_A375_6H:BRD-K65111630-001-01-8:10	SJB-shh-31	10 μM	6 h	-0.122456	0	0	A375
DOS044_A375_24H:BRD-K19390761-001-01-6:5	BRD-K19390761	5 μM	24 h	-0.122406	0	0	A375
DOS049_A375_24H:BRD-K06111933-001-01-4:5	BRD-K06111933	5 μM	24 h	-0.122405	0	0	A375
CPC008_A375_24H:BRD-K93060291-001-03-9:10	TL-HRAS-24	10 μM	24 h	-0.122405	0	0	A375
CPC017_A375_6H:BRD-K76840893-003-01-7:10	RS-17053	10 μM	6 h	-0.122212	0	0	A375
CPC005_A375_24H:BRD-A30205217-001-03-9:10	ethotoin	10 μM	24 h	-0.122166	0	0	A375
DOS044_A375_24H:BRD-K82335556-001-01-2:5.01	BRD-K82335556	5 μM	24 h	-0.122111	0	0	A375
DOS033_A375_24H:BRD-K23985857-001-01-2:5	BRD-K23985857	5 μM	24 h	-0.122098	0	0	A375
CPC018_A375_6H:BRD-A00758722-001-03-1:10	noretynodrel	10 μM	6 h	-0.122071	0	0	A375
CPC008_A375_6H:BRD-K00910650-001-01-6:10	BRD-K00910650	10 μM	6 h	-0.122057	0	0	A375
DOS042_A375_24H:BRD-K42729412-001-01-9:4.94	BRD-K42729412	5 μM	24 h	-0.121955	0	0	A375
DOS049_A375_24H:BRD-K69077316-001-01-8:5	BRD-K69077316	5 μM	24 h	-0.121857	0	0	A375
DOS039_A375_24H:BRD-K04086909-001-01-0:5.15	BRD-K04086909	5 μM	24 h	-0.121822	0	0	A375
DOS053_A375_24H:BRD-K41878610-001-02-3:5	BRD-K41878610	5 μM	24 h	-0.121796	0	0	A375
DOS046_A375_24H:BRD-K21668646-001-01-2:5	BRD-K21668646	5 μM	24 h	-0.121774	0	0	A375
CPC006_A375_24H:BRD-A75817871-001-04-2:40	blebbistatin	40 μM	24 h	-0.121752	0	0	A375
CPC010_A375_6H:BRD-K52735702-001-01-2:10	cefdinir	10 μM	6 h	-0.121747	0	0	A375
CPC004_A375_6H:BRD-A22032524-074-04-0:10	amlodipine	10 μM	6 h	-0.121739	0	0	A375
CPC007_A375_24H:BRD-A24021119-001-06-0:10	BRD-A24021119	10 μM	24 h	-0.121736	0	0	A375
DOSBIO001_A375_24H:BRD-K30229575:10.1026	BRD-K30229575	10 μM	24 h	-0.121644	0	0	A375
DOS057_A375_24H:BRD-K48193278-001-01-5:5	BRD-K48193278	5 μM	24 h	-0.121643	0	0	A375
DOS034_A375_24H:BRD-K86191692-001-01-0:4.99	BRD-K86191692	5 μM	24 h	-0.121596	0	0	A375
CPC008_A375_6H:BRD-K89997465-001-07-9:10	chlorpromazine	10 μM	6 h	-0.121469	0	0	A375
CPC004_A375_6H:BRD-K13544237-001-01-0:10	r(-)-propylnorapomorphine	10 μM	6 h	-0.121438	0	0	A375
CPC007_A375_6H:BRD-K72504866-001-07-7:10	BRD-K72504866	10 μM	6 h	-0.121406	0	0	A375
DOS042_A375_24H:BRD-K61499353-001-01-6:5.02	BRD-K61499353	5 μM	24 h	-0.121334	0	0	A375
CPC010_A375_6H:BRD-K30197592-001-07-2:10	5-methoxytryptamine	10 μM	6 h	-0.121288	0	0	A375
CPC007_A375_6H:BRD-K35100517-001-03-2:10	BRD-K35100517	10 μM	6 h	-0.121072	0	0	A375
CPC012_A375_6H:BRD-K74710236-001-02-2:10	VU-0410183-2	10 μM	6 h	-0.121022	0	0	A375
CPC013_A375_6H:BRD-K93296644-001-01-7:10	BRD-K93296644	10 μM	6 h	-0.12099	0	0	A375
CPC017_A375_6H:BRD-K14282469-001-01-5:10	LY-165163	10 μM	6 h	-0.120973	0	0	A375
CPC008_A375_24H:BRD-K89093471-001-03-8:10	VU-0418934-2	10 μM	24 h	-0.120949	0	0	A375
DOS049_A375_24H:BRD-K72692763-001-01-7:5	BRD-K72692763	5 μM	24 h	-0.120901	0	0	A375
CPC010_A375_6H:BRD-K97666802-001-05-6:10	PSH-022	10 μM	6 h	-0.120874	0	0	A375
DOSBIO001_A375_24H:BRD-K74043769:10.0677	BRD-K74043769	10 μM	24 h	-0.120871	0	0	A375
CPC005_A375_24H:BRD-K82846253-001-03-0:10	repaglinide	10 μM	24 h	-0.120796	0	0	A375
CPC019_A375_6H:BRD-K94127894-001-01-0:10	SA-89068	10 μM	6 h	-0.120733	0	0	A375
PCLB001_A375_6H:BRD-A70150975-001-01-4:0.16	hydroxyl	100 nM	6 h	-0.12068	0	0	A375
CPC008_A375_24H:BRD-K02437976-019-01-7:10	BRD-K02437976	10 μM	24 h	-0.120601	0	0	A375
CPC018_A375_6H:BRD-K05361803-001-01-3:10	SC-10	10 μM	6 h	-0.120595	0	0	A375
DOS041_A375_24H:BRD-K93007240-001-01-6:5.04	BRD-K93007240	5 μM	24 h	-0.120571	0	0	A375
CPC006_A375_6H:BRD-K25737009-001-02-0:40	CD-1530	40 μM	6 h	-0.120518	0	0	A375
CPC012_A375_6H:BRD-K38519699-001-01-4:10	BRD-K38519699	10 μM	6 h	-0.120515	0	0	A375
DOS044_A375_24H:BRD-K34695725-001-01-4:5.02	BRD-K34695725	5 μM	24 h	-0.12051	0	0	A375
DOS055_A375_24H:BRD-K16552772-001-01-1:5	BRD-K16552772	5 μM	24 h	-0.1205	0	0	A375
CPC007_A375_24H:BRD-K16472144-001-05-4:10	BRD-K16472144	10 μM	24 h	-0.120474	0	0	A375
CPC011_A375_6H:BRD-A11990600-001-02-6:10	lorazepam	10 μM	6 h	-0.120462	0	0	A375
CPC008_A375_6H:BRD-K92202821-001-01-1:10	BRD-K92202821	10 μM	6 h	-0.120415	0	0	A375
BRAF001_A375_6H:BRD-K23984367-001-04-2:10	sorafenib	10 μM	6 h	-0.120401	0	0	A375
DOS052_A375_24H:BRD-K97408390-001-01-0:5.01	BRD-K97408390	5 μM	24 h	-0.120394	0	0	A375
CPC016_A375_6H:BRD-K85383046-001-02-5:10	IAA-94	10 μM	6 h	-0.120384	0	0	A375
CPC019_A375_6H:BRD-K39732687-001-01-6:10	BRD-K39732687	10 μM	6 h	-0.120356	0	0	A375
CPC011_A375_6H:BRD-K96134740-001-01-0:10	kitasamycin	10 μM	6 h	-0.120333	0	0	A375
DOS033_A375_24H:BRD-K66221011-001-01-3:5	BRD-K66221011	5 μM	24 h	-0.120243	0	0	A375
CPC010_A375_6H:BRD-A94297859-001-02-4:10	BRD-A94297859	10 μM	6 h	-0.120153	0	0	A375
CPC018_A375_6H:BRD-K41557448-001-01-3:10	BRD-K41557448	10 μM	6 h	-0.120139	0	0	A375
CPC007_A375_24H:BRD-K18595892-001-09-6:10	BRD-K18595892	10 μM	24 h	-0.120135	0	0	A375
DOS046_A375_24H:BRD-K30373477-001-01-2:5	BRD-K30373477	5 μM	24 h	-0.120098	0	0	A375
CPC017_A375_6H:BRD-K45068323-003-02-1:10	W-13	10 μM	6 h	-0.119999	0	0	A375
CPC013_A375_6H:BRD-U44700465-000-01-4:10	HG-5-88-01	10 μM	6 h	-0.119973	0	0	A375
CPC010_A375_6H:BRD-A37735495-001-10-6:10	BRD-A37735495	10 μM	6 h	-0.119953	0	0	A375
PCLB002_A375_24H:BRD-K98948170:0.37	BRD-K98948170	0.37 μM	24 h	-0.119662	0	0	A375
CPC008_A375_6H:BRD-K16358524-001-01-4:10	BRD-K16358524	10 μM	6 h	-0.119478	0	0	A375
CPC013_A375_6H:BRD-A12643502-001-01-1:10	BRD-A12643502	10 μM	6 h	-0.119476	0	0	A375
DOS033_A375_24H:BRD-K22854900-001-01-8:5.05	BRD-K22854900	5 μM	24 h	-0.119461	0	0	A375
DOS039_A375_24H:BRD-K24282403-001-01-2:5.19	BRD-K24282403	5 μM	24 h	-0.119456	0	0	A375
CPC006_A375_24H:BRD-K85606544-001-01-8:10	neratinib	10 μM	24 h	-0.11944	0	0	A375
DOSBIO002_A375_24H:BRD-K98850601:10.0457	BRD-K98850601	10 μM	24 h	-0.119403	0	0	A375
CPC014_A375_6H:BRD-K41668190-001-01-8:10	BRD-K41668190	10 μM	6 h	-0.119371	0	0	A375
DOS058_A375_24H:BRD-K35376105-019-01-2:5	BRD-K35376105	5 μM	24 h	-0.119314	0	0	A375
DOS044_A375_24H:BRD-K01975855-001-01-1:5	BRD-K01975855	5 μM	24 h	-0.119272	0	0	A375
CPC013_A375_6H:BRD-K85266146-001-01-3:10	BRD-K85266146	10 μM	6 h	-0.11921	0	0	A375
CPC004_A375_6H:BRD-K46317332-003-10-3:10	proadifen	10 μM	6 h	-0.119209	0	0	A375
CPC009_A375_6H:BRD-K74189021-001-01-0:10	BRD-K74189021	10 μM	6 h	-0.119202	0	0	A375
DOSBIO002_A375_24H:BRD-K61001510:9.98494	BRD-K61001510	10 μM	24 h	-0.119177	0	0	A375
CPC010_A375_6H:BRD-K37393297-001-07-8:10	BRD-K37393297	10 μM	6 h	-0.119134	0	0	A375
CPC009_A375_6H:BRD-A42969626-001-01-5:10	BRD-A42969626	10 μM	6 h	-0.119116	0	0	A375
CPC017_A375_6H:BRD-K14821540-001-03-9:10	FCCP	10 μM	6 h	-0.119088	0	0	A375
DOS054_A375_24H:BRD-K15886574-001-01-4:5	BRD-K15886574	5 μM	24 h	-0.119039	0	0	A375
PCLB001_A375_6H:BRD-K58547375-001-02-9:10	BRD-K58547375	10 μM	6 h	-0.119016	0	0	A375
CPC008_A375_6H:BRD-K73044744-001-03-0:10	KU-C104495	10 μM	6 h	-0.11889	0	0	A375
CPC007_A375_24H:BRD-K39345836-001-05-8:10	BRD-K39345836	10 μM	24 h	-0.118775	0	0	A375
CPC009_A375_6H:BRD-K55844427-019-01-5:10	BRD-K55844427	10 μM	6 h	-0.118708	0	0	A375
DOS041_A375_24H:BRD-K49907578-001-01-4:4.95	BRD-K49907578	5 μM	24 h	-0.11868	0	0	A375
CPC014_A375_6H:BRD-U66370498-000-01-0:10	androstanol	10 μM	6 h	-0.118568	0	0	A375
CPC009_A375_6H:BRD-K93155496-019-01-6:10	BRD-K93155496	10 μM	6 h	-0.118551	0	0	A375
DOS041_A375_24H:BRD-K14413722-001-01-9:4.99	BRD-K14413722	5 μM	24 h	-0.118532	0	0	A375
DOSBIO001_A375_24H:BRD-K86786416:10.0451	BRD-K86786416	10 μM	24 h	-0.118516	0	0	A375
DOS054_A375_24H:BRD-K25380050-001-01-9:5	BRD-K25380050	5 μM	24 h	-0.118398	0	0	A375
CPC012_A375_6H:BRD-K56653679-001-01-2:10	MD-041	10 μM	6 h	-0.118354	0	0	A375
CPC012_A375_6H:BRD-K77014406-001-03-8:10	BRD-K77014406	10 μM	6 h	-0.118151	0	0	A375
DOS046_A375_24H:BRD-K85174275-001-01-2:5	BRD-K85174275	5 μM	24 h	-0.118065	0	0	A375
DOS053_A375_24H:BRD-K14415573-001-01-4:4.93	BRD-K14415573	5 μM	24 h	-0.118004	0	0	A375
DOS056_A375_24H:BRD-K45333259-001-01-3:5	BRD-K45333259	5 μM	24 h	-0.117981	0	0	A375
DOS049_A375_24H:BRD-K19385772-001-01-3:5	BRD-K19385772	5 μM	24 h	-0.117883	0	0	A375
DOS040_A375_24H:BRD-K54247306-001-01-6:4.99	BRD-K54247306	5 μM	24 h	-0.117876	0	0	A375
DOS054_A375_24H:BRD-K39911750-001-01-8:5	BRD-K39911750	5 μM	24 h	-0.117863	0	0	A375
CPC008_A375_24H:BRD-K71169984-001-04-4:10	BRD-K71169984	10 μM	24 h	-0.117808	0	0	A375
CPC013_A375_6H:BRD-K19181733-001-01-4:10	BRD-K19181733	10 μM	6 h	-0.117787	0	0	A375
DOS053_A375_24H:BRD-K04230416-001-01-0:4.98	BRD-K04230416	5 μM	24 h	-0.117779	0	0	A375
CPC014_A375_6H:BRD-K98381590-001-01-6:10	RAN-07	10 μM	6 h	-0.117757	0	0	A375
DOS057_A375_24H:BRD-K11989341-001-01-2:5	BRD-K11989341	5 μM	24 h	-0.117702	0	0	A375
CPC004_A375_6H:BRD-K14920963-304-01-9:10	erythrosine	10 μM	6 h	-0.117698	0	0	A375
CPC005_A375_6H:BRD-A44090213-001-15-7:10	indoprofen	10 μM	6 h	-0.11765	0	0	A375
DOS042_A375_24H:BRD-K54589358-001-01-8:4.96	BRD-K54589358	5 μM	24 h	-0.117611	0	0	A375
DOS039_A375_24H:BRD-K08706435-001-01-2:4.76	BRD-K08706435	5 μM	24 h	-0.117568	0	0	A375
DOS041_A375_24H:BRD-K80101280-001-01-3:5.03	BRD-K80101280	5 μM	24 h	-0.117541	0	0	A375
CPC014_A375_6H:BRD-K63350243-001-01-3:10	BRD-K63350243	10 μM	6 h	-0.117536	0	0	A375
CPC016_A375_6H:BRD-K31054881-300-01-3:10	BMY-7378	10 μM	6 h	-0.117521	0	0	A375
DOS057_A375_24H:BRD-K78327149-001-01-9:5	BRD-K78327149	5 μM	24 h	-0.117486	0	0	A375
CPC009_A375_6H:BRD-K31453413-001-05-9:10	BRD-K31453413	10 μM	6 h	-0.117483	0	0	A375
CPC018_A375_6H:BRD-A15914070-001-01-5:10	4-hydroxy-2-nonenal	10 μM	6 h	-0.117363	0	0	A375
CPC010_A375_6H:BRD-K09922072-001-03-8:10	BRD-K09922072	10 μM	6 h	-0.117315	0	0	A375
CPC016_A375_6H:BRD-K70799801-311-02-7:10	quinidine	10 μM	6 h	-0.117275	0	0	A375
PCLB002_A375_24H:BRD-A60070924:0.37	alpha-estradiol	0.37 μM	24 h	-0.117231	0	0	A375
DOS048_A375_24H:BRD-K91758467-001-01-2:5	BRD-K91758467	5 μM	24 h	-0.117201	0	0	A375
CPC019_A375_6H:BRD-A47832959-001-06-6:10	BRD-A47832959	10 μM	6 h	-0.117125	0	0	A375
DOS054_A375_24H:BRD-K40963786-001-01-4:5	BRD-K40963786	5 μM	24 h	-0.11712	0	0	A375
CPC008_A375_6H:BRD-K91449330-001-01-3:10	BRD-K91449330	10 μM	6 h	-0.116927	0	0	A375
CPC005_A375_24H:BRD-A16311756-003-06-9:10	profenamine	10 μM	24 h	-0.116894	0	0	A375
DOS039_A375_24H:BRD-K92953840-001-01-6:5.02	BRD-K92953840	5 μM	24 h	-0.116888	0	0	A375
CPC008_A375_6H:BRD-K08829932-019-01-2:10	BRD-K08829932	10 μM	6 h	-0.116845	0	0	A375
CPC008_A375_6H:BRD-A96746500-019-01-5:10	BRD-A96746500	10 μM	6 h	-0.116769	0	0	A375
DOS039_A375_24H:BRD-K62839271-001-01-1:5.15	BRD-K62839271	5 μM	24 h	-0.116661	0	0	A375
DOS046_A375_24H:BRD-K68078697-001-01-6:5	BRD-K68078697	5 μM	24 h	-0.116659	0	0	A375
DOS034_A375_24H:BRD-K27198330-001-01-5:4.95	BRD-K27198330	5 μM	24 h	-0.116621	0	0	A375
DOS052_A375_24H:BRD-K86843304-001-02-4:5	BRD-K86843304	5 μM	24 h	-0.116614	0	0	A375
CPC019_A375_6H:BRD-K73945663-001-01-9:10	BRD-K73945663	10 μM	6 h	-0.116596	0	0	A375
DOS042_A375_24H:BRD-K70783031-001-01-2:5.11	BRD-K70783031	5 μM	24 h	-0.116591	0	0	A375
DOSBIO002_A375_24H:BRD-K94193354:10.0481	BRD-K94193354	10 μM	24 h	-0.116576	0	0	A375
DOS033_A375_24H:BRD-K79355010-001-01-5:5	BRD-K79355010	5 μM	24 h	-0.116562	0	0	A375
CPC019_A375_6H:BRD-K49010888-001-01-2:10	BRD-K49010888	10 μM	6 h	-0.116539	0	0	A375
DOSBIO002_A375_24H:BRD-K20109053:10.0611	BRD-K20109053	10 μM	24 h	-0.116504	0	0	A375
CPC009_A375_6H:BRD-A84174393-001-28-5:10	meloxicam	10 μM	6 h	-0.116475	0	0	A375
CPC014_A375_6H:BRD-K07061353-001-01-1:10	BRD-K07061353	10 μM	6 h	-0.116416	0	0	A375
DOS041_A375_24H:BRD-K84935712-001-01-8:5.04	BRD-K84935712	5 μM	24 h	-0.116409	0	0	A375
CPC010_A375_6H:BRD-K45763312-001-04-0:10	BRD-K45763312	10 μM	6 h	-0.116407	0	0	A375
DOS055_A375_24H:BRD-K34844610-001-01-6:5	BRD-K34844610	5 μM	24 h	-0.116279	0	0	A375
DOS040_A375_24H:BRD-K92758184-001-01-3:5	BRD-K92758184	5 μM	24 h	-0.116243	0	0	A375
CPC008_A375_24H:BRD-A32917072-001-05-6:10	BRD-A32917072	10 μM	24 h	-0.116191	0	0	A375
CPC006_A375_6H:BRD-K17140735-300-02-4:11.1	SCH-79797	10 μM	6 h	-0.116147	0	0	A375
DOS054_A375_24H:BRD-K82726072-001-01-7:5	BRD-K82726072	5 μM	24 h	-0.116114	0	0	A375
DOS055_A375_24H:BRD-K11742792-001-01-9:5	BRD-K11742792	5 μM	24 h	-0.116073	0	0	A375
DOS057_A375_24H:BRD-K24184187-001-01-2:5	BRD-K24184187	5 μM	24 h	-0.116068	0	0	A375
DOSBIO001_A375_24H:BRD-K19011062:10.0222	BRD-K19011062	10 μM	24 h	-0.116065	0	0	A375
CPC006_A375_24H:BRD-K01877528-001-01-6:10	TL-HRAS-61	10 μM	24 h	-0.11605	0	0	A375
CPC004_A375_6H:BRD-K04877770-001-03-4:10	FTase-inhibitor-B581	10 μM	6 h	-0.116048	0	0	A375
DOS033_A375_24H:BRD-K07064094-001-01-9:4.76	BRD-K07064094	5 μM	24 h	-0.115979	0	0	A375
CPC010_A375_6H:BRD-K59597909-001-14-3:10	phenothiazine	10 μM	6 h	-0.115966	0	0	A375
CPC007_A375_6H:BRD-K28112517-001-06-9:10	BRD-K28112517	10 μM	6 h	-0.115957	0	0	A375
CPC010_A375_6H:BRD-K04430056-001-14-4:10	7-nitroindazole	10 μM	6 h	-0.115951	0	0	A375
DOS039_A375_24H:BRD-K19597888-001-01-4:4.95	BRD-K19597888	5 μM	24 h	-0.11595	0	0	A375
DOSBIO002_A375_24H:BRD-K05778745:10.0323	BRD-K05778745	10 μM	24 h	-0.115916	0	0	A375
DOS040_A375_24H:BRD-K63922933-001-01-4:4.95	BRD-K63922933	5 μM	24 h	-0.115894	0	0	A375
CPC008_A375_6H:BRD-K23412959-001-05-5:10	BRD-K23412959	10 μM	6 h	-0.11587	0	0	A375
DOS041_A375_24H:BRD-K04515815-001-01-1:5.02	BRD-K04515815	5 μM	24 h	-0.11583	0	0	A375
DOS040_A375_24H:BRD-K62724755-001-01-0:5.01	BRD-K62724755	5 μM	24 h	-0.11579	0	0	A375
CPC008_A375_6H:BRD-K08640787-001-01-7:10	BRD-K08640787	10 μM	6 h	-0.115738	0	0	A375
DOS034_A375_24H:BRD-K31999759-001-01-2:5.02	BRD-K31999759	5 μM	24 h	-0.115689	0	0	A375
DOS055_A375_24H:BRD-K12655851-001-01-0:5	BRD-K12655851	5 μM	24 h	-0.115636	0	0	A375
CPC007_A375_6H:BRD-K38012662-001-11-2:10	BRD-K38012662	10 μM	6 h	-0.115582	0	0	A375
CPC017_A375_6H:BRD-K40919711-001-02-4:10	BAPTA-AM	10 μM	6 h	-0.115544	0	0	A375
DOS055_A375_24H:BRD-K58043213-001-01-7:5	BRD-K58043213	5 μM	24 h	-0.115544	0	0	A375
DOSBIO001_A375_24H:BRD-K62242359:10.5421	BRD-K62242359	10 μM	24 h	-0.115514	0	0	A375
DOS048_A375_24H:BRD-K19405573-001-01-0:4.95	BRD-K19405573	5 μM	24 h	-0.115489	0	0	A375
DOS053_A375_24H:BRD-K40098720-001-01-8:5.05	BRD-K40098720	5 μM	24 h	-0.115471	0	0	A375
CPC018_A375_6H:BRD-K15616905-001-01-5:10	CCCP	10 μM	6 h	-0.115466	0	0	A375
CPC007_A375_24H:BRD-K28452084-001-05-4:10	BRD-K28452084	10 μM	24 h	-0.115461	0	0	A375
CPC012_A375_6H:BRD-K87432599-001-01-1:10	BRD-K87432599	10 μM	6 h	-0.115435	0	0	A375
CPC010_A375_6H:BRD-K82384352-001-02-4:10	BRD-K82384352	10 μM	6 h	-0.115402	0	0	A375
DOS049_A375_24H:BRD-K33385950-001-01-9:5	BRD-K33385950	5 μM	24 h	-0.115391	0	0	A375
CPC011_A375_6H:BRD-K39915878-036-21-0:10	loxapine	10 μM	6 h	-0.115376	0	0	A375
DOSBIO001_A375_24H:BRD-K08317416:10.1576	BRD-K08317416	10 μM	24 h	-0.115368	0	0	A375
DOS055_A375_24H:BRD-K00859238-001-01-6:5	BRD-K00859238	5 μM	24 h	-0.115362	0	0	A375
CPC013_A375_6H:BRD-K11540476-001-04-4:10	EMF-BCA1-64	10 μM	6 h	-0.115324	0	0	A375
DOSBIO002_A375_24H:BRD-K58808184:9.81336	BRD-K58808184	10 μM	24 h	-0.11532	0	0	A375
CPC018_A375_6H:BRD-K18787491-001-07-8:10	U-0126	10 μM	6 h	-0.115319	0	0	A375
DOS054_A375_24H:BRD-K14246967-001-01-7:5	BRD-K14246967	5 μM	24 h	-0.115312	0	0	A375
CPC017_A375_6H:BRD-K28806945-001-01-9:10	L-750667	10 μM	6 h	-0.115285	0	0	A375
BRAF001_A375_6H:BRD-A03427350-001-02-1:2.5	sulindac	3 μM	6 h	-0.115259	0	0	A375
DOS055_A375_24H:BRD-K56473018-001-01-5:5	BRD-K56473018	5 μM	24 h	-0.115172	0	0	A375
DOS041_A375_24H:BRD-K21630495-001-01-4:5.07	BRD-K21630495	5 μM	24 h	-0.115136	0	0	A375
CPC018_A375_6H:BRD-K46836114-001-04-3:10	BRD-K46836114	10 μM	6 h	-0.115095	0	0	A375
CPC006_A375_6H:BRD-K04887706-001-01-6:9.1	AKT-inhibitor-1-2	10 μM	6 h	-0.115058	0	0	A375
DOS046_A375_24H:BRD-K02131961-001-01-1:5	BRD-K02131961	5 μM	24 h	-0.115032	0	0	A375
CPC006_A375_24H:BRD-K61033289-001-01-2:10	15-delta-prostaglandin-j2	10 μM	24 h	-0.115011	0	0	A375
CPC009_A375_6H:BRD-K42499654-001-06-5:10	BRD-K42499654	10 μM	6 h	-0.114959	0	0	A375
CPC010_A375_6H:BRD-K21788104-001-10-4:10	BRD-K21788104	10 μM	6 h	-0.114953	0	0	A375
CPC004_A375_6H:BRD-K64614248-001-06-5:10	salicin	10 μM	6 h	-0.114924	0	0	A375
DOS053_A375_24H:BRD-K14862006-001-01-4:4.87	BRD-K14862006	5 μM	24 h	-0.114903	0	0	A375
CPC020_A375_6H:BRD-A25067867-066-14-3:10	benzatropine	10 μM	6 h	-0.114855	0	0	A375
DOS041_A375_24H:BRD-K74370838-001-01-9:4.98	BRD-K74370838	5 μM	24 h	-0.114812	0	0	A375
DOS049_A375_24H:BRD-K72947048-001-01-2:5	BRD-K72947048	5 μM	24 h	-0.114799	0	0	A375
CPC020_A375_6H:BRD-K06666320-001-06-7:10	MW-STK33-23	10 μM	6 h	-0.114676	0	0	A375
DOS034_A375_24H:BRD-K20531360-001-01-7:5.06	BRD-K20531360	5 μM	24 h	-0.114666	0	0	A375
CPC013_A375_6H:BRD-K58347372-001-02-7:10	BRD-K58347372	10 μM	6 h	-0.114663	0	0	A375
DOSBIO002_A375_24H:BRD-K23958338:10.1456	BRD-K23958338	10 μM	24 h	-0.114662	0	0	A375
CPC009_A375_6H:BRD-K39866321-001-04-8:10	BRD-K39866321	10 μM	6 h	-0.114627	0	0	A375
PCLB003_A375_24H:BRD-K42573370-001-01-1:0.04	avrainvillamide-analog-2	0.04 μM	24 h	-0.114587	0	0	A375
DOS056_A375_24H:BRD-K46746428-001-01-1:5	BRD-K46746428	5 μM	24 h	-0.11458	0	0	A375
DOS039_A375_24H:BRD-K87885716-001-01-8:5.01	BRD-K87885716	5 μM	24 h	-0.11454	0	0	A375
CPC009_A375_6H:BRD-K42489623-001-06-4:10	BRD-K42489623	10 μM	6 h	-0.1145	0	0	A375
CPC008_A375_6H:BRD-K05979026-019-01-5:10	BRD-K05979026	10 μM	6 h	-0.114475	0	0	A375
CPC006_A375_24H:BRD-K15563106-001-08-1:177.6	phloretin	100 μM	24 h	-0.114463	0	0	A375
CPC005_A375_6H:BRD-K66404838-003-03-8:10	nalbuphine	10 μM	6 h	-0.114409	0	0	A375
DOSBIO001_A375_24H:BRD-K18300217:10.0476	BRD-K18300217	10 μM	24 h	-0.114394	0	0	A375
DOS058_A375_24H:BRD-K42843595-001-01-7:5	BRD-K42843595	5 μM	24 h	-0.114385	0	0	A375
DOS039_A375_24H:BRD-K92604082-001-01-2:4.88	BRD-K92604082	5 μM	24 h	-0.114375	0	0	A375
DOS048_A375_24H:BRD-K62734359-001-01-9:5.05	BRD-K62734359	5 μM	24 h	-0.114232	0	0	A375
CPC008_A375_6H:BRD-K76079827-001-01-7:10	BRD-K76079827	10 μM	6 h	-0.114184	0	0	A375
DOS054_A375_24H:BRD-K74152472-001-01-2:5	BRD-K74152472	5 μM	24 h	-0.114182	0	0	A375
CPC004_A375_6H:BRD-K08252256-236-17-1:10	diclofenac	10 μM	6 h	-0.114063	0	0	A375
CPC008_A375_6H:BRD-K32636001-001-01-5:10	BRD-K32636001	10 μM	6 h	-0.114036	0	0	A375
CPC015_A375_6H:BRD-A01593789-001-02-3:10	chlormadinone-acetate	10 μM	6 h	-0.113986	0	0	A375
DOS057_A375_24H:BRD-K60159779-001-01-3:5	BRD-K60159779	5 μM	24 h	-0.113981	0	0	A375
DOS039_A375_24H:BRD-K22778679-001-01-8:5.15	BRD-K22778679	5 μM	24 h	-0.113956	0	0	A375
CPC011_A375_6H:BRD-K15502390-001-15-9:10	nevirapine	10 μM	6 h	-0.113873	0	0	A375
DOSBIO001_A375_24H:BRD-K77888550:9.5278	BRD-K77888550	10 μM	24 h	-0.113866	0	0	A375
CPC007_A375_6H:BRD-A76490030-001-09-4:10	K784-3131	10 μM	6 h	-0.113858	0	0	A375
CPC007_A375_24H:BRD-K83589469-001-05-0:10	BRD-K83589469	10 μM	24 h	-0.11384	0	0	A375
CPC012_A375_6H:BRD-K22828899-001-01-5:10	TUL-XXI039	10 μM	6 h	-0.113797	0	0	A375
DOS054_A375_24H:BRD-K54408195-001-01-8:5	BRD-K54408195	5 μM	24 h	-0.113785	0	0	A375
CPC013_A375_6H:BRD-K89558221-001-01-7:10	BRD-K89558221	10 μM	6 h	-0.113784	0	0	A375
CPC008_A375_6H:BRD-K92343999-001-03-5:10	KU-C104253	10 μM	6 h	-0.113719	0	0	A375
CPC007_A375_6H:BRD-A41630653-001-05-1:10	BRD-A41630653	10 μM	6 h	-0.113709	0	0	A375
DOSBIO001_A375_24H:BRD-K56208365:9.99744	BRD-K56208365	10 μM	24 h	-0.113694	0	0	A375
DOS049_A375_24H:BRD-K74919500-001-01-0:5	BRD-K74919500	5 μM	24 h	-0.113651	0	0	A375
CPC015_A375_6H:BRD-K66296774-001-02-0:10	fluvastatin	10 μM	6 h	-0.113621	0	0	A375
DOS042_A375_24H:BRD-K78948132-001-01-1:5.02	BRD-K78948132	5 μM	24 h	-0.113535	0	0	A375
CPC009_A375_6H:BRD-K71540055-019-01-8:10	BRD-K71540055	10 μM	6 h	-0.113526	0	0	A375
PCLB003_A375_24H:BRD-K56411643-001-02-6:0.37	BRD-K56411643	0.37 μM	24 h	-0.113513	0	0	A375
CPC005_A375_6H:BRD-A67479912-001-02-6:10	progesterone	10 μM	6 h	-0.113502	0	0	A375
DOS044_A375_24H:BRD-K87081268-001-01-6:5.06	BRD-K87081268	5 μM	24 h	-0.113474	0	0	A375
DOS041_A375_24H:BRD-K45496021-001-01-5:5.04	BRD-K45496021	5 μM	24 h	-0.113425	0	0	A375
DOS046_A375_24H:BRD-K30275524-001-01-2:5	BRD-K30275524	5 μM	24 h	-0.113424	0	0	A375
CPC009_A375_6H:BRD-K38483076-001-03-2:10	KU-C103655	10 μM	6 h	-0.113422	0	0	A375
CPC016_A375_6H:BRD-K07762753-001-02-8:10	aminopurvalanol-a	10 μM	6 h	-0.113363	0	0	A375
CPC015_A375_6H:BRD-A42167015-003-03-7:10	carteolol	10 μM	6 h	-0.113265	0	0	A375
CPC005_A375_24H:BRD-K06467078-003-03-7:10	corynanthine	10 μM	24 h	-0.113245	0	0	A375
CPC008_A375_24H:BRD-K57044355-001-01-4:10	BRD-K57044355	10 μM	24 h	-0.113179	0	0	A375
DOS053_A375_24H:BRD-K16910145-001-01-1:4.98	BRD-K16910145	5 μM	24 h	-0.113142	0	0	A375
CPC016_A375_6H:BRD-K54330070-001-07-1:10	SB-202190	10 μM	6 h	-0.113103	0	0	A375
CPC008_A375_24H:BRD-K79414420-019-01-6:10	BRD-K79414420	10 μM	24 h	-0.11304	0	0	A375
DOS034_A375_24H:BRD-K47396627-001-01-3:4.99	BRD-K47396627	5 μM	24 h	-0.113013	0	0	A375
CPC016_A375_6H:BRD-K28115081-001-01-9:10	apafant	10 μM	6 h	-0.112977	0	0	A375
CPC007_A375_24H:BRD-K35389996-001-05-6:10	BRD-K35389996	10 μM	24 h	-0.112962	0	0	A375
CPC013_A375_6H:BRD-A25569250-001-01-7:10	KI-16425	10 μM	6 h	-0.112914	0	0	A375
CPC013_A375_6H:BRD-K63549648-001-01-1:10	BRD-K63549648	10 μM	6 h	-0.112899	0	0	A375
DOS053_A375_24H:BRD-K95422182-001-02-3:5.01	BRD-K95422182	5 μM	24 h	-0.112892	0	0	A375
DOS052_A375_24H:BRD-K43438744-001-02-3:5	BRD-K43438744	5 μM	24 h	-0.112872	0	0	A375
CPC006_A375_6H:BRD-A24054354-001-05-7:10	BRD-A24054354	10 μM	6 h	-0.112766	0	0	A375
DOS047_A375_24H:BRD-K18542345-001-01-8:4.93	BRD-K18542345	5 μM	24 h	-0.112759	0	0	A375
DOS049_A375_24H:BRD-K69048763-001-01-7:5	BRD-K69048763	5 μM	24 h	-0.112656	0	0	A375
CPC013_A375_6H:BRD-K33606495-001-01-0:10	BRD-K33606495	10 μM	6 h	-0.112588	0	0	A375
CPC018_A375_6H:BRD-K91263825-001-03-6:10	nortriptyline	10 μM	6 h	-0.112583	0	0	A375
CPC019_A375_6H:BRD-K80602561-001-01-0:10	BRD-K80602561	10 μM	6 h	-0.112579	0	0	A375
CPC008_A375_24H:BRD-K62466453-001-04-7:10	BRD-K62466453	10 μM	24 h	-0.112578	0	0	A375
CPC014_A375_6H:BRD-U74615290-000-01-8:10	THZ-2-98-01	10 μM	6 h	-0.112477	0	0	A375
DOS041_A375_24H:BRD-K75467206-001-01-6:5.01	BRD-K75467206	5 μM	24 h	-0.112474	0	0	A375
DOS041_A375_24H:BRD-K32049912-001-01-9:5.03	BRD-K32049912	5 μM	24 h	-0.112413	0	0	A375
CPC010_A375_6H:BRD-K21614065-001-06-7:10	BRD-K21614065	10 μM	6 h	-0.112383	0	0	A375
CPC018_A375_6H:BRD-A14395271-001-01-5:10	mesoridazine	10 μM	6 h	-0.112379	0	0	A375
DOS054_A375_24H:BRD-K30507268-001-01-8:5	BRD-K30507268	5 μM	24 h	-0.11235	0	0	A375
DOS055_A375_24H:BRD-K09324015-001-01-1:5	BRD-K09324015	5 μM	24 h	-0.112333	0	0	A375
DOS054_A375_24H:BRD-K24698610-001-01-8:5	BRD-K24698610	5 μM	24 h	-0.112326	0	0	A375
CPC010_A375_6H:BRD-K00234327-036-04-4:10	RU-24969	10 μM	6 h	-0.112173	0	0	A375
CPC011_A375_6H:BRD-K04196797-001-19-4:10	oxcarbazepine	10 μM	6 h	-0.11217	0	0	A375
CPC011_A375_6H:BRD-K96740444-003-07-6:10	itopride	10 μM	6 h	-0.112085	0	0	A375
CPC009_A375_6H:BRD-A89047717-001-03-0:10	KU-C103654	10 μM	6 h	-0.112045	0	0	A375
CPC009_A375_6H:BRD-K89786160-019-01-9:10	BRD-K89786160	10 μM	6 h	-0.112014	0	0	A375
DOS055_A375_24H:BRD-K84039354-001-01-2:5	BRD-K84039354	5 μM	24 h	-0.111926	0	0	A375
CPC009_A375_6H:BRD-A16998493-001-01-6:10	etodolac	10 μM	6 h	-0.111923	0	0	A375
CPC007_A375_6H:BRD-K44929916-001-05-5:10	JAS07-005	10 μM	6 h	-0.111917	0	0	A375
CPC014_A375_6H:BRD-K23192422-001-01-1:10	lestaurtinib	10 μM	6 h	-0.111917	0	0	A375
DOSBIO001_A375_24H:BRD-K92543914:10.1247	BRD-K92543914	10 μM	24 h	-0.111828	0	0	A375
DOS033_A375_24H:BRD-K76859558-001-01-7:5.03	BRD-K76859558	5 μM	24 h	-0.111817	0	0	A375
CPC011_A375_6H:BRD-A96107863-001-10-0:10	nisoldipine	10 μM	6 h	-0.111807	0	0	A375
DOS048_A375_24H:BRD-K13782405-001-01-2:5	BRD-K13782405	5 μM	24 h	-0.111731	0	0	A375
CPC018_A375_6H:BRD-K27499107-001-03-4:10	carbacyclin	10 μM	6 h	-0.111723	0	0	A375
DOS057_A375_24H:BRD-K45986013-001-01-5:5	BRD-K45986013	5 μM	24 h	-0.111723	0	0	A375
DOS044_A375_24H:BRD-K87931030-001-01-9:5	BRD-K87931030	5 μM	24 h	-0.11172	0	0	A375
CPC009_A375_6H:BRD-A16820783-001-06-0:10	BRD-A16820783	10 μM	6 h	-0.11169	0	0	A375
DOSBIO001_A375_24H:BRD-K79758054:9.94011	BRD-K79758054	10 μM	24 h	-0.111686	0	0	A375
DOS046_A375_24H:BRD-K86764949-001-01-5:5	BRD-K86764949	5 μM	24 h	-0.11162	0	0	A375
CPC006_A375_24H:BRD-K99818283-001-01-8:10	PIK-90	10 μM	24 h	-0.111598	0	0	A375
CPC006_A375_6H:BRD-K74402642-003-01-2:10	NSC-632839	10 μM	6 h	-0.111592	0	0	A375
DOS042_A375_24H:BRD-K96121225-001-01-1:4.85	BRD-K96121225	5 μM	24 h	-0.11154	0	0	A375
DOS043_A375_24H:BRD-K60558875-001-01-9:5.34	BRD-K60558875	5 μM	24 h	-0.111538	0	0	A375
DOSBIO001_A375_24H:BRD-K70074151:9.24575	BRD-K70074151	10 μM	24 h	-0.111504	0	0	A375
CPC008_A375_24H:BRD-K43637719-001-03-9:10	KU-C104141	10 μM	24 h	-0.111412	0	0	A375
DOS057_A375_24H:BRD-K89951364-001-01-1:5	BRD-K89951364	5 μM	24 h	-0.111397	0	0	A375
CPC017_A375_6H:BRD-K68507560-003-15-4:10	dicycloverine	10 μM	6 h	-0.111298	0	0	A375
CPC015_A375_6H:BRD-K19136521-001-03-0:10	indirubin-3-monoxime	10 μM	6 h	-0.111266	0	0	A375
CPC016_A375_6H:BRD-K96862998-001-03-1:10	pirfenidone	10 μM	6 h	-0.111262	0	0	A375
DOS057_A375_24H:BRD-K36627189-001-01-4:5	BRD-K36627189	5 μM	24 h	-0.111241	0	0	A375
DOS039_A375_24H:BRD-K34433706-001-01-3:4.95	BRD-K34433706	5 μM	24 h	-0.111195	0	0	A375
DOSBIO001_A375_24H:BRD-K39597586:9.9142	BRD-K39597586	10 μM	24 h	-0.111194	0	0	A375
CPC012_A375_6H:BRD-K53816294-001-01-3:10	BRD-K53816294	10 μM	6 h	-0.111185	0	0	A375
CPC007_A375_24H:BRD-K65741250-001-05-2:10	PSH-028	10 μM	24 h	-0.111081	0	0	A375
CPC008_A375_6H:BRD-K61127831-001-01-5:10	VU-0413247-1	10 μM	6 h	-0.110969	0	0	A375
CPC007_A375_6H:BRD-K89692698-001-08-3:10	BRD-K89692698	10 μM	6 h	-0.11094	0	0	A375
CPC011_A375_6H:BRD-A09056319-001-07-1:10	alfuzosin	10 μM	6 h	-0.110876	0	0	A375
DOS046_A375_24H:BRD-K24755528-001-01-7:5	BRD-K24755528	5 μM	24 h	-0.110855	0	0	A375
CPC006_A375_6H:BRD-K06593056-001-02-2:20	LE-135	20 μM	6 h	-0.110803	0	0	A375
DOSBIO001_A375_24H:BRD-K85197047:9.90054	BRD-K85197047	10 μM	24 h	-0.110684	0	0	A375
DOS040_A375_24H:BRD-K76454674-001-01-6:5.02	BRD-K76454674	5 μM	24 h	-0.110615	0	0	A375
CPC008_A375_24H:BRD-K49183052-019-01-9:10	VU-0415113-1	10 μM	24 h	-0.110583	0	0	A375
DOS047_A375_24H:BRD-K53407305-001-01-8:5	BRD-K53407305	5 μM	24 h	-0.110567	0	0	A375
DOS044_A375_24H:BRD-K66115910-001-02-7:5	BRD-K66115910	5 μM	24 h	-0.110517	0	0	A375
DOS049_A375_24H:BRD-K98569658-001-01-5:5	BRD-K98569658	5 μM	24 h	-0.110484	0	0	A375
CPC018_A375_6H:BRD-K47105409-001-09-5:10	AG-490	10 μM	6 h	-0.110419	0	0	A375
PCLB001_A375_24H:BRD-K37417543-001-01-0:0.63	MW-SHH-28	500 nM	24 h	-0.110402	0	0	A375
DOS057_A375_24H:BRD-K14989056-001-01-4:5	BRD-K14989056	5 μM	24 h	-0.110339	0	0	A375
DOS057_A375_24H:BRD-K38451408-001-01-2:5	BRD-K38451408	5 μM	24 h	-0.110334	0	0	A375
CPC007_A375_24H:BRD-K06956503-001-02-0:10	BRD-K06956503	10 μM	24 h	-0.110314	0	0	A375
CPC007_A375_6H:BRD-K04779531-001-05-7:10	BRD-K04779531	10 μM	6 h	-0.110302	0	0	A375
CPC009_A375_6H:BRD-A42571354-001-03-3:10	cetirizine	10 μM	6 h	-0.110297	0	0	A375
CPC008_A375_6H:BRD-K40441731-001-01-7:10	BRD-K40441731	10 μM	6 h	-0.110282	0	0	A375
DOS041_A375_24H:BRD-K56945204-001-01-6:5.04	BRD-K56945204	5 μM	24 h	-0.110193	0	0	A375
PCLB003_A375_24H:BRD-K79877282-001-02-7:1.11	PF-543	1.11 μM	24 h	-0.110188	0	0	A375
DOS047_A375_24H:BRD-K50868745-001-01-2:5	BRD-K50868745	5 μM	24 h	-0.110187	0	0	A375
CPC016_A375_6H:BRD-K91370081-001-10-3:10	anisomycin	10 μM	6 h	-0.110177	0	0	A375
DOS040_A375_24H:BRD-K09852122-001-01-1:5.02	BRD-K09852122	5 μM	24 h	-0.110124	0	0	A375
DOS039_A375_24H:BRD-K01289045-001-01-8:5.02	BRD-K01289045	5 μM	24 h	-0.110113	0	0	A375
DOS048_A375_24H:BRD-K70797508-001-01-6:5.03	BRD-K70797508	5 μM	24 h	-0.110029	0	0	A375
CPC004_A375_6H:BRD-A01643550-001-03-1:10	prednisolone-acetate	10 μM	6 h	-0.109902	0	0	A375
DOS043_A375_24H:BRD-K37405154-001-01-5:4.9	BRD-K37405154	5 μM	24 h	-0.109832	0	0	A375
CPC008_A375_6H:BRD-K91442916-001-03-6:10	CAM-9-026	10 μM	6 h	-0.109813	0	0	A375
CPC010_A375_6H:BRD-A01826957-093-13-7:10	xanthinol	10 μM	6 h	-0.109789	0	0	A375
CPC009_A375_6H:BRD-K27539181-001-05-1:10	BRD-K27539181	10 μM	6 h	-0.109772	0	0	A375
DOS034_A375_24H:BRD-K36206486-001-01-7:4.97	BRD-K36206486	5 μM	24 h	-0.109767	0	0	A375
CPC008_A375_6H:BRD-K70917163-001-04-0:10	BRD-K70917163	10 μM	6 h	-0.109749	0	0	A375
CPC005_A375_6H:BRD-A65145453-001-02-0:10	ATPA	10 μM	6 h	-0.109696	0	0	A375
DOS043_A375_24H:BRD-K64801282-001-01-6:4.85	BRD-K64801282	5 μM	24 h	-0.109686	0	0	A375
CPC008_A375_6H:BRD-K16940042-001-01-2:10	BRD-K16940042	10 μM	6 h	-0.109633	0	0	A375
DOS041_A375_24H:BRD-K73336648-001-01-1:4.98	BRD-K73336648	5 μM	24 h	-0.109633	0	0	A375
DOS054_A375_24H:BRD-K61102260-001-01-8:5	BRD-K61102260	5 μM	24 h	-0.10958	0	0	A375
DOSBIO001_A375_24H:BRD-K70697816:10.0481	BRD-K70697816	10 μM	24 h	-0.109508	0	0	A375
DOS058_A375_24H:BRD-K81600610-019-01-6:5	BRD-K81600610	5 μM	24 h	-0.109495	0	0	A375
CPC004_A375_6H:BRD-K12513978-001-16-7:10	fenbufen	10 μM	6 h	-0.109476	0	0	A375
CPC017_A375_6H:BRD-K62289640-003-01-9:10	lylamine	10 μM	6 h	-0.109434	0	0	A375
DOS049_A375_24H:BRD-K81838897-001-01-4:5	BRD-K81838897	5 μM	24 h	-0.109424	0	0	A375
CPC018_A375_6H:BRD-A91452556-001-03-2:10	estradiol-cypionate	10 μM	6 h	-0.109385	0	0	A375
CPC010_A375_6H:BRD-A18411371-001-10-6:10	BRD-A18411371	10 μM	6 h	-0.109351	0	0	A375
CPC015_A375_6H:BRD-A83326220-001-04-2:10	brazilin	10 μM	6 h	-0.109303	0	0	A375
CPC013_A375_6H:BRD-K09854848-001-01-0:10	MD-II-008-P	10 μM	6 h	-0.109269	0	0	A375
CPC009_A375_6H:BRD-K40373196-001-04-4:10	KU-C104337	10 μM	6 h	-0.109231	0	0	A375
DOS054_A375_24H:BRD-K75101679-001-01-9:5	BRD-K75101679	5 μM	24 h	-0.109187	0	0	A375
CPC006_A375_24H:BRD-K67868012-003-01-5:11.1	PI-103	10 μM	24 h	-0.109115	0	0	A375
CPC019_A375_6H:BRD-K35429092-001-01-2:10	BRD-K35429092	10 μM	6 h	-0.109102	0	0	A375
DOSBIO002_A375_24H:BRD-K85650383:9.72154	BRD-K85650383	10 μM	24 h	-0.109076	0	0	A375
DOS040_A375_24H:BRD-K18999740-001-01-1:5.03	BRD-K18999740	5 μM	24 h	-0.109051	0	0	A375
DOSBIO001_A375_24H:BRD-K06188347:9.90407	BRD-K06188347	10 μM	24 h	-0.109049	0	0	A375
DOS055_A375_24H:BRD-K12302379-001-01-2:5	BRD-K12302379	5 μM	24 h	-0.108994	0	0	A375
DOS057_A375_24H:BRD-K01193369-001-01-0:5	BRD-K01193369	5 μM	24 h	-0.108991	0	0	A375
CPC017_A375_6H:BRD-K39111395-001-01-6:10	BCL2-inhibitor	10 μM	6 h	-0.108959	0	0	A375
CPC004_A375_6H:BRD-A19195498-050-09-1:10	trimipramine	10 μM	6 h	-0.108953	0	0	A375
DOS043_A375_24H:BRD-K67236950-001-01-3:5.34	BRD-K67236950	5 μM	24 h	-0.108944	0	0	A375
CPC015_A375_6H:BRD-K03109492-001-01-4:10	NSC-663284	10 μM	6 h	-0.10887	0	0	A375
CPC012_A375_6H:BRD-K61776140-001-01-5:10	BRD-K61776140	10 μM	6 h	-0.108841	0	0	A375
DOS042_A375_24H:BRD-K21558506-001-01-4:4.95	BRD-K21558506	5 μM	24 h	-0.108839	0	0	A375
DOS054_A375_24H:BRD-K85312201-001-01-7:5	BRD-K85312201	5 μM	24 h	-0.108696	0	0	A375
CPC017_A375_6H:BRD-K68332390-001-03-3:10	ponalrestat	10 μM	6 h	-0.108659	0	0	A375
CPC018_A375_6H:BRD-K08619838-300-03-2:10	tremorine	10 μM	6 h	-0.108618	0	0	A375
DOS041_A375_24H:BRD-K77931347-001-01-9:5.08	BRD-K77931347	5 μM	24 h	-0.108618	0	0	A375
CPC007_A375_6H:BRD-K14048378-001-06-9:10	BRD-K14048378	10 μM	6 h	-0.108579	0	0	A375
CPC009_A375_6H:BRD-A22256192-001-14-8:10	terazosin	10 μM	6 h	-0.108429	0	0	A375
DOS056_A375_24H:BRD-K93419974-001-01-5:5	BRD-K93419974	5 μM	24 h	-0.108414	0	0	A375
DOS054_A375_24H:BRD-K32407455-001-01-2:5	BRD-K32407455	5 μM	24 h	-0.108388	0	0	A375
CPC015_A375_6H:BRD-A97674275-001-04-3:10	ranolazine	10 μM	6 h	-0.108341	0	0	A375
CPC016_A375_6H:BRD-K35189033-001-03-0:10	levonorgestrel	10 μM	6 h	-0.108341	0	0	A375
DOS044_A375_24H:BRD-K23123734-001-01-9:5.01	BRD-K23123734	5 μM	24 h	-0.108328	0	0	A375
DOS053_A375_24H:BRD-K97373677-001-02-8:5	BRD-K97373677	5 μM	24 h	-0.1083	0	0	A375
DOS040_A375_24H:BRD-K92493271-001-01-1:4.95	BRD-K92493271	5 μM	24 h	-0.108273	0	0	A375
CPC019_A375_6H:BRD-K74271701-001-01-3:10	BRD-K74271701	10 μM	6 h	-0.108262	0	0	A375
PCLB001_A375_6H:BRD-K14700434-001-02-6:0.16	MW-SHH-151	100 nM	6 h	-0.108257	0	0	A375
CPC009_A375_6H:BRD-K10806285-001-05-8:10	BRD-K10806285	10 μM	6 h	-0.10824	0	0	A375
DOS054_A375_24H:BRD-K35307739-001-01-9:5	BRD-K35307739	5 μM	24 h	-0.108214	0	0	A375
CPC017_A375_6H:BRD-K67080878-001-05-5:10	milrinone	10 μM	6 h	-0.108205	0	0	A375
CPC008_A375_6H:BRD-K41185612-001-01-3:10	BRD-K41185612	10 μM	6 h	-0.108115	0	0	A375
CPC004_A375_6H:BRD-K67017579-001-16-6:10	cilostazol	10 μM	6 h	-0.1081	0	0	A375
CPC018_A375_6H:BRD-K15025317-001-11-0:10	BAY-11-7082	10 μM	6 h	-0.108065	0	0	A375
DOS053_A375_24H:BRD-K96543798-001-02-1:5	BRD-K96543798	5 μM	24 h	-0.108047	0	0	A375
DOS049_A375_24H:BRD-K14489740-001-01-7:5	BRD-K14489740	5 μM	24 h	-0.108015	0	0	A375
CPC007_A375_24H:BRD-K63569039-001-04-0:10	BRD-K63569039	10 μM	24 h	-0.107977	0	0	A375
CPC016_A375_6H:BRD-A64977602-001-04-3:10	mirtazapine	10 μM	6 h	-0.107923	0	0	A375
DOS041_A375_24H:BRD-K30361687-001-01-3:4.99	BRD-K30361687	5 μM	24 h	-0.107889	0	0	A375
CPC007_A375_6H:BRD-K48974000-001-06-2:10	BRD-K48974000	10 μM	6 h	-0.107859	0	0	A375
CPC020_A375_6H:BRD-K12219985-001-21-2:10	glipizide	10 μM	6 h	-0.107857	0	0	A375
DOS040_A375_24H:BRD-K10951564-001-01-3:5.03	BRD-K10951564	5 μM	24 h	-0.107848	0	0	A375
CPC019_A375_6H:BRD-K48803730-001-01-1:10	BRD-K48803730	10 μM	6 h	-0.107827	0	0	A375
CPC009_A375_6H:BRD-K32318651-001-15-3:10	acyclovir	10 μM	6 h	-0.107819	0	0	A375
CPC005_A375_24H:BRD-A93477898-001-03-4:10	PETCM	10 μM	24 h	-0.107775	0	0	A375
DOS044_A375_24H:BRD-K98466889-001-03-1:5	BRD-K98466889	5 μM	24 h	-0.107763	0	0	A375
PCLB003_A375_24H:BRD-K50324045-001-01-3:0.12	avrainvillamide-analog-6	0.12 μM	24 h	-0.107719	0	0	A375
CPC007_A375_6H:BRD-K59761766-001-05-5:10	BRD-K59761766	10 μM	6 h	-0.107664	0	0	A375
CPC015_A375_6H:BRD-K41731458-001-04-5:10	triclosan	10 μM	6 h	-0.107629	0	0	A375
CPC010_A375_6H:BRD-K67637637-003-07-6:10	olopatadine	10 μM	6 h	-0.107616	0	0	A375
DOS047_A375_24H:BRD-K85322309-001-01-7:5.01	BRD-K85322309	5 μM	24 h	-0.10758	0	0	A375
DOS058_A375_24H:BRD-K67544217-019-01-1:5	BRD-K67544217	5 μM	24 h	-0.107559	0	0	A375
DOSBIO001_A375_24H:BRD-K79102010:9.95382	BRD-K79102010	10 μM	24 h	-0.107449	0	0	A375
CPC010_A375_6H:BRD-K75302809-001-03-2:10	BRD-K75302809	10 μM	6 h	-0.107444	0	0	A375
CPC007_A375_6H:BRD-K79522882-001-05-6:10	PSH-024	10 μM	6 h	-0.107433	0	0	A375
CPC016_A375_6H:BRD-K31611373-001-02-7:10	fluprostenol	10 μM	6 h	-0.107424	0	0	A375
CPC008_A375_6H:BRD-A17757596-001-01-1:10	BRD-A17757596	10 μM	6 h	-0.10738	0	0	A375
DOS057_A375_24H:BRD-K16769902-001-01-4:5	BRD-K16769902	5 μM	24 h	-0.107356	0	0	A375
CPC006_A375_6H:BRD-K98548675-001-02-6:10	parthenolide	10 μM	6 h	-0.107289	0	0	A375
CPC014_A375_6H:BRD-K99498722-001-01-8:10	plinabulin	10 μM	6 h	-0.107272	0	0	A375
CPC019_A375_6H:BRD-A81282034-001-02-9:10	BRD-A81282034	10 μM	6 h	-0.107203	0	0	A375
CPC018_A375_6H:BRD-K40990712-001-02-4:10	hexamethyleneamiloride	10 μM	6 h	-0.107201	0	0	A375
DOS047_A375_24H:BRD-K95545045-001-01-0:5.04	SA-1459172	5 μM	24 h	-0.10719	0	0	A375
PCLB003_A375_24H:BRD-K21001652-001-01-7:0.37	BRD-K21001652	0.37 μM	24 h	-0.107136	0	0	A375
CPC010_A375_6H:BRD-K70490179-311-02-7:10	rimcazole	10 μM	6 h	-0.106986	0	0	A375
DOS053_A375_24H:BRD-K02317159-001-01-8:5.05	BRD-K02317159	5 μM	24 h	-0.106927	0	0	A375
CPC006_A375_6H:BRD-K64634304-001-01-5:40	tretinoin	40 μM	6 h	-0.106914	0	0	A375
DOS046_A375_24H:BRD-K27366480-001-01-6:5	BRD-K27366480	5 μM	24 h	-0.10691	0	0	A375
CPC005_A375_6H:BRD-K31987754-001-01-2:10	oleylethanolamide	10 μM	6 h	-0.106892	0	0	A375
DOS057_A375_24H:BRD-K44732214-001-01-1:5	BRD-K44732214	5 μM	24 h	-0.106886	0	0	A375
DOS058_A375_24H:BRD-K50598383-019-01-4:5	BRD-K50598383	5 μM	24 h	-0.106833	0	0	A375
CPC018_A375_6H:BRD-K01292756-001-13-6:10	pimozide	10 μM	6 h	-0.106724	0	0	A375
DOS049_A375_24H:BRD-K31678340-001-01-8:5	BRD-K31678340	5 μM	24 h	-0.10671	0	0	A375
CPC019_A375_6H:BRD-K86899078-001-01-2:10	BRD-K86899078	10 μM	6 h	-0.106679	0	0	A375
DOS042_A375_24H:BRD-K88187036-001-01-1:5.02	BRD-K88187036	5 μM	24 h	-0.106583	0	0	A375
DOS044_A375_24H:BRD-K78719595-001-01-6:5.02	BRD-K78719595	5 μM	24 h	-0.106555	0	0	A375
DOS044_A375_24H:BRD-K24671931-001-02-5:5.02	BRD-K24671931	5 μM	24 h	-0.106503	0	0	A375
DOS033_A375_24H:BRD-K41763112-001-01-2:5.05	BRD-K41763112	5 μM	24 h	-0.106482	0	0	A375
DOS033_A375_24H:BRD-K70496443-001-01-3:5.02	BRD-K70496443	5 μM	24 h	-0.106472	0	0	A375
DOS055_A375_24H:BRD-K23578923-001-01-5:5	BRD-K23578923	5 μM	24 h	-0.106463	0	0	A375
DOS042_A375_24H:BRD-K33451389-001-01-0:5.09	BRD-K33451389	5 μM	24 h	-0.106453	0	0	A375
CPC020_A375_6H:BRD-K90027355-001-10-9:10	spironolactone	10 μM	6 h	-0.106452	0	0	A375
CPC008_A375_24H:BRD-K37456065-001-01-6:10	VU-0365114-2	10 μM	24 h	-0.10642	0	0	A375
DOS044_A375_24H:BRD-K28329571-001-01-3:5.05	BRD-K28329571	5 μM	24 h	-0.106407	0	0	A375
CPC010_A375_6H:BRD-K27169919-001-07-2:10	BRD-K27169919	10 μM	6 h	-0.106282	0	0	A375
CPC017_A375_6H:BRD-K99107520-001-09-2:10	felbamate	10 μM	6 h	-0.106271	0	0	A375
DOS042_A375_24H:BRD-K66836247-001-01-4:4.95	BRD-K66836247	5 μM	24 h	-0.106242	0	0	A375
DOS055_A375_24H:BRD-K61776649-001-01-1:5	BRD-K61776649	5 μM	24 h	-0.106179	0	0	A375
CPC011_A375_6H:BRD-K60770992-066-21-9:10	pergolide	10 μM	6 h	-0.106138	0	0	A375
DOS039_A375_24H:BRD-K55293774-001-01-2:5.04	BRD-K55293774	5 μM	24 h	-0.106076	0	0	A375
CPC014_A375_6H:BRD-K01436366-001-02-4:10	XMD-1150	10 μM	6 h	-0.106036	0	0	A375
CPC013_A375_6H:BRD-K89162000-001-02-3:10	tandutinib	10 μM	6 h	-0.106031	0	0	A375
DOS058_A375_24H:BRD-K75907833-001-01-2:5	BRD-K75907833	5 μM	24 h	-0.106008	0	0	A375
DOS055_A375_24H:BRD-K63628486-001-01-8:5	BRD-K63628486	5 μM	24 h	-0.105951	0	0	A375
DOS053_A375_24H:BRD-K48923155-001-02-1:5.02	BRD-K48923155	5 μM	24 h	-0.105942	0	0	A375
CPC015_A375_6H:BRD-K29458283-001-17-4:10	chlorambucil	10 μM	6 h	-0.105933	0	0	A375
CPC006_A375_6H:BRD-K10882151-001-06-8:40	BO2-inhibits-RAD51	40 μM	6 h	-0.10592	0	0	A375
DOS054_A375_24H:BRD-K41641213-001-01-8:5	BRD-K41641213	5 μM	24 h	-0.105898	0	0	A375
DOS033_A375_24H:BRD-K01822243-001-01-6:5.02	BRD-K01822243	5 μM	24 h	-0.105799	0	0	A375
DOS034_A375_24H:BRD-K30633722-001-01-2:5.05	BRD-K30633722	5 μM	24 h	-0.105776	0	0	A375
CPC014_A375_6H:BRD-A39646320-001-01-3:10	HC-toxin	10 μM	6 h	-0.105742	0	0	A375
DOS047_A375_24H:BRD-K15752270-001-01-5:5	BRD-K15752270	5 μM	24 h	-0.105729	0	0	A375
CPC020_A375_6H:BRD-A79981887-003-14-9:10	midodrine	10 μM	6 h	-0.105728	0	0	A375
DOS058_A375_24H:BRD-K02098967-019-01-8:5	BRD-K02098967	5 μM	24 h	-0.105661	0	0	A375
CPC014_A375_6H:BRD-A96799240-001-01-7:10	4-hydroxyretinoic-acid	10 μM	6 h	-0.105625	0	0	A375
CPC012_A375_6H:BRD-K21672423-001-01-3:10	BRD-K21672423	10 μM	6 h	-0.105557	0	0	A375
CPC011_A375_6H:BRD-K93645900-001-08-9:10	tadalafil	10 μM	6 h	-0.105537	0	0	A375
CPC017_A375_6H:BRD-A73581086-001-01-3:10	ergometrine	10 μM	6 h	-0.105461	0	0	A375
CPC008_A375_6H:BRD-K55703048-001-04-4:10	latrepirdine	10 μM	6 h	-0.10546	0	0	A375
DOS054_A375_24H:BRD-K07073046-001-01-9:5	BRD-K07073046	5 μM	24 h	-0.105399	0	0	A375
CPC017_A375_6H:BRD-A59215453-003-03-3:10	lobelanidine	10 μM	6 h	-0.105391	0	0	A375
DOSBIO001_A375_24H:BRD-K63279176:10.0156	BRD-K63279176	10 μM	24 h	-0.10537	0	0	A375
CPC014_A375_6H:BRD-K36627727-001-01-3:10	tamibarotene	10 μM	6 h	-0.105299	0	0	A375
CPC014_A375_6H:BRD-K16485616-001-03-0:10	mocetinostat	10 μM	6 h	-0.105283	0	0	A375
DOS040_A375_24H:BRD-K18683499-001-01-4:5.04	BRD-K18683499	5 μM	24 h	-0.105282	0	0	A375
CPC004_A375_6H:BRD-A29734509-011-06-0:10	disopyramide	10 μM	6 h	-0.105264	0	0	A375
CPC012_A375_6H:BRD-K94991378-001-02-2:10	BRD-K94991378	10 μM	6 h	-0.10526	0	0	A375
CPC008_A375_24H:BRD-K68783079-019-01-1:10	BRD-K68783079	10 μM	24 h	-0.105232	0	0	A375
CPC018_A375_6H:BRD-K00610438-003-01-7:10	altanserin	10 μM	6 h	-0.105126	0	0	A375
CPC007_A375_6H:BRD-K75644678-001-03-5:10	BRD-K75644678	10 μM	6 h	-0.105087	0	0	A375
CPC005_A375_6H:BRD-K11742128-003-15-0:10	triprolidine	10 μM	6 h	-0.105021	0	0	A375
DOS052_A375_24H:BRD-K78710535-001-01-8:5	BRD-K78710535	5 μM	24 h	-0.105018	0	0	A375
DOS033_A375_24H:BRD-K64968742-001-01-7:5	BRD-K64968742	5 μM	24 h	-0.105003	0	0	A375
DOS046_A375_24H:BRD-K26542939-001-01-0:5	BRD-K26542939	5 μM	24 h	-0.104999	0	0	A375
CPC017_A375_6H:BRD-K28761384-003-03-6:10	zuclopenthixol	10 μM	6 h	-0.104978	0	0	A375
DOS034_A375_24H:BRD-K12345237-001-01-3:5.01	BRD-K12345237	5 μM	24 h	-0.104957	0	0	A375
DOS034_A375_24H:BRD-K28083085-001-01-5:5.03	BRD-K28083085	5 μM	24 h	-0.10495	0	0	A375
CPC020_A375_6H:BRD-K70976396-236-22-9:10	cefoxitin	10 μM	6 h	-0.104943	0	0	A375
CPC020_A375_6H:BRD-K69688083-004-17-3:10	mestinon	10 μM	6 h	-0.104942	0	0	A375
CPC012_A375_6H:BRD-K76052538-001-01-4:10	BRD-K76052538	10 μM	6 h	-0.104901	0	0	A375
DOS043_A375_24H:BRD-K61051532-001-01-9:4.85	BRD-K61051532	5 μM	24 h	-0.10488	0	0	A375
CPC007_A375_24H:BRD-K05153001-001-05-5:10	BRD-K05153001	10 μM	24 h	-0.104872	0	0	A375
DOSBIO002_A375_24H:BRD-K22052171:9.97874	BRD-K22052171	10 μM	24 h	-0.104851	0	0	A375
CPC016_A375_6H:BRD-K06147391-300-04-3:10	telenzepine	10 μM	6 h	-0.104826	0	0	A375
CPC006_A375_6H:BRD-K82135108-001-01-9:10	elesclomol	10 μM	6 h	-0.104821	0	0	A375
DOS049_A375_24H:BRD-K00183357-001-01-6:5	BRD-K00183357	5 μM	24 h	-0.104821	0	0	A375
CPC011_A375_6H:BRD-K37991163-050-13-5:10	paroxetine	10 μM	6 h	-0.104799	0	0	A375
CPC011_A375_6H:BRD-K33226500-065-07-2:10	indinavir	10 μM	6 h	-0.104759	0	0	A375
DOS044_A375_24H:BRD-K84879982-001-01-1:5.03	BRD-K84879982	5 μM	24 h	-0.1047	0	0	A375
PCLB003_A375_24H:BRD-K16410418-001-02-0:0.37	BRD-K16410418	0.37 μM	24 h	-0.104609	0	0	A375
CPC011_A375_6H:BRD-K96471533-001-04-1:10	nitazoxanide	10 μM	6 h	-0.104603	0	0	A375
CPC010_A375_6H:BRD-K65774694-001-02-4:10	BRD-K65774694	10 μM	6 h	-0.104556	0	0	A375
CPC019_A375_6H:BRD-K22931010-001-02-9:10	KM-00519SC	10 μM	6 h	-0.104452	0	0	A375
DOS042_A375_24H:BRD-K61907493-001-01-9:4.96	BRD-K61907493	5 μM	24 h	-0.104354	0	0	A375
CPC019_A375_6H:BRD-K67519589-001-01-1:10	BRD-K67519589	10 μM	6 h	-0.104333	0	0	A375
DOS042_A375_24H:BRD-K15778794-001-01-7:4.95	BRD-K15778794	5 μM	24 h	-0.104295	0	0	A375
PCLB003_A375_24H:BRD-K22321414-001-01-7:0.12	BRD-K22321414	0.12 μM	24 h	-0.104268	0	0	A375
CPC004_A375_6H:BRD-K47717570-304-01-5:10	NBQX	10 μM	6 h	-0.104227	0	0	A375
DOS041_A375_24H:BRD-K82003968-001-01-8:5.05	BRD-K82003968	5 μM	24 h	-0.104216	0	0	A375
DOS057_A375_24H:BRD-K27925875-001-01-2:5	BRD-K27925875	5 μM	24 h	-0.10416	0	0	A375
CPC015_A375_6H:BRD-A50675702-001-04-8:10	fipronil	10 μM	6 h	-0.104085	0	0	A375
DOS033_A375_24H:BRD-K49751344-001-01-9:5.04	BRD-K49751344	5 μM	24 h	-0.104082	0	0	A375
DOS043_A375_24H:BRD-K31103241-001-01-7:5.23	BRD-K31103241	5 μM	24 h	-0.104079	0	0	A375
DOS040_A375_24H:BRD-K65437607-001-01-6:5.02	BRD-K65437607	5 μM	24 h	-0.104043	0	0	A375
CPC013_A375_6H:BRD-K28789065-001-01-1:10	BRD-K28789065	10 μM	6 h	-0.104031	0	0	A375
DOS043_A375_24H:BRD-K96742509-001-03-7:5	BRD-K96742509	5 μM	24 h	-0.104018	0	0	A375
CPC011_A375_6H:BRD-K41051431-001-01-6:10	mecillinam	10 μM	6 h	-0.103903	0	0	A375
DOS048_A375_24H:BRD-K85616320-001-01-7:5.02	BRD-K85616320	5 μM	24 h	-0.103897	0	0	A375
DOS039_A375_24H:BRD-K19294102-001-01-8:4.88	BRD-K19294102	5 μM	24 h	-0.103894	0	0	A375
CPC019_A375_6H:BRD-A03926027-001-02-5:10	ST-014147	10 μM	6 h	-0.103839	0	0	A375
DOS058_A375_24H:BRD-K69682028-019-01-6:5	BRD-K69682028	5 μM	24 h	-0.103827	0	0	A375
CPC018_A375_6H:BRD-K76617868-003-03-6:10	fasudil	10 μM	6 h	-0.10373	0	0	A375
CPC005_A375_6H:BRD-A92670106-003-03-9:10	tocainide	10 μM	6 h	-0.103687	0	0	A375
CPC006_A375_6H:BRD-K06792661-001-01-9:10	narciclasine	10 μM	6 h	-0.103662	0	0	A375
DOS034_A375_24H:BRD-K54263226-001-01-0:4.99	BRD-K54263226	5 μM	24 h	-0.103638	0	0	A375
CPC020_A375_6H:BRD-K66598898-001-01-2:10	BRD-K66598898	10 μM	6 h	-0.103626	0	0	A375
PCLB001_A375_6H:BRD-A34462049-001-04-4:2.5	tigecycline	3 μM	6 h	-0.103611	0	0	A375
CPC012_A375_6H:BRD-K76882924-001-01-6:10	BRD-K76882924	10 μM	6 h	-0.103607	0	0	A375
CPC006_A375_6H:BRD-K02113016-001-01-4:44.4	olaparib	40 μM	6 h	-0.103594	0	0	A375
DOS056_A375_24H:BRD-K02098145-001-01-1:5	BRD-K02098145	5 μM	24 h	-0.103591	0	0	A375
CPC020_A375_6H:BRD-K38144109-001-01-5:10	BRD-K38144109	10 μM	6 h	-0.103568	0	0	A375
DOS041_A375_24H:BRD-K35957449-001-01-2:4.94	BRD-K35957449	5 μM	24 h	-0.103566	0	0	A375
CPC004_A375_6H:BRD-A06352418-001-15-0:10	terfenadine	10 μM	6 h	-0.103494	0	0	A375
DOS053_A375_24H:BRD-K87445406-001-01-6:5.03	BRD-K87445406	5 μM	24 h	-0.103408	0	0	A375
CPC008_A375_24H:BRD-K63178889-001-01-7:10	BRD-K63178889	10 μM	24 h	-0.103401	0	0	A375
DOS043_A375_24H:BRD-K71401720-001-01-6:5.19	BRD-K71401720	5 μM	24 h	-0.103312	0	0	A375
CPC011_A375_6H:BRD-K18779551-003-05-2:10	bifemelane	10 μM	6 h	-0.103217	0	0	A375
DOS049_A375_24H:BRD-K32290015-001-01-5:5	BRD-K32290015	5 μM	24 h	-0.103192	0	0	A375
DOS055_A375_24H:BRD-K28698886-001-01-1:5	BRD-K28698886	5 μM	24 h	-0.103181	0	0	A375
DOS055_A375_24H:BRD-K61122325-001-01-9:5	BRD-K61122325	5 μM	24 h	-0.103128	0	0	A375
CPC017_A375_6H:BRD-K72541103-001-01-5:10	JAK3-inhibitor-I	10 μM	6 h	-0.103107	0	0	A375
CPC011_A375_6H:BRD-K19462402-003-19-6:10	buflomedil	10 μM	6 h	-0.10305	0	0	A375
DOS046_A375_24H:BRD-K50827439-001-01-9:5	BRD-K50827439	5 μM	24 h	-0.103049	0	0	A375
CPC005_A375_24H:BRD-K43405658-001-01-8:10	tyrphostin-AG-527	10 μM	24 h	-0.103019	0	0	A375
CPC009_A375_6H:BRD-K22878149-337-02-4:10	SB-205607	10 μM	6 h	-0.103006	0	0	A375
DOSBIO002_A375_24H:BRD-K62919978:10.1501	BRD-K62919978	10 μM	24 h	-0.102999	0	0	A375
CPC017_A375_6H:BRD-K12184470-300-01-8:10	flunarizine	10 μM	6 h	-0.102993	0	0	A375
CPC005_A375_24H:BRD-A34299591-001-03-4:10	budesonide	10 μM	24 h	-0.102977	0	0	A375
CPC019_A375_6H:BRD-K80094086-001-01-6:10	BRD-K80094086	10 μM	6 h	-0.102824	0	0	A375
CPC015_A375_6H:BRD-K50660797-001-03-6:10	epicatechin-gallate-(-)	10 μM	6 h	-0.102785	0	0	A375
CPC012_A375_6H:BRD-K58070753-001-01-6:10	BRD-K58070753	10 μM	6 h	-0.102785	0	0	A375
CPC007_A375_6H:BRD-K11187612-001-05-6:10	BRD-K11187612	10 μM	6 h	-0.102764	0	0	A375
DOS043_A375_24H:BRD-K00472408-001-03-8:5	BRD-K00472408	5 μM	24 h	-0.10275	0	0	A375
CPC016_A375_6H:BRD-K34330170-001-02-6:10	rotenonic-acid	10 μM	6 h	-0.102742	0	0	A375
DOS049_A375_24H:BRD-K92827116-001-01-9:5	BRD-K92827116	5 μM	24 h	-0.102659	0	0	A375
DOS041_A375_24H:BRD-K90873269-001-01-0:5.05	BRD-K90873269	5 μM	24 h	-0.10261	0	0	A375
DOSBIO001_A375_24H:BRD-K23319301:10.08	BRD-K23319301	10 μM	24 h	-0.102609	0	0	A375
CPC006_A375_24H:BRD-K52836380-001-01-7:22.2	AZD-7545	20 μM	24 h	-0.102555	0	0	A375
CPC017_A375_6H:BRD-A34706053-003-01-9:10	CGP-12177	10 μM	6 h	-0.102524	0	0	A375
DOS054_A375_24H:BRD-K08058167-001-01-2:5	BRD-K08058167	5 μM	24 h	-0.102394	0	0	A375
DOSBIO002_A375_24H:BRD-K20332840:9.94705	BRD-K20332840	10 μM	24 h	-0.102377	0	0	A375
CPC020_A375_6H:BRD-K51267267-001-01-4:10	BRD-K51267267	10 μM	6 h	-0.102372	0	0	A375
CPC013_A375_6H:BRD-K29905972-001-03-0:10	axitinib	10 μM	6 h	-0.102326	0	0	A375
CPC008_A375_6H:BRD-K71382703-001-01-9:10	BRD-K71382703	10 μM	6 h	-0.102308	0	0	A375
DOS042_A375_24H:BRD-K45723650-001-01-0:5.02	BRD-K45723650	5 μM	24 h	-0.10223	0	0	A375
CPC006_A375_6H:BRD-K82818427-001-01-4:44.4	batimastat	40 μM	6 h	-0.102183	0	0	A375
DOS044_A375_24H:BRD-K43915000-001-01-1:5	BRD-K43915000	5 μM	24 h	-0.102142	0	0	A375
DOS055_A375_24H:BRD-K60796852-001-01-2:5	BRD-K60796852	5 μM	24 h	-0.102102	0	0	A375
CPC015_A375_6H:BRD-K95435023-001-01-0:10	PHA-665752	10 μM	6 h	-0.1021	0	0	A375
CPC008_A375_24H:BRD-K34388789-001-04-3:10	BRD-K34388789	10 μM	24 h	-0.102096	0	0	A375
DOS040_A375_24H:BRD-K95360473-001-01-5:4.97	BRD-K95360473	5 μM	24 h	-0.102048	0	0	A375
CPC019_A375_6H:BRD-K84450674-001-01-4:10	BRD-K84450674	10 μM	6 h	-0.102027	0	0	A375
CPC008_A375_24H:BRD-K76907295-001-03-8:10	VU-0418947-2	10 μM	24 h	-0.102026	0	0	A375
DOS033_A375_24H:BRD-K52827598-001-01-4:5.01	BRD-K52827598	5 μM	24 h	-0.101954	0	0	A375
DOS058_A375_24H:BRD-K94169505-019-01-5:5	BRD-K94169505	5 μM	24 h	-0.101907	0	0	A375
DOS044_A375_24H:BRD-K19302998-001-01-6:5.01	BRD-K19302998	5 μM	24 h	-0.101888	0	0	A375
CPC006_A375_6H:BRD-K15108141-001-01-7:0.08	gemcitabine	100 nM	6 h	-0.10188	0	0	A375
CPC004_A375_6H:BRD-K02265150-001-15-8:10	amoxapine	10 μM	6 h	-0.101848	0	0	A375
CPC008_A375_6H:BRD-K20923001-001-04-5:10	BRD-K20923001	10 μM	6 h	-0.101836	0	0	A375
CPC012_A375_6H:BRD-K26863634-001-02-6:10	BIX-01338	10 μM	6 h	-0.10182	0	0	A375
CPC010_A375_6H:BRD-A96006241-001-03-2:10	BRD-A96006241	10 μM	6 h	-0.101795	0	0	A375
DOS047_A375_24H:BRD-K15392449-001-01-6:5.05	SA-1457187	5 μM	24 h	-0.101765	0	0	A375
CPC013_A375_6H:BRD-A07614565-001-01-3:10	BRD-A07614565	10 μM	6 h	-0.10171	0	0	A375
CPC008_A375_6H:BRD-A34421300-001-01-0:10	BRD-A34421300	10 μM	6 h	-0.101694	0	0	A375
CPC007_A375_6H:BRD-K90826279-001-07-3:10	BRD-K90826279	10 μM	6 h	-0.101689	0	0	A375
DOS046_A375_24H:BRD-K46297593-001-01-4:5	BRD-K46297593	5 μM	24 h	-0.101687	0	0	A375
CPC006_A375_24H:BRD-K67566344-001-01-8:10	KU-0063794	10 μM	24 h	-0.101669	0	0	A375
DOS054_A375_24H:BRD-K97824883-001-01-2:5	BRD-K97824883	5 μM	24 h	-0.101659	0	0	A375
DOS057_A375_24H:BRD-K16157799-001-01-8:5	BRD-K16157799	5 μM	24 h	-0.101651	0	0	A375
DOS052_A375_24H:BRD-K78853683-001-01-6:5	BRD-K78853683	5 μM	24 h	-0.101632	0	0	A375
CPC017_A375_6H:BRD-A01295252-001-01-5:10	7-hydroxy-PIPAT	10 μM	6 h	-0.101517	0	0	A375
DOS047_A375_24H:BRD-K63072081-001-01-8:4.97	BRD-K63072081	5 μM	24 h	-0.101492	0	0	A375
DOS048_A375_24H:BRD-K72150200-001-01-7:5.03	BRD-K72150200	5 μM	24 h	-0.10145	0	0	A375
DOS047_A375_24H:BRD-K26676775-001-01-3:5.03	SA-1460192	5 μM	24 h	-0.101446	0	0	A375
CPC013_A375_6H:BRD-K19166598-001-01-9:10	BRD-K19166598	10 μM	6 h	-0.101434	0	0	A375
DOS058_A375_24H:BRD-K84687999-001-01-9:5	BRD-K84687999	5 μM	24 h	-0.101402	0	0	A375
CPC008_A375_6H:BRD-A42031983-019-01-3:10	VU-0415555-1	10 μM	6 h	-0.101345	0	0	A375
DOS033_A375_24H:BRD-K17288883-001-01-7:5.02	BRD-K17288883	5 μM	24 h	-0.101334	0	0	A375
DOS042_A375_24H:BRD-K80789291-001-01-2:5.03	BRD-K80789291	5 μM	24 h	-0.101324	0	0	A375
CPC006_A375_24H:BRD-K01976263-003-04-5:0.63	emetine	500 nM	24 h	-0.101294	0	0	A375
CPC006_A375_24H:BRD-K12994359-001-07-7:177.6	valdecoxib	100 μM	24 h	-0.101271	0	0	A375
CPC019_A375_6H:BRD-K83816656-001-01-9:10	BRD-K83816656	10 μM	6 h	-0.101268	0	0	A375
DOS053_A375_24H:BRD-K85205404-001-01-8:5	BRD-K85205404	5 μM	24 h	-0.10124	0	0	A375
CPC018_A375_6H:BRD-K67847053-015-08-8:10	guanabenz	10 μM	6 h	-0.101226	0	0	A375
DOS033_A375_24H:BRD-K30371494-001-01-5:5	BRD-K30371494	5 μM	24 h	-0.10122	0	0	A375
DOS044_A375_24H:BRD-K12880737-001-02-2:5.01	BRD-K12880737	5 μM	24 h	-0.101174	0	0	A375
CPC018_A375_6H:BRD-K06980535-003-15-0:10	promazine	10 μM	6 h	-0.101123	0	0	A375
DOS054_A375_24H:BRD-K36619075-001-01-8:5	BRD-K36619075	5 μM	24 h	-0.101102	0	0	A375
DOS040_A375_24H:BRD-K84907327-001-01-4:5	BRD-K84907327	5 μM	24 h	-0.101096	0	0	A375
CPC004_A375_6H:BRD-K96319534-001-01-7:10	phentermine	10 μM	6 h	-0.101095	0	0	A375
DOSBIO002_A375_24H:BRD-K60637442:10.0717	BRD-K60637442	10 μM	24 h	-0.101095	0	0	A375
DOSBIO002_A375_24H:BRD-K12124649:10.0725	BRD-K12124649	10 μM	24 h	-0.101012	0	0	A375
DOS052_A375_24H:BRD-K64544620-001-01-3:5.07	BRD-K64544620	5 μM	24 h	-0.100925	0	0	A375
CPC005_A375_6H:BRD-K50495309-001-01-2:10	SRC-kinase-inhibitor-I	10 μM	6 h	-0.100895	0	0	A375
CPC015_A375_6H:BRD-A72596465-001-01-3:10	GW-6471	10 μM	6 h	-0.100828	0	0	A375
CPC018_A375_6H:BRD-K13169950-001-04-5:10	NSC-3852	10 μM	6 h	-0.100822	0	0	A375
DOS044_A375_24H:BRD-K55569103-001-02-5:5	BRD-K55569103	5 μM	24 h	-0.100785	0	0	A375
CPC017_A375_6H:BRD-K71430621-303-01-5:10	clobenpropit	10 μM	6 h	-0.100749	0	0	A375
DOS039_A375_24H:BRD-K38717348-001-01-9:5.05	BRD-K38717348	5 μM	24 h	-0.100722	0	0	A375
DOS052_A375_24H:BRD-K17666351-001-02-5:5.01	BRD-K17666351	5 μM	24 h	-0.100659	0	0	A375
CPC007_A375_24H:BRD-K92419424-001-05-3:10	BRD-K92419424	10 μM	24 h	-0.100579	0	0	A375
DOS055_A375_24H:BRD-K24632043-001-01-4:5	BRD-K24632043	5 μM	24 h	-0.100415	0	0	A375
CPC016_A375_6H:BRD-A31227688-001-02-4:10	kynuramine	10 μM	6 h	-0.100398	0	0	A375
CPC020_A375_6H:BRD-A75144621-001-02-8:10	digoxin	10 μM	6 h	-0.10039	0	0	A375
CPC004_A375_6H:BRD-K51662849-001-03-9:10	ilomastat	10 μM	6 h	-0.100355	0	0	A375
DOS049_A375_24H:BRD-K39709536-001-01-7:5	BRD-K39709536	5 μM	24 h	-0.100354	0	0	A375
CPC019_A375_6H:BRD-K57786095-001-01-5:10	BRD-K57786095	10 μM	6 h	-0.10034	0	0	A375
DOS055_A375_24H:BRD-K93062774-001-01-5:5	BRD-K93062774	5 μM	24 h	-0.10032	0	0	A375
CPC008_A375_24H:BRD-K43992206-001-01-2:10	VU-0413243-1	10 μM	24 h	-0.100263	0	0	A375
DOS056_A375_24H:BRD-K16481946-001-01-4:5	BRD-K16481946	5 μM	24 h	-0.100228	0	0	A375
DOS049_A375_24H:BRD-K05496005-001-01-3:5	BRD-K05496005	5 μM	24 h	-0.10022	0	0	A375
DOS043_A375_24H:BRD-K62917576-001-01-7:4.92	BRD-K62917576	5 μM	24 h	-0.100211	0	0	A375
CPC005_A375_6H:BRD-A92585442-237-01-0:10	RU-28318	10 μM	6 h	-0.100186	0	0	A375
DOS034_A375_24H:BRD-K77922066-001-01-7:5.01	BRD-K77922066	5 μM	24 h	-0.100116	0	0	A375
DOSBIO001_A375_24H:BRD-K63923428:10.5408	BRD-K63923428	10 μM	24 h	-0.100063	0	0	A375
BRAF001_A375_6H:BRD-K92778217-001-21-0:2.5	mefenamic-acid	3 μM	6 h	-0.100006	0	0	A375
DOSBIO001_A375_24H:BRD-K70900504:10.0464	BRD-K70900504	10 μM	24 h	-0.0999002	0	0	A375
DOS043_A375_24H:BRD-K36656125-001-01-0:4.97	BRD-K36656125	5 μM	24 h	-0.099865	0	0	A375
CPC017_A375_6H:BRD-A20968261-001-01-3:10	WAY-213613	10 μM	6 h	-0.0998534	0	0	A375
CPC006_A375_6H:BRD-K63195589-001-01-4:10	tipifarnib	10 μM	6 h	-0.0998475	0	0	A375
CPC015_A375_6H:BRD-K47635719-001-03-9:10	dexamethasone	10 μM	6 h	-0.0997779	0	0	A375
DOS058_A375_24H:BRD-K94003664-019-01-3:5	BRD-K94003664	5 μM	24 h	-0.0997689	0	0	A375
DOS052_A375_24H:BRD-K81873565-001-01-2:4.91	BRD-K81873565	5 μM	24 h	-0.0997643	0	0	A375
CPC004_A375_6H:BRD-A46747628-001-01-9:10	ouabain	10 μM	6 h	-0.0996815	0	0	A375
DOS058_A375_24H:BRD-K42916718-019-01-5:5	BRD-K42916718	5 μM	24 h	-0.0996507	0	0	A375
CPC008_A375_24H:BRD-A03436432-001-04-0:10	BRD-A03436432	10 μM	24 h	-0.0995868	0	0	A375
DOS040_A375_24H:BRD-K00801770-001-01-2:4.99	BRD-K00801770	5 μM	24 h	-0.0995214	0	0	A375
CPC005_A375_6H:BRD-A02189320-015-02-5:10	met-leu-phe	10 μM	6 h	-0.0994074	0	0	A375
CPC009_A375_6H:BRD-K71140693-001-04-7:10	BRD-K71140693	10 μM	6 h	-0.0994018	0	0	A375
DOS047_A375_24H:BRD-K91729331-001-01-7:5.06	BRD-K91729331	5 μM	24 h	-0.0993889	0	0	A375
CPC016_A375_6H:BRD-K79425933-001-03-6:10	benperidol	10 μM	6 h	-0.0993719	0	0	A375
DOS047_A375_24H:BRD-K10327449-001-01-7:5.07	SA-1457945	5 μM	24 h	-0.0992708	0	0	A375
DOS057_A375_24H:BRD-K16097209-001-01-0:5	BRD-K16097209	5 μM	24 h	-0.099233	0	0	A375
CPC008_A375_24H:BRD-K89748981-001-01-4:10	BRD-K89748981	10 μM	24 h	-0.0992278	0	0	A375
CPC013_A375_6H:BRD-K86631041-001-01-3:10	BRD-K86631041	10 μM	6 h	-0.0991854	0	0	A375
CPC008_A375_6H:BRD-K19059335-001-06-3:10	BRD-K19059335	10 μM	6 h	-0.0991836	0	0	A375
DOS057_A375_24H:BRD-K51930253-001-01-3:5	BRD-K51930253	5 μM	24 h	-0.0991514	0	0	A375
DOS043_A375_24H:BRD-K54051742-001-03-0:4.99	BRD-K54051742	5 μM	24 h	-0.0991309	0	0	A375
CPC005_A375_24H:BRD-K68402494-003-01-9:10	ML-9	10 μM	24 h	-0.0991251	0	0	A375
DOS052_A375_24H:BRD-K14487375-001-01-3:5.06	BRD-K14487375	5 μM	24 h	-0.0990449	0	0	A375
CPC019_A375_6H:BRD-K74486276-001-01-2:10	BRD-K74486276	10 μM	6 h	-0.0990423	0	0	A375
CPC018_A375_6H:BRD-K06817181-001-01-5:10	1,2,3,4,5,6-hexabromocyclohexane	10 μM	6 h	-0.0990363	0	0	A375
CPC009_A375_6H:BRD-K40955748-001-01-7:10	BRD-K40955748	10 μM	6 h	-0.0990332	0	0	A375
DOS052_A375_24H:BRD-K70077013-001-01-1:5.02	BRD-K70077013	5 μM	24 h	-0.0989994	0	0	A375
CPC013_A375_6H:BRD-K16925374-001-01-1:10	BRD-K16925374	10 μM	6 h	-0.0989816	0	0	A375
CPC008_A375_6H:BRD-K54470384-019-01-1:10	BRD-K54470384	10 μM	6 h	-0.0989305	0	0	A375
CPC015_A375_6H:BRD-A39969961-001-01-3:10	eplerenone	10 μM	6 h	-0.098929	0	0	A375
DOS057_A375_24H:BRD-K32014638-001-01-6:5	BRD-K32014638	5 μM	24 h	-0.0989228	0	0	A375
CPC020_A375_6H:BRD-K34332553-001-05-2:10	BRD-K34332553	10 μM	6 h	-0.0989181	0	0	A375
CPC005_A375_24H:BRD-A78360835-001-01-1:10	cercosporin	10 μM	24 h	-0.0989169	0	0	A375
DOSBIO002_A375_24H:BRD-K23050218:10.1328	BRD-K23050218	10 μM	24 h	-0.0988872	0	0	A375
DOS046_A375_24H:BRD-K43540029-001-01-4:5	BRD-K43540029	5 μM	24 h	-0.0988563	0	0	A375
DOSBIO001_A375_24H:BRD-K69894866:9.93102	BRD-K69894866	10 μM	24 h	-0.0988537	0	0	A375
DOS047_A375_24H:BRD-K35558120-001-01-4:5	BRD-K35558120	5 μM	24 h	-0.0987986	0	0	A375
DOSBIO001_A375_24H:BRD-K84528570:10.0272	BRD-K84528570	10 μM	24 h	-0.0987941	0	0	A375
DOS043_A375_24H:BRD-K69705756-001-01-1:4.61	BRD-K69705756	5 μM	24 h	-0.0987836	0	0	A375
CPC010_A375_6H:BRD-A24891640-001-15-5:10	nimodipine	10 μM	6 h	-0.0985906	0	0	A375
CPC012_A375_6H:BRD-K98896788-001-02-3:10	BRD-K98896788	10 μM	6 h	-0.0985877	0	0	A375
CPC017_A375_6H:BRD-K53570330-001-02-0:10	carbofuran	10 μM	6 h	-0.098587	0	0	A375
DOS042_A375_24H:BRD-K26484639-001-01-8:5.19	BRD-K26484639	5 μM	24 h	-0.098574	0	0	A375
DOS054_A375_24H:BRD-K07360484-001-01-9:5	BRD-K07360484	5 μM	24 h	-0.0985471	0	0	A375
CPC012_A375_6H:BRD-K10573841-001-01-0:10	tunicamycin	10 μM	6 h	-0.0985032	0	0	A375
DOS055_A375_24H:BRD-K54945117-001-01-4:5	BRD-K54945117	5 μM	24 h	-0.0984905	0	0	A375
DOS034_A375_24H:BRD-K21658057-001-01-5:5.15	BRD-K21658057	5 μM	24 h	-0.0984702	0	0	A375
DOS058_A375_24H:BRD-K41953699-019-01-2:5	BRD-K41953699	5 μM	24 h	-0.0984653	0	0	A375
CPC005_A375_24H:BRD-K46678324-001-02-9:10	RHO-kinase-inhibitor-II	10 μM	24 h	-0.0984524	0	0	A375
CPC010_A375_6H:BRD-K89832926-001-05-5:10	BRD-K89832926	10 μM	6 h	-0.0984458	0	0	A375
DOS057_A375_24H:BRD-K87829407-001-01-0:5	BRD-K87829407	5 μM	24 h	-0.0984438	0	0	A375
DOS041_A375_24H:BRD-K73639776-001-01-2:4.79	BRD-K73639776	5 μM	24 h	-0.0984366	0	0	A375
CPC008_A375_6H:BRD-K18453942-001-01-5:10	VU-0414833-2	10 μM	6 h	-0.0984191	0	0	A375
DOS041_A375_24H:BRD-K69722708-001-01-5:5.24	BRD-K69722708	5 μM	24 h	-0.0983889	0	0	A375
DOS040_A375_24H:BRD-K79410674-001-01-5:5.01	BRD-K79410674	5 μM	24 h	-0.0983742	0	0	A375
DOS049_A375_24H:BRD-K48853765-001-01-4:5	BRD-K48853765	5 μM	24 h	-0.0983629	0	0	A375
CPC020_A375_6H:BRD-A83892713-001-01-3:10	rifampicin	10 μM	6 h	-0.0983522	0	0	A375
CPC017_A375_6H:BRD-K62353524-001-01-8:10	DY-131	10 μM	6 h	-0.0983311	0	0	A375
CPC017_A375_6H:BRD-K02283807-003-01-4:10	GR-32191	10 μM	6 h	-0.0983157	0	0	A375
CPC009_A375_6H:BRD-K35191571-001-01-8:10	BRD-K35191571	10 μM	6 h	-0.0983056	0	0	A375
DOS054_A375_24H:BRD-K04288183-001-01-9:5	BRD-K04288183	5 μM	24 h	-0.0982907	0	0	A375
CPC017_A375_6H:BRD-K81029756-001-02-8:10	diltiazem	10 μM	6 h	-0.0982389	0	0	A375
CPC020_A375_6H:BRD-K80718156-001-01-5:10	BRD-K80718156	10 μM	6 h	-0.098231	0	0	A375
DOSBIO002_A375_24H:BRD-K40274786:9.99309	BRD-K40274786	10 μM	24 h	-0.0982279	0	0	A375
CPC020_A375_6H:BRD-K14888893-001-11-4:10	minoxidil	10 μM	6 h	-0.0982199	0	0	A375
DOS046_A375_24H:BRD-K60172814-001-01-3:5	BRD-K60172814	5 μM	24 h	-0.0981383	0	0	A375
CPC016_A375_6H:BRD-K93658967-001-01-7:10	aloisine	10 μM	6 h	-0.0979869	0	0	A375
DOS054_A375_24H:BRD-K88099061-001-01-6:5	BRD-K88099061	5 μM	24 h	-0.0979869	0	0	A375
CPC012_A375_6H:BRD-K18964980-001-01-4:10	TUL-XX025TFA	10 μM	6 h	-0.0979589	0	0	A375
DOS049_A375_24H:BRD-K91279674-001-01-8:5	BRD-K91279674	5 μM	24 h	-0.0978676	0	0	A375
DOS033_A375_24H:BRD-K08198655-001-01-5:4.82	BRD-K08198655	5 μM	24 h	-0.097867	0	0	A375
CPC004_A375_6H:BRD-A97479839-003-08-3:10	piperidolate	10 μM	6 h	-0.0978633	0	0	A375
DOS042_A375_24H:BRD-K93667957-001-01-0:5.03	BRD-K93667957	5 μM	24 h	-0.0978607	0	0	A375
CPC011_A375_6H:BRD-K54006094-357-07-5:10	formoterol	10 μM	6 h	-0.0978291	0	0	A375
CPC004_A375_6H:BRD-K95309561-001-15-5:10	dienestrol	10 μM	6 h	-0.0978093	0	0	A375
CPC008_A375_6H:BRD-K11928012-001-05-9:10	BRD-K11928012	10 μM	6 h	-0.0978068	0	0	A375
CPC019_A375_6H:BRD-K31706415-001-01-7:10	BRD-K31706415	10 μM	6 h	-0.0977492	0	0	A375
CPC009_A375_6H:BRD-K03857568-001-14-0:10	BRD-K03857568	10 μM	6 h	-0.0977179	0	0	A375
DOS034_A375_24H:BRD-K05150608-001-01-7:5.01	BRD-K05150608	5 μM	24 h	-0.0976171	0	0	A375
CPC009_A375_6H:BRD-K74989018-019-01-0:10	BRD-K74989018	10 μM	6 h	-0.0975835	0	0	A375
DOS055_A375_24H:BRD-K37399041-001-01-7:5	BRD-K37399041	5 μM	24 h	-0.0975568	0	0	A375
CPC009_A375_6H:BRD-K56593336-001-05-6:10	BRD-K56593336	10 μM	6 h	-0.0974917	0	0	A375
DOS047_A375_24H:BRD-K07269289-001-01-9:4.97	BRD-K07269289	5 μM	24 h	-0.0974799	0	0	A375
CPC013_A375_6H:BRD-A25416824-001-01-8:10	BRD-A25416824	10 μM	6 h	-0.0974278	0	0	A375
CPC012_A375_6H:BRD-K58972465-001-01-2:10	BRD-K58972465	10 μM	6 h	-0.0973182	0	0	A375
CPC009_A375_6H:BRD-K37124285-001-04-8:10	BRD-K37124285	10 μM	6 h	-0.0972802	0	0	A375
CPC010_A375_6H:BRD-K29160485-001-02-4:10	BRD-K29160485	10 μM	6 h	-0.0972168	0	0	A375
DOS046_A375_24H:BRD-K40408048-001-01-4:5	BRD-K40408048	5 μM	24 h	-0.0972011	0	0	A375
DOSBIO002_A375_24H:BRD-K43253317:9.93787	BRD-K43253317	10 μM	24 h	-0.097196	0	0	A375
DOS042_A375_24H:BRD-K61533941-001-01-1:5.01	BRD-K61533941	5 μM	24 h	-0.0971911	0	0	A375
DOSBIO002_A375_24H:BRD-K77402297:10.0098	BRD-K77402297	10 μM	24 h	-0.0971823	0	0	A375
DOSBIO001_A375_24H:BRD-K07907451:9.93583	BRD-K07907451	10 μM	24 h	-0.0971237	0	0	A375
DOS055_A375_24H:BRD-K69694842-001-01-3:5	BRD-K69694842	5 μM	24 h	-0.097098	0	0	A375
CPC020_A375_6H:BRD-K49519144-001-01-2:10	LY-2140023	10 μM	6 h	-0.0970476	0	0	A375
DOS047_A375_24H:BRD-K36130407-001-01-5:5.07	BRD-K36130407	5 μM	24 h	-0.097025	0	0	A375
CPC004_A375_6H:BRD-A18917088-001-03-1:10	estradiol	10 μM	6 h	-0.0969836	0	0	A375
DOS042_A375_24H:BRD-K94694331-001-01-0:4.85	BRD-K94694331	5 μM	24 h	-0.0969645	0	0	A375
DOS056_A375_24H:BRD-K90928795-001-01-5:5	BRD-K90928795	5 μM	24 h	-0.0969626	0	0	A375
DOS057_A375_24H:BRD-K21626096-001-01-5:5	BRD-K21626096	5 μM	24 h	-0.0969409	0	0	A375
DOS040_A375_24H:BRD-K50883617-001-01-6:5.04	BRD-K50883617	5 μM	24 h	-0.0969095	0	0	A375
DOS033_A375_24H:BRD-K93994036-001-01-3:5.03	BRD-K93994036	5 μM	24 h	-0.0969042	0	0	A375
DOS046_A375_24H:BRD-K22265882-001-01-9:5	BRD-K22265882	5 μM	24 h	-0.0968722	0	0	A375
DOS046_A375_24H:BRD-K11071576-001-01-5:5	BRD-K11071576	5 μM	24 h	-0.0968584	0	0	A375
CPC009_A375_6H:BRD-K40151202-001-04-6:10	BRD-K40151202	10 μM	6 h	-0.096814	0	0	A375
DOS054_A375_24H:BRD-K87313043-001-01-5:5	BRD-K87313043	5 μM	24 h	-0.0967717	0	0	A375
DOS039_A375_24H:BRD-K53285126-001-01-5:4.94	BRD-K53285126	5 μM	24 h	-0.0967696	0	0	A375
DOS048_A375_24H:BRD-K90680884-001-01-4:5	BRD-K90680884	5 μM	24 h	-0.0967143	0	0	A375
CPC018_A375_6H:BRD-K87919739-001-03-4:10	tyrphostin-AG-825	10 μM	6 h	-0.0966921	0	0	A375
CPC008_A375_24H:BRD-K98079119-001-01-8:10	BRD-K98079119	10 μM	24 h	-0.0966881	0	0	A375
CPC019_A375_6H:BRD-K76042595-001-01-5:10	SA-424577	10 μM	6 h	-0.0966218	0	0	A375
CPC004_A375_6H:BRD-A73368467-003-07-7:10	fexofenadine	10 μM	6 h	-0.0965893	0	0	A375
DOS046_A375_24H:BRD-K69197522-001-01-4:5	BRD-K69197522	5 μM	24 h	-0.0965868	0	0	A375
DOS057_A375_24H:BRD-K62536321-001-01-3:5	BRD-K62536321	5 μM	24 h	-0.0965689	0	0	A375
DOS033_A375_24H:BRD-K44647644-001-01-1:4.98	BRD-K44647644	5 μM	24 h	-0.0965675	0	0	A375
CPC008_A375_24H:BRD-K49712247-001-04-3:10	BRD-K49712247	10 μM	24 h	-0.0965592	0	0	A375
CPC019_A375_6H:BRD-K67090983-001-01-5:10	BRD-K67090983	10 μM	6 h	-0.0965581	0	0	A375
CPC019_A375_6H:BRD-K64366758-001-01-5:10	BRD-K64366758	10 μM	6 h	-0.0965425	0	0	A375
DOS048_A375_24H:BRD-K54652275-001-01-4:5.04	BRD-K54652275	5 μM	24 h	-0.0965359	0	0	A375
CPC013_A375_6H:BRD-K26048285-001-01-8:10	BRD-K26048285	10 μM	6 h	-0.0965244	0	0	A375
CPC004_A375_6H:BRD-A91008255-003-16-4:10	bepridil	10 μM	6 h	-0.0965207	0	0	A375
CPC011_A375_6H:BRD-K15916496-001-23-8:10	clotrimazole	10 μM	6 h	-0.0964922	0	0	A375
DOS042_A375_24H:BRD-K64537516-001-01-4:5.27	BRD-K64537516	5 μM	24 h	-0.0964574	0	0	A375
CPC007_A375_24H:BRD-A56831909-001-04-2:10	BRD-A56831909	10 μM	24 h	-0.0964499	0	0	A375
DOS041_A375_24H:BRD-K17655522-001-01-4:4.98	BRD-K17655522	5 μM	24 h	-0.0964424	0	0	A375
CPC010_A375_6H:BRD-K50938786-003-07-6:10	ropivacaine	10 μM	6 h	-0.0964351	0	0	A375
DOS046_A375_24H:BRD-K05132143-001-01-7:5	BRD-K05132143	5 μM	24 h	-0.0964013	0	0	A375
CPC015_A375_6H:BRD-A70649075-008-17-5:10	sulconazole	10 μM	6 h	-0.0963873	0	0	A375
CPC006_A375_6H:BRD-K02822062-001-01-3:10	CT-200783	10 μM	6 h	-0.0963514	0	0	A375
CPC015_A375_6H:BRD-A18202423-001-01-6:10	CPCCOEt	10 μM	6 h	-0.0963356	0	0	A375
CPC013_A375_6H:BRD-K64881305-001-01-1:10	ispinesib	10 μM	6 h	-0.0963203	0	0	A375
DOS042_A375_24H:BRD-K88092133-001-01-5:5	BRD-K88092133	5 μM	24 h	-0.0962193	0	0	A375
CPC009_A375_6H:BRD-A05565054-001-01-7:10	BRD-A05565054	10 μM	6 h	-0.0961694	0	0	A375
DOS057_A375_24H:BRD-K01886140-001-01-5:5	BRD-K01886140	5 μM	24 h	-0.0961212	0	0	A375
CPC013_A375_6H:BRD-K62982419-001-01-2:10	cilomilast	10 μM	6 h	-0.0960599	0	0	A375
DOS048_A375_24H:BRD-K65418120-001-01-4:5	BRD-K65418120	5 μM	24 h	-0.0960488	0	0	A375
DOS043_A375_24H:BRD-K54805796-001-01-8:5.28	BRD-K54805796	5 μM	24 h	-0.0960301	0	0	A375
DOS058_A375_24H:BRD-K72765192-019-01-4:5	BRD-K72765192	5 μM	24 h	-0.0959089	0	0	A375
DOS058_A375_24H:BRD-K49849398-019-01-8:5	BRD-K49849398	5 μM	24 h	-0.0958431	0	0	A375
CPC011_A375_6H:BRD-A47342814-311-04-9:10	naltrindole	10 μM	6 h	-0.0958392	0	0	A375
DOS054_A375_24H:BRD-K29311288-001-01-4:5	BRD-K29311288	5 μM	24 h	-0.0958321	0	0	A375
DOS049_A375_24H:BRD-K16914190-001-01-7:5	BRD-K16914190	5 μM	24 h	-0.0958044	0	0	A375
DOS039_A375_24H:BRD-K77791851-001-01-5:5.03	BRD-K77791851	5 μM	24 h	-0.0957413	0	0	A375
CPC008_A375_24H:BRD-K81592585-001-05-5:10	DM-55-3	10 μM	24 h	-0.0957368	0	0	A375
CPC008_A375_6H:BRD-K26906367-001-04-2:10	BRD-K26906367	10 μM	6 h	-0.0957286	0	0	A375
CPC012_A375_6H:BRD-K42091312-001-01-5:10	BRD-K42091312	10 μM	6 h	-0.0956799	0	0	A375
DOS053_A375_24H:BRD-K09701578-001-01-9:4.97	BRD-K09701578	5 μM	24 h	-0.095677	0	0	A375
DOS053_A375_24H:BRD-K00248931-001-01-2:4.95	BRD-K00248931	5 μM	24 h	-0.0956423	0	0	A375
DOS044_A375_24H:BRD-K41645779-001-01-5:5.02	BRD-K41645779	5 μM	24 h	-0.0956248	0	0	A375
DOS044_A375_24H:BRD-K43781861-001-03-1:5	BRD-K43781861	5 μM	24 h	-0.0955995	0	0	A375
CPC004_A375_6H:BRD-A33447119-001-03-3:10	oxfendazole	10 μM	6 h	-0.0955191	0	0	A375
CPC014_A375_6H:BRD-K50387473-001-01-1:10	XMD-892	10 μM	6 h	-0.0955178	0	0	A375
DOS046_A375_24H:BRD-K03006541-001-01-3:5	BRD-K03006541	5 μM	24 h	-0.095476	0	0	A375
[truncated: 21,053 more rows]
